# Supplementary material for: Kinetic hydricity of silane hydrides in the gas phase
Source: Royal Society of Chemistry journal article supplement (doi:10.1039/c9sc02118c), 2019-01-01

## **Kinetic Hydricity of Silane Hydrides in the Gas Phase**

Jiahui Xu, Allison E. Krajewski, Yijie Niu,  
G.S.M Kiruba and Jeehiun K. Lee\*

### **Supporting Information**

## Table of Contents

|                                                                                                                                   |    |
|-----------------------------------------------------------------------------------------------------------------------------------|----|
| Calculated Structures .....                                                                                                       | 5  |
| Calculated Structures of Electrophiles: Enthalpy (Free Energy) in Hartree, B3LYP/6-31+G(d), 298K .....                            | 5  |
| Calculated Structures of Silane Hydrides: Enthalpy (Free Energy) in Hartree, B3LYP/6-31+G(d), 298K .....                          | 9  |
| Calculated Structures of Silane Hydrides: Enthalpy (Free Energy) in Hartree, B3LYP/6-31+G(d), SMD (methylene chloride) 298K ..... | 9  |
| Calculated Structures of Table 4 Reactions: Enthalpy (Free Energy) in Hartree, B3LYP/6-31+G(d), 298K .....                        | 10 |
| Detailed Coordinates Information .....                                                                                            | 11 |
| 1+.log .....                                                                                                                      | 11 |
| 1H.log .....                                                                                                                      | 12 |
| 1a+.log .....                                                                                                                     | 13 |
| 1aH.log .....                                                                                                                     | 14 |
| 1aH_tropylium.log .....                                                                                                           | 15 |
| 1a_carbene_s.log .....                                                                                                            | 16 |
| 1a_carbene_t.log .....                                                                                                            | 17 |
| 1a-D+.log .....                                                                                                                   | 18 |
| 1aH-D.log .....                                                                                                                   | 19 |
| 1b+.log .....                                                                                                                     | 20 |
| 1bH.log .....                                                                                                                     | 21 |
| 1b+_tropylium_1.log .....                                                                                                         | 22 |
| 1b+_tropylium_2.log .....                                                                                                         | 23 |
| 1b_carbene_s.log .....                                                                                                            | 24 |
| b_carbene_t.log .....                                                                                                             | 25 |
| 1c+_a.log .....                                                                                                                   | 27 |
| 1c+_b.log .....                                                                                                                   | 28 |
| 1cH.log .....                                                                                                                     | 29 |
| 1c+_a_tropylium_1.log .....                                                                                                       | 30 |
| 1c+_b_tropylium_1.log .....                                                                                                       | 31 |
| 1c+_a_tropylium_2.log .....                                                                                                       | 32 |
| 1c+_b_tropylium_2.log .....                                                                                                       | 33 |
| 1c_carbene_s.log .....                                                                                                            | 34 |
| 1c_carbene_t.log .....                                                                                                            | 35 |
| 1d+.log .....                                                                                                                     | 36 |
| 1dH.log .....                                                                                                                     | 37 |
| 1dH_tropylium_1.log .....                                                                                                         | 38 |
| 1dH_tropylium_2.log .....                                                                                                         | 39 |
| 1d_carbene_s.log .....                                                                                                            | 40 |
| 1d_carbene_t.log .....                                                                                                            | 41 |
| 1e+.log .....                                                                                                                     | 42 |

|                          |    |
|--------------------------|----|
| 1eH.log.....             | 43 |
| 1e_tropylium_1.log.....  | 44 |
| 1e_tropylium_2.log.....  | 45 |
| 1e_carbene_s.log.....    | 46 |
| 1e_carbene_t.log.....    | 47 |
| 1f+.log.....             | 48 |
| 1fH.log.....             | 49 |
| 1f+_tropylium_1.log..... | 50 |
| 1f+_tropylium_2.log..... | 51 |
| 1f_carbene_s.log.....    | 52 |
| 1f_carbene_t.log.....    | 53 |
| 1g+.log.....             | 54 |
| 1gH.log.....             | 55 |
| 1g_tropylium_1.log.....  | 56 |
| 1g_tropylium_2.log.....  | 57 |
| 1g_carbene_s.log.....    | 58 |
| 1g_carbene_t.log.....    | 59 |
| 2.log.....               | 60 |
| 2+.log.....              | 61 |
| 3.log.....               | 62 |
| 3+.log.....              | 63 |
| 4.log.....               | 65 |
| 4+.log.....              | 66 |
| 5.log.....               | 67 |
| 5+.log.....              | 68 |
| TMS.log.....             | 69 |
| TMS+.log.....            | 69 |
| H-.log.....              | 70 |
| H2.log.....              | 71 |
| toluene.log.....         | 71 |
| benzyl-cation.log.....   | 72 |
| benzene.log.....         | 73 |
| o-tolCH2+.log.....       | 74 |
| m-tolCH2+.log.....       | 75 |
| p-tolCH2+.log.....       | 75 |
| o-CH3Ph2CH+.log.....     | 76 |
| m-CH3Ph2CH+.log.....     | 77 |
| p-CH3Ph2CH+.log.....     | 78 |
| C6F5H.log.....           | 80 |

|                                                                                                            |    |
|------------------------------------------------------------------------------------------------------------|----|
| o-CH <sub>3</sub> Ph <sub>2</sub> CHF <sub>5</sub> +.log .....                                             | 80 |
| m-CH <sub>3</sub> Ph <sub>2</sub> CHF <sub>5</sub> +.log .....                                             | 81 |
| p-CH <sub>3</sub> Ph <sub>2</sub> CHF <sub>5</sub> +.log .....                                             | 82 |
| 3+_smd(CH <sub>2</sub> Cl <sub>2</sub> ).log .....                                                         | 84 |
| 4+_smd(CH <sub>2</sub> Cl <sub>2</sub> ).log .....                                                         | 85 |
| Spectra example for reaction: C <sub>6</sub> D <sub>5</sub> CD <sub>2</sub> <sup>+</sup> and toluene ..... | 87 |
| Spectra example #1: reaction between 3 and 1a-D:.....                                                      | 88 |
| Plot of the kinetics #1: reaction between 3 and 1a-D: .....                                                | 89 |
| Spectra example #2: reaction between 4 and 1c:.....                                                        | 90 |
| Plot of the kinetics #2: reaction between 4 and 1c: .....                                                  | 91 |

## Calculated Structures

Calculated Structures of Electrophiles: Enthalpy (Free Energy) in Hartree, B3LYP/6-31+G(d), 298K

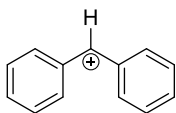

**1+**  
-501.553785  
(-501.601149)  
amarel/aek119/home/SiH/11083.log

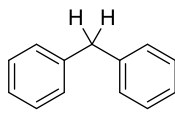

**1H**  
-502.412764  
(-502.463150)  
fen2/yn81/home/Notebook\_2/208909.log

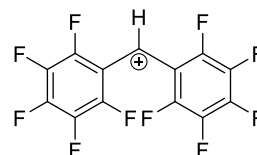

**1a+**  
-1493.919169  
(-1493.986819)  
amarel/aek119/home/SiH/11083f.log

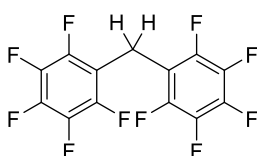

**1aH**  
-1494.829795  
(-1494.899353)  
amarel/aek119/home/SiH/11235.log

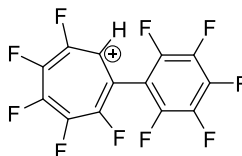

**1aH\_tropylium**  
-1493.502359  
(-1493.985193)  
amarel/jx112/home/ch2p0906.log

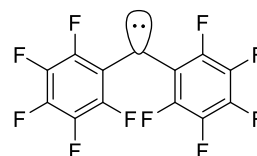

**1a\_carbene\_s**  
-1493.526917  
(-1493.595420)  
amarel/aek119/home/SiH/11231s.log

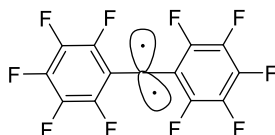

**1a\_carbene\_t**  
-1493.538761  
(-1493.609785)  
amarel/aek119/home/SiH/11231t.log

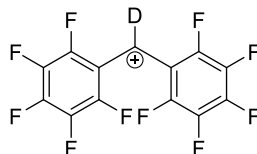

**1aD+**  
-1493.922396  
(-1493.990284)  
amarel/aek119/home/SiH/11152.log

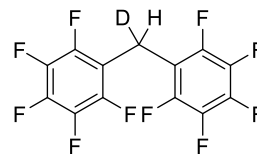

**1aDH**  
-1494.833092  
(-1494.902864)  
amarel/aek119/home/SiH/10752.log

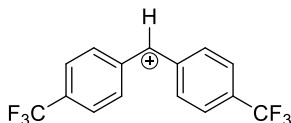

**1b+**  
-1175.631576  
(-1175.700884)  
amarel/aek119/home/SiH/20052.log

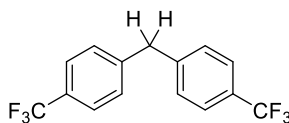

**1bH**  
-1176.517891  
(-1176.590508)  
amarel/aek119/home/SiH/20051.log

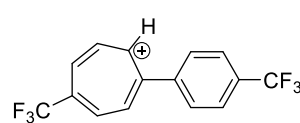

**1b+\_tropylium\_1**  
-1175.623071  
(-1175.690799)  
amarel/aek119/home/SiH/20071.log

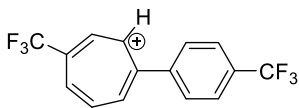

**1b+ tropylium\_2**  
 -1175.623114  
 (-1175.691108)  
 amarel/aek119/home/SiH/20072-v2.log

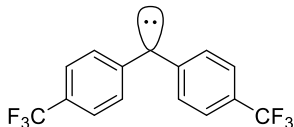

**1b carbene\_s**  
 -1175.221133  
 (-1175.291282)  
 amarel/aek119/home/SiH/20061s.log

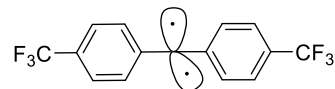

**1b carbene\_t**  
 -1175.232824  
 (-1175.304317)  
 amarel/aek/home/SiH/20061t-v2.log

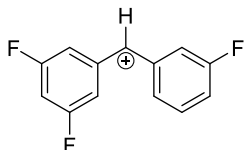

**1c+ a**  
 -799.278045  
 (-799.331695)  
 amarel/aek119/home/SiH/20054.log

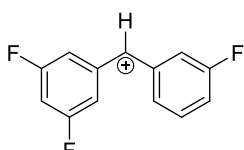

**1c+ b**  
**-799.278596**  
 (-799.332253)  
 amarel/jx112/home/353F\_1.log

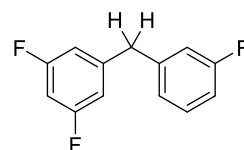

**1cH**  
 -800.160793  
 (-800.217196)  
 amarel/aek119/home/SiH/20053b.log

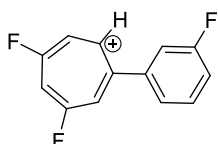

**1c+ a tropylium\_1**  
 -799.279029  
 (-799.332037)  
 amarel/aek119/home/SiH/20081.log

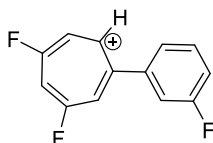

**1c+ b tropylium\_1**  
 -799.278986  
 (-799.331990)  
 amarel/aek119/home/SiH/20082.log

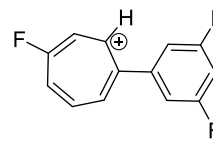

**1c+ a tropylium\_2**  
 -799.278089  
 (-799.331197)  
 amarel/aek119/home/SiH/20085.log

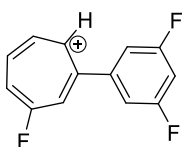

**1c+ b tropylium\_2**  
 -799.278367  
 (-799.331451)  
 amarel/aek119/home/SiH/20086.log

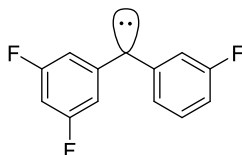

**1c carbene\_s**  
 -798.864848  
 (-798.918735)  
 amarel/aek119/home/SiH/20062s.log

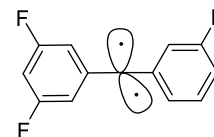

**1c carbene\_t**  
 -798.874638  
 (-798.930515)  
 amarel/aek/home/SiH/20062t.log

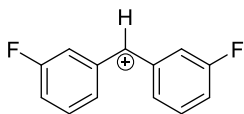

**1d+**  
 -700.038233  
 (-700.089815)  
 amarel/jx112/home/prf/1gb.log

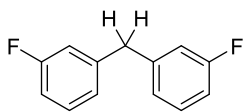

**1dH**  
 -700.038233  
 (-700.089815)  
 amarel/aek119/home/SiH/10754.log

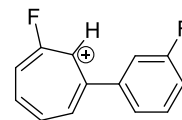

**1d+ tropylium\_1**  
 -700.035461  
 (-700.086438)  
 amarel/jx112/home/prf/1g\_3.log

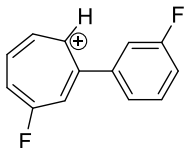

**1d+\_tropylum\_2**  
-700.035528  
(-700.086476)  
amarel/jx112/home/prf/1g\_4.log

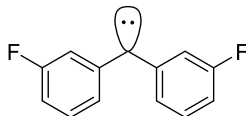

**1d\_carbene\_s**  
-699.617481  
(-699.669208)  
amarel/aek119/home/SiH/11233s.log

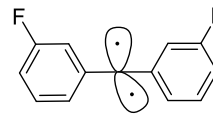

**1d\_carbene\_t**  
-699.627022  
(-699.680794)  
amarel/aek/home/SiH/1123t.log

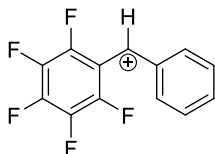

**1e+**  
-997.737050  
(-997.795056)  
amarel/jx112/home/prf/1h.log

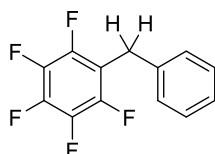

**1eH**  
-998.623471  
(-998.683523)  
amarel/aek119/home/SiH/10753.log

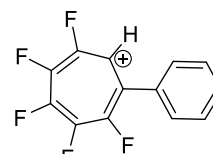

**1e+\_tropylum\_1**  
-997.731558  
(-997.788369)  
amarel/jx112/home/prf/1h\_1.log

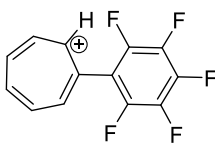

**1e+\_tropylum\_2**  
-997.734614  
(-997.791993)  
amarel/jx112/home/prf/1h\_2.log

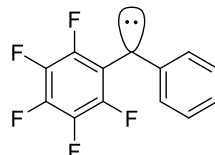

**1e\_carbene\_s**  
-997.324206  
(-997.382556)  
amarel/aek119/home/SiH/11232s-v2.log

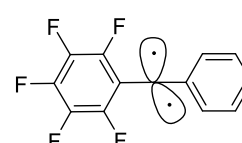

**1e\_carbene\_t**  
-997.334990  
(-997.395457)  
amarel/aek/home/SiH/11232t.log

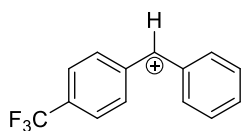

**1f+**  
-838.593080  
(-838.651576)  
amarel/aek119/home/SiH/20056.log

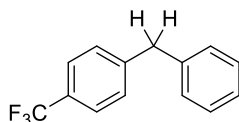

**1fH**  
-839.465753  
(-839.526986)  
amarel/aek119/home/SiH/20055.log

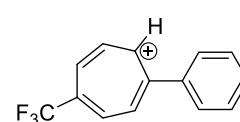

**1f+\_tropylum\_1**  
-838.581459  
(-838.638176)  
amarel/aek119/home/SiH/20074.log

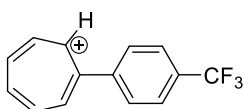

**1f+\_tropylum\_2**  
-838.588479  
(-838.646693)  
amarel/aek119/home/SiH/20075-v2.log

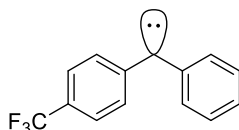

**1f\_carbene\_s**  
-838.171639  
(-838.230244)  
amarel/aek119/home/SiH/20063s-v2.log

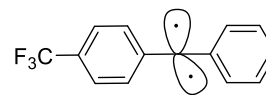

**1f\_carbene\_t**  
-838.181278  
(-838.241954)  
amarel/aek/home/SiH/20063t.log

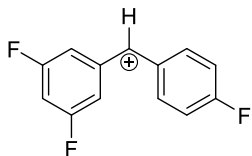

**1g+**  
-799.284265  
(-799.337905)  
amarel/aek119/home/SiH/10745.log

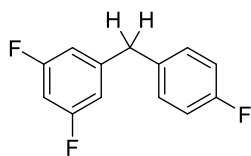

**1gH**  
-800.160383  
(-800.216385)  
amarel/aek119/home/SiH/10755.log

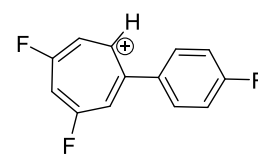

**1g+\_tropylium\_1**  
-799.278089  
(-799.331196)  
amarel/jx112/home/prf/1i\_1.log

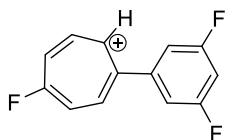

**1g+\_tropylium\_2**  
-799.281053  
(-799.334024)  
amarel/jx112/home/prf/1i\_2.log

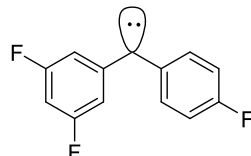

**1g\_carbene\_s**  
-798.867323  
(-798.921156)  
amarel/aek119/home/SiH/11234s-v2.log

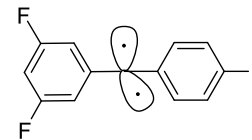

**1g\_carbene\_t**  
-798.874885  
(-798.930797)  
amarel/aek/home/SiH/11234t.log



Calculated Structures of Silane Hydrides: Enthalpy (Free Energy)  
in Hartree, B3LYP/6-31+G(d), 298K

|                                                                                    |                                                                                  |                                                                                   |
|------------------------------------------------------------------------------------|----------------------------------------------------------------------------------|-----------------------------------------------------------------------------------|
|                                                                                    |                                                                                  |                                                                                   |
| <b>2</b><br>-601.426263<br>(-601.474541)<br>amarel/aek119/home/SiH/11093.log       | <b>2+</b><br>-600.566312<br>(-600.615147)<br>amarel/aek119/home/SiH/11194.log    | <b>3</b><br>-645.427584<br>(-645.485566)<br>amarel/aek119/home/SiH/11092-v2.log   |
|                                                                                    |                                                                                  |                                                                                   |
| <b>3+</b><br>-644.564522<br>(-644.625603)<br>amarel/aek119/home/SiH/11195-v2.log   | <b>4</b><br>-527.583593<br>(-527.634286)<br>fen2/yn81/home/Notebook_2/209008.log | <b>4+</b><br>-526.714786<br>(-526.766500)<br>amarel/aek119/home/SiH/11192-v2.log  |
|                                                                                    |                                                                                  |                                                                                   |
| <b>5</b><br>-854.330901<br>(-854.391204)<br>amarel/aek119/home/SiH/11094-v4.log    | <b>5+</b><br>-853.472965<br>(-853.533144)<br>amarel/aek119/home/SiH/11193-v2.log | <b>TMS</b><br>-409.743653<br>(-409.781434)<br>amarel/aek119/home/SiH/11103.log    |
|                                                                                    |                                                                                  |                                                                                   |
| <b>TMS+</b><br>-408.867156<br>(-408.908670)<br>amarel/aek119/home/SiH/11112-v2.log | <b>H-</b><br>-0.459456<br>(-0.471816)<br>amarel/aek119/home/SiH/H-.log           | <b>H<sub>2</sub></b><br>-1.162033<br>(-1.176825)<br>amarel/aek119/home/SiH/H2.log |

Calculated Structures of Silane Hydrides: Enthalpy (Free Energy)  
in Hartree, B3LYP/6-31+G(d), scrf=(smd,solvent=methylene  
chloride), 298K

|                                                                                                                                                    |                                                                                                                                                    |
|----------------------------------------------------------------------------------------------------------------------------------------------------|----------------------------------------------------------------------------------------------------------------------------------------------------|
|                                                                                                                                                    |                                                                                                                                                    |
| <b>3+_smd(CH<sub>2</sub>Cl<sub>2</sub>)</b><br>-644.646124<br>(-644.704179)<br>amarel/aek119/home/SiH/3+_smd(CH <sub>2</sub> Cl <sub>2</sub> ).log | <b>4+_smd(CH<sub>2</sub>Cl<sub>2</sub>)</b><br>-526.799060<br>(-526.849092)<br>amarel/aek119/home/SiH/4+_smd(CH <sub>2</sub> Cl <sub>2</sub> ).log |

Calculated Structures of Table 4 Reactions: Enthalpy (Free Energy)  
in Hartree, B3LYP/6-31+G(d), 298K

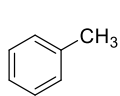

**toluene**  
-271.442102  
(-271.480127)  
amarel/aek119/home/SiH/11200.log

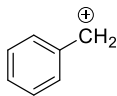

**benzyl-cation**  
-270.542638  
(-270.578378)  
amarel/aek119/home/SiH/11201.log

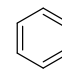

**benzene**  
-232.153031  
(-232.185843)  
amarel/aek119/home/SiH/11202.log

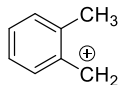

**o-tolCH2+**  
-309.837554  
(-309.877221)  
amarel/aek119/home/SiH/12203\_o.log

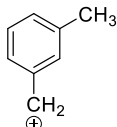

**m-tolCH2+**  
-309.836975  
(-309.876928)  
amarel/aek119/home/SiH/12203\_m.log

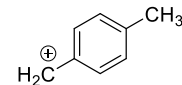

**p-tolCH2+**  
-309.843430  
(-309.884269)  
amarel/aek119/home/SiH/12203-v2\_p.log

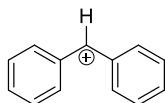

**1+**  
-501.553785  
(-501.601149)  
amarel/aek119/home/SiH/11083.log

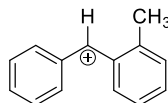

**o-CH3Ph2CH+**  
-540.843933  
(-540.894751)  
amarel/aek119/home/SiH/11205\_o.log

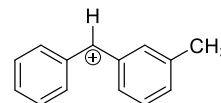

**m-CH3Ph2CH+**  
-540.846126  
(-540.897891)  
amarel/aek119/home/SiH/11205\_m.log

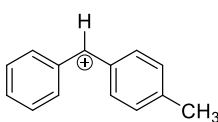

**p-CH3Ph2CH+**  
-540.849757  
(-540.902992)  
amarel/aek119/home/SiH/11205\_p.log

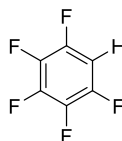

**C6F5H**  
-728.362866  
(-728.406395)  
amarel/aek119/home/SiH/11214.log

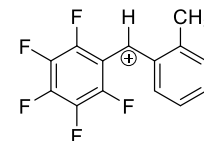

**o-CH3Ph2CHF5+**  
-1037.028105  
(-1037.089506)  
amarel/aek119/home/SiH/11215\_o.log

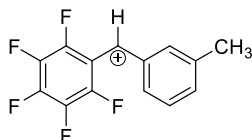

**m-CH3Ph2CHF5+**  
-1037.030010  
(-1037.092326)  
amarel/aek119/home/SiH/11215\_m.log

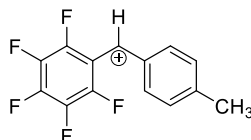

**p-CH3Ph2CHF5+**  
-1037.034763  
(-1037.098379)  
amarel/aek119/home/SiH/11215\_p.log

## Detailed Coordinates Information

1+.log

SCF Done: E(RB3LYP) = -501.764426403 A.U. after 1 cycles

Zero-point correction= 0.199756  
(Hartree/Particle)  
Thermal correction to Energy= 0.209752  
Thermal correction to Enthalpy= 0.210696  
Thermal correction to Gibbs Free Energy= 0.163394  
Sum of electronic and zero-point Energies= -501.564671  
Sum of electronic and thermal Energies= -501.554674  
Sum of electronic and thermal Enthalpies= -501.553730  
Sum of electronic and thermal Free Energies= -501.601032

|       | E (Thermal) | CV             | S              |
|-------|-------------|----------------|----------------|
|       | KCal/Mol    | Cal/Mol-Kelvin | Cal/Mol-Kelvin |
| Total | 131.621     | 40.246         | 99.555         |

| Center<br>Number | Atomic<br>Number | Atomic<br>Type | Coordinates (Angstroms) |           |           |
|------------------|------------------|----------------|-------------------------|-----------|-----------|
|                  |                  |                | X                       | Y         | Z         |
| 1                | 6                | 0              | 3.688206                | -0.770388 | -0.305626 |
| 2                | 6                | 0              | 2.395252                | -1.267522 | -0.280249 |
| 3                | 6                | 0              | 1.292624                | -0.417236 | 0.036345  |
| 4                | 6                | 0              | 1.558510                | 0.935615  | 0.404147  |
| 5                | 6                | 0              | 2.857000                | 1.415111  | 0.400774  |
| 6                | 6                | 0              | 3.919414                | 0.571270  | 0.031590  |
| 7                | 1                | 0              | 4.518223                | -1.417724 | -0.570456 |
| 8                | 1                | 0              | 2.206800                | -2.308014 | -0.531336 |
| 9                | 1                | 0              | 0.753981                | 1.572898  | 0.751819  |
| 10               | 1                | 0              | 3.059067                | 2.438124  | 0.702607  |
| 11               | 1                | 0              | 4.934893                | 0.957737  | 0.031655  |
| 12               | 6                | 0              | 0.000013                | -0.999508 | -0.000197 |
| 13               | 1                | 0              | 0.000026                | -2.090115 | -0.000277 |
| 14               | 6                | 0              | -1.292634               | -0.417257 | -0.036522 |
| 15               | 6                | 0              | -1.558571               | 0.935579  | -0.404313 |
| 16               | 6                | 0              | -2.395193               | -1.267540 | 0.280275  |
| 17               | 6                | 0              | -2.857070               | 1.415065  | -0.400777 |
| 18               | 1                | 0              | -0.754090               | 1.572844  | -0.752130 |
| 19               | 6                | 0              | -3.688139               | -0.770394 | 0.305883  |
| 20               | 1                | 0              | -2.206697               | -2.308030 | 0.531340  |
| 21               | 6                | 0              | -3.919415               | 0.571245  | -0.031364 |
| 22               | 1                | 0              | -3.059189               | 2.438056  | -0.702654 |
| 23               | 1                | 0              | -4.518102               | -1.417721 | 0.570906  |
| 24               | 1                | 0              | -4.934894               | 0.957710  | -0.031272 |

-----  
**1H.log**

SCF Done: E(RB3LYP) = -502.633957229 A.U. after 1 cycles

Zero-point correction= 0.209862  
(Hartree/Particle)  
Thermal correction to Energy= 0.220249  
Thermal correction to Enthalpy= 0.221193  
Thermal correction to Gibbs Free Energy= 0.170807  
Sum of electronic and zero-point Energies= -502.424095  
Sum of electronic and thermal Energies= -502.413708  
Sum of electronic and thermal Enthalpies= -502.412764  
Sum of electronic and thermal Free Energies= -502.463150

|       | E (Thermal) | CV             | S              |
|-------|-------------|----------------|----------------|
|       | KCal/Mol    | Cal/Mol-Kelvin | Cal/Mol-Kelvin |
| Total | 138.208     | 41.184         | 106.047        |

-----

| Center<br>Number | Atomic<br>Number | Atomic<br>Type | Coordinates (Angstroms) |           |           |
|------------------|------------------|----------------|-------------------------|-----------|-----------|
|                  |                  |                | X                       | Y         | Z         |
| 1                | 6                | 0              | 3.464438                | 0.857393  | 0.060591  |
| 2                | 6                | 0              | 2.276300                | 0.901613  | 0.798556  |
| 3                | 6                | 0              | 1.280647                | -0.067998 | 0.622516  |
| 4                | 6                | 0              | 1.502050                | -1.087612 | -0.316926 |
| 5                | 6                | 0              | 2.686056                | -1.137648 | -1.054117 |
| 6                | 6                | 0              | 3.673331                | -0.163352 | -0.868584 |
| 7                | 1                | 0              | 4.223327                | 1.620986  | 0.213618  |
| 8                | 1                | 0              | 2.123702                | 1.699575  | 1.522855  |
| 9                | 1                | 0              | 0.736777                | -1.844502 | -0.475521 |
| 10               | 1                | 0              | 2.838702                | -1.936900 | -1.775467 |
| 11               | 1                | 0              | 4.594954                | -0.201334 | -1.443821 |
| 12               | 6                | 0              | -0.000341               | -0.029991 | 1.442406  |
| 13               | 1                | 0              | -0.045213               | -0.919462 | 2.085029  |
| 14               | 1                | 0              | 0.044021                | 0.831993  | 2.121544  |
| 15               | 6                | 0              | -1.280825               | 0.042034  | 0.623829  |
| 16               | 6                | 0              | -2.279779               | -0.929968 | 0.764633  |
| 17               | 6                | 0              | -1.498728               | 1.095838  | -0.277907 |
| 18               | 6                | 0              | -3.467661               | -0.855038 | 0.028775  |
| 19               | 1                | 0              | -2.130003               | -1.754203 | 1.459488  |
| 20               | 6                | 0              | -2.682452               | 1.176481  | -1.012887 |
| 21               | 1                | 0              | -0.730854               | 1.855374  | -0.408713 |
| 22               | 6                | 0              | -3.672989               | 0.199363  | -0.862817 |
| 23               | 1                | 0              | -4.229110               | -1.621160 | 0.153911  |

|    |   |   |           |          |           |
|----|---|---|-----------|----------|-----------|
| 24 | 1 | 0 | -2.832256 | 2.001783 | -1.704896 |
| 25 | 1 | 0 | -4.594325 | 0.261170 | -1.436447 |

---

**1a+.log**

SCF Done: E(RB3LYP) = -1494.05607015 A.U. after 1 cycles

Zero-point correction= 0.116993  
(Hartree/Particle)  
Thermal correction to Energy= 0.135957  
Thermal correction to Enthalpy= 0.136901  
Thermal correction to Gibbs Free Energy= 0.069251  
Sum of electronic and zero-point Energies= -1493.939077  
Sum of electronic and thermal Energies= -1493.920113  
Sum of electronic and thermal Enthalpies= -1493.919169  
Sum of electronic and thermal Free Energies= -1493.986819

|       | E (Thermal) | CV             | S              |
|-------|-------------|----------------|----------------|
|       | KCal/Mol    | Cal/Mol-Kelvin | Cal/Mol-Kelvin |
| Total | 85.314      | 69.857         | 142.381        |

---

| Center<br>Number | Atomic<br>Number | Atomic<br>Type | Coordinates (Angstroms) |           |           |
|------------------|------------------|----------------|-------------------------|-----------|-----------|
|                  |                  |                | X                       | Y         | Z         |
| 1                | 6                | 0              | 3.957167                | 0.418297  | -0.119385 |
| 2                | 6                | 0              | 2.917264                | 1.242110  | -0.585771 |
| 3                | 6                | 0              | 1.613131                | 0.787721  | -0.532836 |
| 4                | 6                | 0              | 1.287687                | -0.505439 | -0.017019 |
| 5                | 6                | 0              | 2.390188                | -1.325105 | 0.391417  |
| 6                | 6                | 0              | 3.694856                | -0.872155 | 0.371166  |
| 7                | 6                | 0              | 0.000143                | -1.085379 | -0.000543 |
| 8                | 1                | 0              | 0.000210                | -2.173689 | -0.000739 |
| 9                | 6                | 0              | -1.287557               | -0.505265 | 0.016534  |
| 10               | 6                | 0              | -1.613020               | 0.787751  | 0.532607  |
| 11               | 6                | 0              | -2.390343               | -1.324970 | -0.391603 |
| 12               | 6                | 0              | -2.917166               | 1.242175  | 0.585509  |
| 13               | 6                | 0              | -3.695034               | -0.872107 | -0.371051 |
| 14               | 6                | 0              | -3.957254               | 0.418428  | 0.119408  |
| 15               | 9                | 0              | -3.204146               | 2.429517  | 1.098612  |
| 16               | 9                | 0              | -0.665764               | 1.541775  | 1.075737  |
| 17               | 9                | 0              | -5.193023               | 0.855699  | 0.160743  |
| 18               | 9                | 0              | -4.693682               | -1.630622 | -0.796441 |
| 19               | 9                | 0              | -2.143311               | -2.544367 | -0.855522 |
| 20               | 9                | 0              | 0.665898                | 1.542071  | -1.075683 |
| 21               | 9                | 0              | 3.204312                | 2.429529  | -1.098568 |

|    |   |   |          |           |           |
|----|---|---|----------|-----------|-----------|
| 22 | 9 | 0 | 5.193014 | 0.855469  | -0.160257 |
| 23 | 9 | 0 | 4.693459 | -1.630486 | 0.797011  |
| 24 | 9 | 0 | 2.143179 | -2.544439 | 0.855495  |

---

### 1aH.log

SCF Done: E(RB3LYP) = -1494.97821325 A.U. after 1 cycles

Zero-point correction= 0.128088  
(Hartree/Particle)  
Thermal correction to Energy= 0.147474  
Thermal correction to Enthalpy= 0.148419  
Thermal correction to Gibbs Free Energy= 0.078860  
Sum of electronic and zero-point Energies= -1494.850125  
Sum of electronic and thermal Energies= -1494.830739  
Sum of electronic and thermal Enthalpies= -1494.829795  
Sum of electronic and thermal Free Energies= -1494.899353

|       | E (Thermal) | CV             | S              |
|-------|-------------|----------------|----------------|
|       | KCal/Mol    | Cal/Mol-Kelvin | Cal/Mol-Kelvin |
| Total | 92.542      | 71.085         | 146.398        |

---

| Center<br>Number | Atomic<br>Number | Atomic<br>Type | Coordinates (Angstroms) |           |           |
|------------------|------------------|----------------|-------------------------|-----------|-----------|
|                  |                  |                | X                       | Y         | Z         |
| 1                | 6                | 0              | 2.676140                | -1.340144 | -0.730740 |
| 2                | 6                | 0              | 1.518522                | -1.215794 | 0.031742  |
| 3                | 6                | 0              | 1.269375                | -0.108831 | 0.847173  |
| 4                | 6                | 0              | 2.254651                | 0.880833  | 0.870696  |
| 5                | 6                | 0              | 3.425538                | 0.785374  | 0.120775  |
| 6                | 6                | 0              | 3.635616                | -0.330231 | -0.685714 |
| 7                | 6                | 0              | 0.000013                | 0.000143  | 1.674480  |
| 8                | 6                | 0              | -1.269360               | 0.108991  | 0.847167  |
| 9                | 6                | 0              | -2.254539               | -0.880769 | 0.870761  |
| 10               | 6                | 0              | -1.518599               | 1.215888  | 0.031674  |
| 11               | 6                | 0              | -3.425455               | -0.785426 | 0.120866  |
| 12               | 6                | 0              | -2.676245               | 1.340119  | -0.730781 |
| 13               | 6                | 0              | -3.635634               | 0.330122  | -0.685665 |
| 14               | 9                | 0              | 0.611651                | -2.211289 | -0.024160 |
| 15               | 9                | 0              | 2.875093                | -2.419744 | -1.499103 |
| 16               | 9                | 0              | 4.754741                | -0.434725 | -1.410774 |
| 17               | 9                | 0              | 4.346995                | 1.756674  | 0.171956  |
| 18               | 9                | 0              | 2.093737                | 1.972013  | 1.643127  |
| 19               | 9                | 0              | -0.611794               | 2.211433  | -0.024300 |
| 20               | 9                | 0              | -2.875308               | 2.419647  | -1.499199 |

|    |   |   |           |           |           |
|----|---|---|-----------|-----------|-----------|
| 21 | 9 | 0 | -4.754796 | 0.434484  | -1.410701 |
| 22 | 9 | 0 | -4.346844 | -1.756794 | 0.172093  |
| 23 | 9 | 0 | -2.093492 | -1.971922 | 1.643190  |
| 24 | 1 | 0 | -0.083884 | -0.875881 | 2.323152  |
| 25 | 1 | 0 | 0.083905  | 0.876233  | 2.323065  |

---

### 1aH\_tropylium.log

SCF Done: E(RB3LYP) = -1494.05501739 A.U. after 2 cycles

Zero-point correction= 0.117225  
(Hartree/Particle)  
Thermal correction to Energy= 0.135990  
Thermal correction to Enthalpy= 0.136934  
Thermal correction to Gibbs Free Energy= 0.069824  
Sum of electronic and zero-point Energies= -1493.937792  
Sum of electronic and thermal Energies= -1493.919028  
Sum of electronic and thermal Enthalpies= -1493.918084  
Sum of electronic and thermal Free Energies= -1493.985193

|       | E (Thermal) | CV             | S              |
|-------|-------------|----------------|----------------|
|       | KCal/Mol    | Cal/Mol-Kelvin | Cal/Mol-Kelvin |
| Total | 85.335      | 69.411         | 141.245        |

---

| Center<br>Number | Atomic<br>Number | Atomic<br>Type | Coordinates (Angstroms) |           |           |
|------------------|------------------|----------------|-------------------------|-----------|-----------|
|                  |                  |                | X                       | Y         | Z         |
| 1                | 6                | 0              | -2.465151               | -1.321708 | -0.557899 |
| 2                | 6                | 0              | -1.094035               | -1.041278 | -0.483187 |
| 3                | 6                | 0              | -1.064194               | 1.253383  | 0.497302  |
| 4                | 6                | 0              | -2.414500               | 1.557343  | 0.624160  |
| 5                | 6                | 0              | -3.546988               | 0.771644  | 0.342412  |
| 6                | 6                | 0              | -3.560454               | -0.522721 | -0.181817 |
| 7                | 6                | 0              | -0.424378               | 0.097221  | 0.023298  |
| 8                | 6                | 0              | 1.055132                | 0.080332  | 0.028374  |
| 9                | 6                | 0              | 1.795108                | 1.135407  | -0.537424 |
| 10               | 6                | 0              | 1.780303                | -0.971870 | 0.617060  |
| 11               | 6                | 0              | 3.184306                | 1.137774  | -0.540819 |
| 12               | 6                | 0              | 3.169631                | -0.981341 | 0.639898  |
| 13               | 6                | 0              | 3.873563                | 0.074701  | 0.052285  |
| 14               | 1                | 0              | -0.418792               | 2.054194  | 0.847225  |
| 15               | 9                | 0              | 1.149854                | 2.153864  | -1.127318 |
| 16               | 9                | 0              | 3.855311                | 2.135288  | -1.106215 |
| 17               | 9                | 0              | 5.195317                | 0.072364  | 0.063602  |
| 18               | 9                | 0              | 3.826716                | -1.976445 | 1.224805  |

|    |   |   |           |           |           |
|----|---|---|-----------|-----------|-----------|
| 19 | 9 | 0 | 1.120927  | -1.967542 | 1.221961  |
| 20 | 9 | 0 | -0.342036 | -2.002078 | -0.994087 |
| 21 | 9 | 0 | -2.786564 | -2.490585 | -1.075182 |
| 22 | 9 | 0 | -4.747290 | -1.060442 | -0.366749 |
| 23 | 9 | 0 | -4.720845 | 1.307562  | 0.598424  |
| 24 | 9 | 0 | -2.697085 | 2.753847  | 1.117528  |

---

### 1a\_carbene\_s.log

SCF Done: E(RB3LYP) = -1493.64935037 A.U. after 1 cycles

Zero-point correction= 0.102301  
(Hartree/Particle)  
Thermal correction to Energy= 0.121489  
Thermal correction to Enthalpy= 0.122433  
Thermal correction to Gibbs Free Energy= 0.053931  
Sum of electronic and zero-point Energies= -1493.547049  
Sum of electronic and thermal Energies= -1493.527862  
Sum of electronic and thermal Enthalpies= -1493.526917  
Sum of electronic and thermal Free Energies= -1493.595420

|       | E (Thermal) | CV             | S              |
|-------|-------------|----------------|----------------|
|       | KCal/Mol    | Cal/Mol-Kelvin | Cal/Mol-Kelvin |
| Total | 76.235      | 70.039         | 144.175        |

---

| Center<br>Number | Atomic<br>Number | Atomic<br>Type | Coordinates (Angstroms) |           |           |
|------------------|------------------|----------------|-------------------------|-----------|-----------|
|                  |                  |                | X                       | Y         | Z         |
| 1                | 6                | 0              | 2.853807                | -1.102619 | -0.837325 |
| 2                | 6                | 0              | 1.559659                | -0.631392 | -0.686994 |
| 3                | 6                | 0              | 1.254078                | 0.572823  | 0.011639  |
| 4                | 6                | 0              | 2.374596                | 1.241669  | 0.589122  |
| 5                | 6                | 0              | 3.664827                | 0.741712  | 0.510627  |
| 6                | 6                | 0              | 3.908217                | -0.424692 | -0.219750 |
| 7                | 6                | 0              | -0.000012               | 1.241163  | -0.000032 |
| 8                | 6                | 0              | -1.254093               | 0.572777  | -0.011796 |
| 9                | 6                | 0              | -1.559595               | -0.631373 | 0.686897  |
| 10               | 6                | 0              | -2.374639               | 1.241630  | -0.589132 |
| 11               | 6                | 0              | -2.853733               | -1.102640 | 0.837294  |
| 12               | 6                | 0              | -3.664863               | 0.741640  | -0.510607 |
| 13               | 6                | 0              | -3.908191               | -0.424748 | 0.219786  |
| 14               | 9                | 0              | 0.580198                | -1.320272 | -1.288340 |
| 15               | 9                | 0              | 3.105481                | -2.216049 | -1.538545 |
| 16               | 9                | 0              | 5.150220                | -0.892276 | -0.328506 |
| 17               | 9                | 0              | 4.687316                | 1.377860  | 1.095776  |



|    |   |   |           |           |           |
|----|---|---|-----------|-----------|-----------|
| 18 | 9 | 0 | 2.187199  | 2.372163  | 1.266997  |
| 19 | 9 | 0 | -2.187387 | 2.372192  | -1.266980 |
| 20 | 9 | 0 | -4.687391 | 1.377799  | -1.095712 |
| 21 | 9 | 0 | -5.150206 | -0.892359 | 0.328667  |
| 22 | 9 | 0 | -3.105323 | -2.216060 | 1.538563  |
| 23 | 9 | 0 | -0.580144 | -1.320298 | 1.288262  |

---

### 1a\_carbene\_t.log

SCF Done: E(UB3LYP) = -1493.66069607 A.U. after 1 cycles

Zero-point correction= 0.101462  
(Hartree/Particle)  
Thermal correction to Energy= 0.120991  
Thermal correction to Enthalpy= 0.121935  
Thermal correction to Gibbs Free Energy= 0.050911  
Sum of electronic and zero-point Energies= -1493.559235  
Sum of electronic and thermal Energies= -1493.539705  
Sum of electronic and thermal Enthalpies= -1493.538761  
Sum of electronic and thermal Free Energies= -1493.609785

|       | E (Thermal) | CV             | S              |
|-------|-------------|----------------|----------------|
|       | KCal/Mol    | Cal/Mol-Kelvin | Cal/Mol-Kelvin |
| Total | 75.923      | 70.738         | 149.483        |

---

| Center<br>Number | Atomic<br>Number | Atomic<br>Type | Coordinates (Angstroms) |           |           |
|------------------|------------------|----------------|-------------------------|-----------|-----------|
|                  |                  |                | X                       | Y         | Z         |
| 1                | 6                | 0              | 3.084782                | -1.113376 | 0.770316  |
| 2                | 6                | 0              | 1.755016                | -0.732891 | 0.712068  |
| 3                | 6                | 0              | 1.328248                | 0.439887  | 0.024308  |
| 4                | 6                | 0              | 2.357506                | 1.209644  | -0.587125 |
| 5                | 6                | 0              | 3.690639                | 0.839276  | -0.529915 |
| 6                | 6                | 0              | 4.060556                | -0.325819 | 0.150064  |
| 7                | 6                | 0              | 0.000004                | 0.856597  | -0.000085 |
| 8                | 6                | 0              | -1.328240               | 0.439845  | -0.024354 |
| 9                | 6                | 0              | -2.357444               | 1.209635  | 0.587103  |
| 10               | 6                | 0              | -1.755056               | -0.732906 | -0.712095 |
| 11               | 6                | 0              | -3.690588               | 0.839299  | 0.529934  |
| 12               | 6                | 0              | -3.084837               | -1.113374 | -0.770304 |
| 13               | 6                | 0              | -4.060570               | -0.325770 | -0.150053 |
| 14               | 9                | 0              | 0.837759                | -1.494154 | 1.327365  |
| 15               | 9                | 0              | 3.449094                | -2.225072 | 1.422579  |
| 16               | 9                | 0              | 5.344739                | -0.687089 | 0.206543  |
| 17               | 9                | 0              | 4.631440                | 1.583911  | -1.124763 |

|    |   |   |           |           |           |
|----|---|---|-----------|-----------|-----------|
| 18 | 9 | 0 | 2.025502  | 2.325685  | -1.249912 |
| 19 | 9 | 0 | -0.837846 | -1.494221 | -1.327400 |
| 20 | 9 | 0 | -3.449172 | -2.225066 | -1.422545 |
| 21 | 9 | 0 | -5.344767 | -0.686982 | -0.206484 |
| 22 | 9 | 0 | -4.631355 | 1.583958  | 1.124817  |
| 23 | 9 | 0 | -2.025404 | 2.325663  | 1.249894  |

---

### 1a-D+.log

SCF Done: E(RB3LYP) = -1494.05607034 A.U. after 1 cycles

Zero-point correction= 0.113624  
(Hartree/Particle)  
Thermal correction to Energy= 0.132730  
Thermal correction to Enthalpy= 0.133674  
Thermal correction to Gibbs Free Energy= 0.065786  
Sum of electronic and zero-point Energies= -1493.942446  
Sum of electronic and thermal Energies= -1493.923340  
Sum of electronic and thermal Enthalpies= -1493.922396  
Sum of electronic and thermal Free Energies= -1493.990284

|       | E (Thermal) | CV             | S              |
|-------|-------------|----------------|----------------|
|       | KCal/Mol    | Cal/Mol-Kelvin | Cal/Mol-Kelvin |
| Total | 83.289      | 70.535         | 142.882        |

---

| Center<br>Number | Atomic<br>Number | Atomic<br>Type | Coordinates (Angstroms) |           |           |
|------------------|------------------|----------------|-------------------------|-----------|-----------|
|                  |                  |                | X                       | Y         | Z         |
| 1                | 6                | 0              | 2.916872                | -1.242266 | 0.585332  |
| 2                | 6                | 0              | 1.612734                | -0.787756 | 0.532352  |
| 3                | 6                | 0              | 1.287551                | 0.505463  | 0.016454  |
| 4                | 6                | 0              | 2.390266                | 1.325075  | -0.391526 |
| 5                | 6                | 0              | 3.694926                | 0.872073  | -0.370914 |
| 6                | 6                | 0              | 3.956997                | -0.418592 | 0.119287  |
| 7                | 6                | 0              | -0.000009               | 1.085653  | 0.000038  |
| 8                | 1                | 0              | -0.000023               | 2.174079  | 0.000033  |
| 9                | 6                | 0              | -1.287534               | 0.505492  | -0.016403 |
| 10               | 6                | 0              | -2.390313               | 1.325061  | 0.391531  |
| 11               | 6                | 0              | -1.612699               | -0.787732 | -0.532351 |
| 12               | 6                | 0              | -3.694961               | 0.872016  | 0.370910  |
| 13               | 6                | 0              | -2.916819               | -1.242256 | -0.585334 |
| 14               | 6                | 0              | -3.957020               | -0.418653 | -0.119300 |
| 15               | 9                | 0              | 2.143222                | 2.544669  | -0.854890 |
| 16               | 9                | 0              | 4.693668                | 1.630499  | -0.796147 |
| 17               | 9                | 0              | 5.192713                | -0.855987 | 0.160369  |

|    |   |   |           |           |           |
|----|---|---|-----------|-----------|-----------|
| 18 | 9 | 0 | 3.203651  | -2.429651 | 1.098388  |
| 19 | 9 | 0 | 0.665360  | -1.541487 | 1.075586  |
| 20 | 9 | 0 | -2.143358 | 2.544679  | 0.854888  |
| 21 | 9 | 0 | -4.693708 | 1.630433  | 0.796165  |
| 22 | 9 | 0 | -5.192700 | -0.856061 | -0.160446 |
| 23 | 9 | 0 | -3.203566 | -2.429661 | -1.098413 |
| 24 | 9 | 0 | -0.665272 | -1.541382 | -1.075553 |

1aH-D.log

SCF Done: E(RB3LYP) = -1494.97821324 A.U. after 1 cycles

Zero-point correction= 0.124664  
(Hartree/Particle)  
Thermal correction to Energy= 0.144177  
Thermal correction to Enthalpy= 0.145121  
Thermal correction to Gibbs Free Energy= 0.075349  
Sum of electronic and zero-point Energies= -1494.853549  
Sum of electronic and thermal Energies= -1494.834037  
Sum of electronic and thermal Enthalpies= -1494.833092  
Sum of electronic and thermal Free Energies= -1494.902864

|       | E (Thermal) | CV             | S              |
|-------|-------------|----------------|----------------|
|       | KCal/Mol    | Cal/Mol-Kelvin | Cal/Mol-Kelvin |
| Total | 90.472      | 71.707         | 146.847        |

| Center<br>Number | Atomic<br>Number | Atomic<br>Type | Coordinates (Angstroms) |           |           |
|------------------|------------------|----------------|-------------------------|-----------|-----------|
|                  |                  |                | X                       | Y         | Z         |
| 1                | 6                | 0              | -2.675931               | 1.340371  | -0.730410 |
| 2                | 6                | 0              | -1.518470               | 1.215895  | 0.032284  |
| 3                | 6                | 0              | -1.269368               | 0.108644  | 0.847340  |
| 4                | 6                | 0              | -2.254540               | -0.881133 | 0.870380  |
| 5                | 6                | 0              | -3.425277               | -0.785545 | 0.120221  |
| 6                | 6                | 0              | -3.635287               | 0.330305  | -0.685939 |
| 7                | 6                | 0              | -0.000058               | -0.000543 | 1.674742  |
| 8                | 1                | 0              | 0.083836                | 0.875253  | 2.323689  |
| 9                | 1                | 0              | -0.083980               | -0.876832 | 2.323033  |
| 10               | 6                | 0              | 1.269283                | -0.109159 | 0.847322  |
| 11               | 6                | 0              | 2.254168                | 0.880880  | 0.870604  |
| 12               | 6                | 0              | 1.518742                | -1.216201 | 0.032066  |
| 13               | 6                | 0              | 3.425000                | 0.785740  | 0.120512  |
| 14               | 6                | 0              | 2.676302                | -1.340240 | -0.730531 |
| 15               | 6                | 0              | 3.635393                | -0.329919 | -0.685789 |
| 16               | 9                | 0              | -2.093708               | -1.972484 | 1.642569  |

|    |   |   |           |           |           |
|----|---|---|-----------|-----------|-----------|
| 17 | 9 | 0 | -4.346671 | -1.756936 | 0.170919  |
| 18 | 9 | 0 | -4.754284 | 0.434938  | -1.411197 |
| 19 | 9 | 0 | -2.874899 | 2.420221  | -1.498415 |
| 20 | 9 | 0 | -0.611692 | 2.211512  | -0.023035 |
| 21 | 9 | 0 | 0.612196  | -2.212007 | -0.023533 |
| 22 | 9 | 0 | 2.875620  | -2.419873 | -1.498741 |
| 23 | 9 | 0 | 4.754455  | -0.434123 | -1.411014 |
| 24 | 9 | 0 | 4.346090  | 1.757411  | 0.171416  |
| 25 | 9 | 0 | 2.092936  | 1.972119  | 1.642861  |

### 1b+.log

SCF Done: E(RB3LYP) = -1175.85804880 A.U. after 1 cycles

Zero-point correction= 0.208080  
(Hartree/Particle)  
Thermal correction to Energy= 0.225529  
Thermal correction to Enthalpy= 0.226473  
Thermal correction to Gibbs Free Energy= 0.157165  
Sum of electronic and zero-point Energies= -1175.649969  
Sum of electronic and thermal Energies= -1175.632520  
Sum of electronic and thermal Enthalpies= -1175.631576  
Sum of electronic and thermal Free Energies= -1175.700884

|       | E (Thermal) | CV             | S              |
|-------|-------------|----------------|----------------|
|       | KCal/Mol    | Cal/Mol-Kelvin | Cal/Mol-Kelvin |
| Total | 141.521     | 65.782         | 145.872        |

| Center<br>Number | Atomic<br>Number | Atomic<br>Type | Coordinates (Angstroms) |           |           |
|------------------|------------------|----------------|-------------------------|-----------|-----------|
|                  |                  |                | X                       | Y         | Z         |
| 1                | 6                | 0              | -2.854990               | -0.866094 | -0.388027 |
| 2                | 6                | 0              | -1.559561               | -0.384925 | -0.399067 |
| 3                | 6                | 0              | -1.292767               | 0.967861  | -0.032004 |
| 4                | 6                | 0              | -2.392920               | 1.815118  | 0.291432  |
| 5                | 6                | 0              | -3.687390               | 1.318904  | 0.327357  |
| 6                | 6                | 0              | -3.915275               | -0.021260 | -0.008412 |
| 7                | 1                | 0              | -3.060358               | -1.889064 | -0.687465 |
| 8                | 1                | 0              | -0.759653               | -1.024577 | -0.752527 |
| 9                | 1                | 0              | -2.209033               | 2.856191  | 0.542276  |
| 10               | 1                | 0              | -4.516297               | 1.962585  | 0.599822  |
| 11               | 6                | 0              | 0.000009                | 1.552625  | 0.000004  |
| 12               | 1                | 0              | 0.000002                | 2.643118  | -0.000033 |
| 13               | 6                | 0              | 1.292789                | 0.967879  | 0.032042  |
| 14               | 6                | 0              | 2.392923                | 1.815137  | -0.291434 |

|    |   |   |           |           |           |
|----|---|---|-----------|-----------|-----------|
| 15 | 6 | 0 | 1.559605  | -0.384891 | 0.399175  |
| 16 | 6 | 0 | 3.687404  | 1.318938  | -0.327364 |
| 17 | 1 | 0 | 2.209021  | 2.856200  | -0.542306 |
| 18 | 6 | 0 | 2.855034  | -0.866041 | 0.388125  |
| 19 | 1 | 0 | 0.759710  | -1.024529 | 0.752690  |
| 20 | 6 | 0 | 3.915304  | -0.021204 | 0.008436  |
| 21 | 1 | 0 | 4.516303  | 1.962622  | -0.599853 |
| 22 | 1 | 0 | 3.060434  | -1.888988 | 0.687620  |
| 23 | 6 | 0 | 5.324065  | -0.595011 | 0.006806  |
| 24 | 6 | 0 | -5.324076 | -0.594999 | -0.006836 |
| 25 | 9 | 0 | -5.387579 | -1.670665 | 0.805799  |
| 26 | 9 | 0 | -5.665166 | -0.996163 | -1.249495 |
| 27 | 9 | 0 | -6.234113 | 0.301003  | 0.410294  |
| 28 | 9 | 0 | 6.234205  | 0.301168  | -0.409677 |
| 29 | 9 | 0 | 5.387621  | -1.670234 | -0.806421 |
| 30 | 9 | 0 | 5.664913  | -0.996862 | 1.249320  |

### 1bH.log

SCF Done: E(RB3LYP) = -1176.75526665 A.U. after 1 cycles

Zero-point correction= 0.218675  
(Hartree/Particle)  
Thermal correction to Energy= 0.236432  
Thermal correction to Enthalpy= 0.237376  
Thermal correction to Gibbs Free Energy= 0.164759  
Sum of electronic and zero-point Energies= -1176.536592  
Sum of electronic and thermal Energies= -1176.518835  
Sum of electronic and thermal Enthalpies= -1176.517891  
Sum of electronic and thermal Free Energies= -1176.590508

|       | E (Thermal) | CV             | S              |
|-------|-------------|----------------|----------------|
|       | KCal/Mol    | Cal/Mol-Kelvin | Cal/Mol-Kelvin |
| Total | 148.363     | 66.747         | 152.836        |

| Center<br>Number | Atomic<br>Number | Atomic<br>Type | Coordinates (Angstroms) |           |           |
|------------------|------------------|----------------|-------------------------|-----------|-----------|
|                  |                  |                | X                       | Y         | Z         |
| 1                | 6                | 0              | -2.720697               | -0.229601 | -1.047569 |
| 2                | 6                | 0              | -1.537747               | 0.503432  | -1.023396 |
| 3                | 6                | 0              | -1.281335               | 1.428029  | 0.002430  |
| 4                | 6                | 0              | -2.243498               | 1.592679  | 1.005478  |
| 5                | 6                | 0              | -3.433954               | 0.860527  | 0.992648  |
| 6                | 6                | 0              | -3.674272               | -0.051161 | -0.036363 |
| 7                | 1                | 0              | -2.906050               | -0.936655 | -1.850782 |

|    |   |   |           |           |           |
|----|---|---|-----------|-----------|-----------|
| 8  | 1 | 0 | -0.802131 | 0.354204  | -1.809983 |
| 9  | 1 | 0 | -2.067773 | 2.305617  | 1.807778  |
| 10 | 1 | 0 | -4.168959 | 1.004065  | 1.777837  |
| 11 | 6 | 0 | 0.001070  | 2.245208  | 0.009051  |
| 12 | 1 | 0 | 0.008247  | 2.912526  | -0.862555 |
| 13 | 1 | 0 | -0.000946 | 2.897635  | 0.891814  |
| 14 | 6 | 0 | 1.276595  | 1.417779  | 0.001926  |
| 15 | 6 | 0 | 2.228457  | 1.572203  | -1.012561 |
| 16 | 6 | 0 | 1.534411  | 0.489109  | 1.023655  |
| 17 | 6 | 0 | 3.410764  | 0.826947  | -1.014046 |
| 18 | 1 | 0 | 2.049609  | 2.285106  | -1.814205 |
| 19 | 6 | 0 | 2.708788  | -0.258025 | 1.032888  |
| 20 | 1 | 0 | 0.804661  | 0.344780  | 1.816637  |
| 21 | 6 | 0 | 3.651153  | -0.091137 | 0.009343  |
| 22 | 1 | 0 | 4.135563  | 0.958815  | -1.810722 |
| 23 | 1 | 0 | 2.892149  | -0.973195 | 1.829297  |
| 24 | 6 | 0 | 4.933755  | -0.876507 | 0.054397  |
| 25 | 6 | 0 | -4.929898 | -0.879958 | -0.055810 |
| 26 | 9 | 0 | -4.695972 | -2.164949 | 0.331094  |
| 27 | 9 | 0 | -5.473865 | -0.951850 | -1.298802 |
| 28 | 9 | 0 | -5.888223 | -0.394572 | 0.770012  |
| 29 | 9 | 0 | 5.582720  | -0.883525 | -1.135162 |
| 30 | 9 | 0 | 4.726455  | -2.172836 | 0.403305  |
| 31 | 9 | 0 | 5.806005  | -0.371162 | 0.970935  |

-----

### 1b+\_tropylium\_1.log

SCF Done: E(RB3LYP) = -1175.85011399 A.U. after 1 cycles

Zero-point correction= 0.208746  
(Hartree/Particle)  
Thermal correction to Energy= 0.226099  
Thermal correction to Enthalpy= 0.227043  
Thermal correction to Gibbs Free Energy= 0.159315  
Sum of electronic and zero-point Energies= -1175.641368  
Sum of electronic and thermal Energies= -1175.624015  
Sum of electronic and thermal Enthalpies= -1175.623071  
Sum of electronic and thermal Free Energies= -1175.690799

|       | E (Thermal) | CV             | S              |
|-------|-------------|----------------|----------------|
|       | KCal/Mol    | Cal/Mol-Kelvin | Cal/Mol-Kelvin |
| Total | 141.879     | 65.697         | 142.547        |

-----

| Center Number | Atomic Number | Atomic Type | Coordinates (Angstroms) |   |   |
|---------------|---------------|-------------|-------------------------|---|---|
|               |               |             | X                       | Y | Z |

|    |   |   |           |           |           |
|----|---|---|-----------|-----------|-----------|
| 1  | 6 | 0 | -2.674260 | -0.896162 | 0.172307  |
| 2  | 6 | 0 | -3.693606 | 0.061111  | -0.008479 |
| 3  | 6 | 0 | -3.537472 | 1.414472  | -0.268455 |
| 4  | 6 | 0 | -1.294091 | -0.746477 | 0.144298  |
| 5  | 6 | 0 | -2.333282 | 2.130878  | -0.409377 |
| 6  | 6 | 0 | -0.493825 | 0.401087  | -0.085037 |
| 7  | 6 | 0 | -1.016591 | 1.696119  | -0.335469 |
| 8  | 1 | 0 | -3.017825 | -1.907121 | 0.379929  |
| 9  | 1 | 0 | -4.447611 | 1.996289  | -0.381096 |
| 10 | 1 | 0 | -0.743028 | -1.657779 | 0.358056  |
| 11 | 1 | 0 | -2.456780 | 3.189930  | -0.624606 |
| 12 | 1 | 0 | -0.274475 | 2.466482  | -0.524941 |
| 13 | 6 | 0 | 0.971825  | 0.238119  | -0.061555 |
| 14 | 6 | 0 | 1.800130  | 1.248363  | 0.473507  |
| 15 | 6 | 0 | 1.574358  | -0.930428 | -0.575303 |
| 16 | 6 | 0 | 3.180926  | 1.088230  | 0.507271  |
| 17 | 1 | 0 | 1.367601  | 2.142324  | 0.912948  |
| 18 | 6 | 0 | 2.957228  | -1.077675 | -0.565582 |
| 19 | 1 | 0 | 0.970200  | -1.706895 | -1.035164 |
| 20 | 6 | 0 | 3.761118  | -0.071562 | -0.018679 |
| 21 | 1 | 0 | 3.805569  | 1.862243  | 0.940779  |
| 22 | 1 | 0 | 3.410363  | -1.966620 | -0.991518 |
| 23 | 6 | 0 | 5.264441  | -0.258053 | 0.049833  |
| 24 | 6 | 0 | -5.117888 | -0.497186 | 0.108767  |
| 25 | 9 | 0 | -6.052952 | 0.445424  | -0.078394 |
| 26 | 9 | 0 | -5.297623 | -1.037254 | 1.330613  |
| 27 | 9 | 0 | -5.304822 | -1.468372 | -0.807263 |
| 28 | 9 | 0 | 5.616567  | -0.840638 | 1.219852  |
| 29 | 9 | 0 | 5.913578  | 0.922091  | -0.027782 |
| 30 | 9 | 0 | 5.713244  | -1.046124 | -0.948435 |

### 1b+\_tropylium\_2.log

SCF Done: E(RB3LYP) = -1175.85016099 A.U. after 12 cycles

Zero-point correction= 0.208745  
(Hartree/Particle)  
Thermal correction to Energy= 0.226102  
Thermal correction to Enthalpy= 0.227047  
Thermal correction to Gibbs Free Energy= 0.159053  
Sum of electronic and zero-point Energies= -1175.641416  
Sum of electronic and thermal Energies= -1175.624059  
Sum of electronic and thermal Enthalpies= -1175.623114  
Sum of electronic and thermal Free Energies= -1175.691108

E (Thermal)

CV

S

|       |          |                |                |
|-------|----------|----------------|----------------|
| Total | KCal/Mol | Cal/Mol-Kelvin | Cal/Mol-Kelvin |
|       | 141.881  | 65.691         | 143.104        |

| Center<br>Number | Atomic<br>Number | Atomic<br>Type | Coordinates (Angstroms) |           |           |
|------------------|------------------|----------------|-------------------------|-----------|-----------|
|                  |                  |                | X                       | Y         | Z         |
| 1                | 6                | 0              | 2.322244                | 2.124131  | 0.421046  |
| 2                | 6                | 0              | 3.530789                | 1.414261  | 0.284424  |
| 3                | 6                | 0              | 3.695258                | 0.063990  | 0.013612  |
| 4                | 6                | 0              | 1.008249                | 1.684283  | 0.331082  |
| 5                | 6                | 0              | 2.681844                | -0.895966 | -0.185092 |
| 6                | 6                | 0              | 0.493476                | 0.389295  | 0.064391  |
| 7                | 6                | 0              | 1.300803                | -0.752622 | -0.168273 |
| 8                | 1                | 0              | 2.439071                | 3.181680  | 0.647112  |
| 9                | 1                | 0              | 0.260908                | 2.449547  | 0.520901  |
| 10               | 1                | 0              | 3.031728                | -1.903504 | -0.398783 |
| 11               | 1                | 0              | 0.755774                | -1.664327 | -0.395321 |
| 12               | 6                | 0              | -0.971279               | 0.220720  | 0.028025  |
| 13               | 6                | 0              | -1.573060               | -0.954891 | 0.526228  |
| 14               | 6                | 0              | -1.799244               | 1.231537  | -0.506482 |
| 15               | 6                | 0              | -2.955168               | -1.107621 | 0.504115  |
| 16               | 1                | 0              | -0.969090               | -1.734590 | 0.980831  |
| 17               | 6                | 0              | -3.179050               | 1.066030  | -0.552978 |
| 18               | 1                | 0              | -1.366377               | 2.128836  | -0.938801 |
| 19               | 6                | 0              | -3.758643               | -0.100723 | -0.041922 |
| 20               | 1                | 0              | -3.407349               | -2.006528 | 0.909743  |
| 21               | 1                | 0              | -3.802481               | 1.836384  | -0.994633 |
| 22               | 6                | 0              | -5.267558               | -0.251059 | -0.035675 |
| 23               | 9                | 0              | -5.791853               | 0.280824  | 1.093362  |
| 24               | 9                | 0              | -5.637830               | -1.547034 | -0.084824 |
| 25               | 9                | 0              | -5.832519               | 0.383137  | -1.083794 |
| 26               | 1                | 0              | 4.437299                | 1.998962  | 0.410654  |
| 27               | 6                | 0              | 5.123033                | -0.486970 | -0.095573 |
| 28               | 9                | 0              | 6.052142                | 0.458359  | 0.106866  |
| 29               | 9                | 0              | 5.306486                | -1.464291 | 0.814607  |
| 30               | 9                | 0              | 5.315836                | -1.016864 | -1.319914 |

### 1b\_carbene\_s.log

SCF Done: E(RB3LYP) = -1175.43294089 A.U. after 1 cycles

Zero-point correction= 0.193382  
(Hartree/Particle)  
Thermal correction to Energy= 0.210864  
Thermal correction to Enthalpy= 0.211808



Thermal correction to Gibbs Free Energy= 0.141659  
 Sum of electronic and zero-point Energies= -1175.239559  
 Sum of electronic and thermal Energies= -1175.222077  
 Sum of electronic and thermal Enthalpies= -1175.221133  
 Sum of electronic and thermal Free Energies= -1175.291282

|       | E (Thermal)<br>KCal/Mol | CV<br>Cal/Mol-Kelvin | S<br>Cal/Mol-Kelvin |
|-------|-------------------------|----------------------|---------------------|
| Total | 132.319                 | 65.815               | 147.640             |

| Center<br>Number | Atomic<br>Number | Atomic<br>Type | Coordinates (Angstroms) |           |           |
|------------------|------------------|----------------|-------------------------|-----------|-----------|
|                  |                  |                | X                       | Y         | Z         |
| 1                | 6                | 0              | -2.707460               | -0.620436 | -0.738437 |
| 2                | 6                | 0              | -1.451356               | -0.022940 | -0.700800 |
| 3                | 6                | 0              | -1.239276               | 1.191847  | 0.009136  |
| 4                | 6                | 0              | -2.350313               | 1.766943  | 0.685437  |
| 5                | 6                | 0              | -3.580888               | 1.127857  | 0.713983  |
| 6                | 6                | 0              | -3.765086               | -0.060406 | -0.012201 |
| 7                | 1                | 0              | -2.861441               | -1.533095 | -1.305063 |
| 8                | 1                | 0              | -0.629226               | -0.467277 | -1.253504 |
| 9                | 1                | 0              | -2.206507               | 2.715812  | 1.193156  |
| 10               | 1                | 0              | -4.410360               | 1.560676  | 1.264862  |
| 11               | 6                | 0              | -0.000001               | 1.909286  | -0.000003 |
| 12               | 6                | 0              | 1.239277                | 1.191849  | -0.009121 |
| 13               | 6                | 0              | 2.350304                | 1.766942  | -0.685443 |
| 14               | 6                | 0              | 1.451367                | -0.022928 | 0.700826  |
| 15               | 6                | 0              | 3.580879                | 1.127856  | -0.714005 |
| 16               | 1                | 0              | 2.206486                | 2.715808  | -1.193164 |
| 17               | 6                | 0              | 2.707471                | -0.620423 | 0.738447  |
| 18               | 1                | 0              | 0.629246                | -0.467259 | 1.253549  |
| 19               | 6                | 0              | 3.765085                | -0.060402 | 0.012185  |
| 20               | 1                | 0              | 4.410343                | 1.560668  | -1.264900 |
| 21               | 1                | 0              | 2.861463                | -1.533075 | 1.305082  |
| 22               | 6                | 0              | 5.133956                | -0.690895 | 0.048665  |
| 23               | 6                | 0              | -5.133957               | -0.690895 | -0.048670 |
| 24               | 9                | 0              | -5.732547               | -0.669334 | 1.168737  |
| 25               | 9                | 0              | -5.099787               | -1.982009 | -0.454746 |
| 26               | 9                | 0              | -5.966475               | -0.032644 | -0.899765 |
| 27               | 9                | 0              | 5.732648                | -0.669143 | -1.168691 |
| 28               | 9                | 0              | 5.099753                | -1.982070 | 0.454535  |
| 29               | 9                | 0              | 5.966406                | -0.032777 | 0.899930  |

**b\_carbene\_t.log**

SCF Done: E(UB3LYP) = -1175.44405578 A.U. after 12 cycles

Zero-point correction= 0.192626  
 (Hartree/Particle)  
 Thermal correction to Energy= 0.210288  
 Thermal correction to Enthalpy= 0.211232  
 Thermal correction to Gibbs Free Energy= 0.139738  
 Sum of electronic and zero-point Energies= -1175.251430  
 Sum of electronic and thermal Energies= -1175.233768  
 Sum of electronic and thermal Enthalpies= -1175.232824  
 Sum of electronic and thermal Free Energies= -1175.304317

|       | E (Thermal) | CV             | S              |
|-------|-------------|----------------|----------------|
|       | KCal/Mol    | Cal/Mol-Kelvin | Cal/Mol-Kelvin |
| Total | 131.958     | 66.215         | 150.471        |

| Center<br>Number | Atomic<br>Number | Atomic<br>Type | Coordinates (Angstroms) |           |           |
|------------------|------------------|----------------|-------------------------|-----------|-----------|
|                  |                  |                | X                       | Y         | Z         |
| 1                | 6                | 0              | -3.682715               | 1.214770  | -0.559908 |
| 2                | 6                | 0              | -2.360158               | 1.629797  | -0.582932 |
| 3                | 6                | 0              | -1.330926               | 0.833078  | -0.001382 |
| 4                | 6                | 0              | -1.713393               | -0.395078 | 0.620912  |
| 5                | 6                | 0              | -3.038884               | -0.801886 | 0.635494  |
| 6                | 6                | 0              | -4.031694               | -0.001926 | 0.047786  |
| 7                | 1                | 0              | -4.451385               | 1.835054  | -1.009991 |
| 8                | 1                | 0              | -2.092759               | 2.572910  | -1.049695 |
| 9                | 1                | 0              | -0.953406               | -1.008134 | 1.095866  |
| 10               | 1                | 0              | -3.310522               | -1.737795 | 1.113952  |
| 11               | 6                | 0              | 0.000989                | 1.267797  | 0.000144  |
| 12               | 6                | 0              | 1.329661                | 0.823602  | 0.018614  |
| 13               | 6                | 0              | 1.702460                | -0.431713 | -0.553303 |
| 14               | 6                | 0              | 2.364469                | 1.633184  | 0.571704  |
| 15               | 6                | 0              | 3.024277                | -0.850375 | -0.548308 |
| 16               | 1                | 0              | 0.937421                | -1.058505 | -1.001474 |
| 17               | 6                | 0              | 3.683417                | 1.206033  | 0.568397  |
| 18               | 1                | 0              | 2.103724                | 2.594052  | 1.004813  |
| 19               | 6                | 0              | 4.022175                | -0.038824 | 0.014493  |
| 20               | 1                | 0              | 3.287519                | -1.810399 | -0.981642 |
| 21               | 1                | 0              | 4.455449                | 1.833252  | 1.002800  |
| 22               | 6                | 0              | 5.459910                | -0.475536 | -0.034108 |
| 23               | 6                | 0              | -5.458597               | -0.474447 | 0.020790  |
| 24               | 9                | 0              | -5.725067               | -1.221171 | -1.088298 |
| 25               | 9                | 0              | -6.341877               | 0.554643  | 0.010476  |
| 26               | 9                | 0              | -5.763412               | -1.253521 | 1.088526  |
| 27               | 9                | 0              | 5.589133                | -1.825153 | 0.015060  |
| 28               | 9                | 0              | 6.187699                | 0.033993  | 0.990632  |
| 29               | 9                | 0              | 6.075525                | -0.072268 | -1.181395 |

1c+\_a.log

SCF Done: E(RB3LYP) = -799.465906986 A.U. after 1 cycles

Zero-point correction= 0.174378  
 (Hartree/Particle)  
 Thermal correction to Energy= 0.186918  
 Thermal correction to Enthalpy= 0.187862  
 Thermal correction to Gibbs Free Energy= 0.134212  
 Sum of electronic and zero-point Energies= -799.291529  
 Sum of electronic and thermal Energies= -799.278989  
 Sum of electronic and thermal Enthalpies= -799.278045  
 Sum of electronic and thermal Free Energies= -799.331695

|       | E (Thermal) | CV             | S              |
|-------|-------------|----------------|----------------|
|       | KCal/Mol    | Cal/Mol-Kelvin | Cal/Mol-Kelvin |
| Total | 117.293     | 49.197         | 112.917        |

| Center<br>Number | Atomic<br>Number | Atomic<br>Type | Coordinates (Angstroms) |           |           |
|------------------|------------------|----------------|-------------------------|-----------|-----------|
|                  |                  |                | X                       | Y         | Z         |
| 1                | 6                | 0              | -3.934365               | -0.414011 | 0.183749  |
| 2                | 6                | 0              | -2.701114               | -1.026417 | 0.275280  |
| 3                | 6                | 0              | -1.532301               | -0.291947 | -0.090448 |
| 4                | 6                | 0              | -1.679260               | 1.028542  | -0.614103 |
| 5                | 6                | 0              | -2.938106               | 1.598727  | -0.717786 |
| 6                | 6                | 0              | -4.076447               | 0.889257  | -0.304632 |
| 7                | 1                | 0              | -2.631440               | -2.042525 | 0.651482  |
| 8                | 1                | 0              | -0.818197               | 1.562204  | -0.997194 |
| 9                | 6                | 0              | -0.291666               | -0.959093 | 0.055429  |
| 10               | 1                | 0              | -0.369886               | -2.039253 | 0.179005  |
| 11               | 6                | 0              | 1.042796                | -0.463997 | 0.068484  |
| 12               | 6                | 0              | 1.381689                | 0.896847  | 0.308850  |
| 13               | 6                | 0              | 2.077707                | -1.420174 | -0.140146 |
| 14               | 6                | 0              | 2.715796                | 1.258170  | 0.291808  |
| 15               | 1                | 0              | 0.639272                | 1.637873  | 0.575613  |
| 16               | 6                | 0              | 3.393082                | -0.990192 | -0.174054 |
| 17               | 1                | 0              | 1.852009                | -2.469369 | -0.301136 |
| 18               | 6                | 0              | 3.743860                | 0.343082  | 0.041806  |
| 19               | 1                | 0              | -5.069704               | 1.322585  | -0.377680 |
| 20               | 9                | 0              | 3.048452                | 2.530806  | 0.539482  |
| 21               | 9                | 0              | 4.366433                | -1.878923 | -0.399420 |
| 22               | 1                | 0              | 4.783126                | 0.656678  | 0.040811  |
| 23               | 9                | 0              | -5.030712               | -1.086861 | 0.555404  |
| 24               | 1                | 0              | -3.052758               | 2.593845  | -1.135505 |

1c+\_b.log

SCF Done: E(RB3LYP) = -799.466496297 A.U. after 1 cyc

Zero-point correction= 0.174424  
 (Hartree/Particle)  
 Thermal correction to Energy= 0.186956  
 Thermal correction to Enthalpy= 0.187900  
 Thermal correction to Gibbs Free Energy= 0.134243  
 Sum of electronic and zero-point Energies= -799.292073  
 Sum of electronic and thermal Energies= -799.279541  
 Sum of electronic and thermal Enthalpies= -799.278596  
 Sum of electronic and thermal Free Energies= -799.332253

|       | E (Thermal) | CV             | S              |
|-------|-------------|----------------|----------------|
|       | KCal/Mol    | Cal/Mol-Kelvin | Cal/Mol-Kelvin |
| Total | 117.316     | 49.178         | 112.930        |

| Center<br>Number | Atomic<br>Number | Forces (Hartrees/Bohr) |              |              |
|------------------|------------------|------------------------|--------------|--------------|
|                  |                  | X                      | Y            | Z            |
| 1                | 6                | -0.000007316           | 0.000001638  | 0.000000369  |
| 2                | 6                | -0.000005447           | -0.000004204 | -0.000006512 |
| 3                | 6                | -0.000003099           | -0.000029785 | -0.000011839 |
| 4                | 6                | 0.000007471            | 0.000021240  | 0.000011532  |
| 5                | 6                | -0.000008397           | 0.000006515  | -0.000002423 |
| 6                | 6                | -0.000010181           | -0.000021779 | -0.000004357 |
| 7                | 1                | 0.000001667            | 0.000004343  | 0.000000526  |
| 8                | 1                | 0.000002601            | -0.000001546 | 0.000002184  |
| 9                | 6                | -0.000009936           | -0.000000466 | -0.000000237 |
| 10               | 1                | 0.000002860            | 0.000001784  | 0.000002940  |
| 11               | 6                | 0.000004156            | 0.000006336  | -0.000009864 |
| 12               | 6                | -0.000003570           | 0.000024608  | -0.000004821 |
| 13               | 6                | 0.000008111            | -0.000036427 | 0.000014839  |
| 14               | 6                | -0.000006868           | -0.000000212 | -0.000002223 |
| 15               | 1                | 0.000000568            | -0.000004216 | 0.000001499  |
| 16               | 6                | 0.000017660            | -0.000012912 | 0.000009994  |
| 17               | 1                | -0.000001174           | 0.000007234  | -0.000001645 |
| 18               | 6                | -0.000016550           | 0.000010892  | -0.000005639 |
| 19               | 9                | 0.000012261            | -0.000008109 | 0.000003498  |
| 20               | 9                | -0.000004096           | 0.000021878  | -0.000009350 |
| 21               | 1                | -0.000006513           | -0.000008419 | 0.000002674  |
| 22               | 1                | 0.000012377            | -0.000002725 | -0.000000820 |
| 23               | 9                | 0.000000888            | 0.000014069  | 0.000005762  |
| 24               | 1                | 0.000012528            | 0.000010263  | 0.000003913  |

1cH.log

SCF Done: E(RB3LYP) = -800.359702022 A.U. after 1 cycles

Zero-point correction= 0.185097  
 (Hartree/Particle)  
 Thermal correction to Energy= 0.197965  
 Thermal correction to Enthalpy= 0.198909  
 Thermal correction to Gibbs Free Energy= 0.142506  
 Sum of electronic and zero-point Energies= -800.174605  
 Sum of electronic and thermal Energies= -800.161737  
 Sum of electronic and thermal Enthalpies= -800.160793  
 Sum of electronic and thermal Free Energies= -800.217196

|       | E (Thermal) | CV             | S              |
|-------|-------------|----------------|----------------|
|       | KCal/Mol    | Cal/Mol-Kelvin | Cal/Mol-Kelvin |
| Total | 124.225     | 50.183         | 118.711        |

| Center<br>Number | Atomic<br>Number | Atomic<br>Type | Coordinates (Angstroms) |           |           |
|------------------|------------------|----------------|-------------------------|-----------|-----------|
|                  |                  |                | X                       | Y         | Z         |
| 1                | 6                | 0              | 3.093331                | 0.662942  | 0.832598  |
| 2                | 6                | 0              | 1.894847                | 0.893771  | 0.173407  |
| 3                | 6                | 0              | 1.553106                | 0.088891  | -0.924450 |
| 4                | 6                | 0              | 2.434837                | -0.925584 | -1.319768 |
| 5                | 6                | 0              | 3.637013                | -1.137156 | -0.635303 |
| 6                | 6                | 0              | 3.981680                | -0.339158 | 0.456521  |
| 7                | 1                | 0              | 1.239908                | 1.688407  | 0.519494  |
| 8                | 1                | 0              | 2.183833                | -1.553105 | -2.171574 |
| 9                | 6                | 0              | 0.251130                | 0.329361  | -1.671101 |
| 10               | 1                | 0              | 0.238680                | 1.353777  | -2.063405 |
| 11               | 1                | 0              | 0.218689                | -0.333305 | -2.545613 |
| 12               | 6                | 0              | -1.005164               | 0.111823  | -0.839712 |
| 13               | 6                | 0              | -1.986338               | 1.109083  | -0.768821 |
| 14               | 6                | 0              | -1.205173               | -1.098311 | -0.157371 |
| 15               | 6                | 0              | -3.138948               | 0.874537  | -0.025553 |
| 16               | 1                | 0              | -1.868442               | 2.058109  | -1.282624 |
| 17               | 6                | 0              | -2.374949               | -1.277323 | 0.567242  |
| 18               | 1                | 0              | -0.462939               | -1.889944 | -0.178433 |
| 19               | 6                | 0              | -3.371227               | -0.310192 | 0.659268  |
| 20               | 1                | 0              | 4.906911                | -0.479587 | 1.005959  |
| 21               | 9                | 0              | -4.081430               | 1.849530  | 0.035951  |
| 22               | 9                | 0              | -2.563151               | -2.451466 | 1.221883  |
| 23               | 1                | 0              | -4.275054               | -0.472314 | 1.234888  |
| 24               | 9                | 0              | 3.413889                | 1.453081  | 1.892661  |
| 25               | 1                | 0              | 4.309757                | -1.928454 | -0.954887 |

1c+\_a\_tropylium\_1.log

SCF Done: E(RB3LYP) = -799.467479338 A.U. after 1 cycles

Zero-point correction= 0.175090  
 (Hartree/Particle)  
 Thermal correction to Energy= 0.187506  
 Thermal correction to Enthalpy= 0.188450  
 Thermal correction to Gibbs Free Energy= 0.135442  
 Sum of electronic and zero-point Energies= -799.292389  
 Sum of electronic and thermal Energies= -799.279973  
 Sum of electronic and thermal Enthalpies= -799.279029  
 Sum of electronic and thermal Free Energies= -799.332037

|       | E (Thermal) | CV             | S              |
|-------|-------------|----------------|----------------|
|       | KCal/Mol    | Cal/Mol-Kelvin | Cal/Mol-Kelvin |
| Total | 117.662     | 48.848         | 111.566        |

| Center<br>Number | Atomic<br>Number | Atomic<br>Type | Coordinates (Angstroms) |           |           |
|------------------|------------------|----------------|-------------------------|-----------|-----------|
|                  |                  |                | X                       | Y         | Z         |
| 1                | 6                | 0              | -2.337759               | 1.291121  | -0.304676 |
| 2                | 6                | 0              | -3.372371               | 0.361615  | -0.156867 |
| 3                | 6                | 0              | -3.200960               | -0.976330 | 0.138459  |
| 4                | 6                | 0              | -0.951628               | 1.166177  | -0.216790 |
| 5                | 6                | 0              | -2.017285               | -1.714338 | 0.357524  |
| 6                | 6                | 0              | -0.177869               | 0.032168  | 0.076780  |
| 7                | 6                | 0              | -0.713498               | -1.269171 | 0.332682  |
| 8                | 1                | 0              | -0.420771               | 2.088157  | -0.435369 |
| 9                | 1                | 0              | -2.182591               | -2.764064 | 0.588637  |
| 10               | 1                | 0              | 0.024349                | -2.028713 | 0.572553  |
| 11               | 6                | 0              | 1.288267                | 0.191149  | 0.129653  |
| 12               | 6                | 0              | 2.132274                | -0.844332 | -0.324646 |
| 13               | 6                | 0              | 1.864752                | 1.376120  | 0.635934  |
| 14               | 6                | 0              | 3.505654                | -0.659929 | -0.276237 |
| 15               | 1                | 0              | 1.748748                | -1.759388 | -0.764137 |
| 16               | 6                | 0              | 3.250193                | 1.517194  | 0.693182  |
| 17               | 1                | 0              | 1.237040                | 2.166496  | 1.035845  |
| 18               | 6                | 0              | 4.088509                | 0.500595  | 0.228639  |
| 19               | 1                | 0              | 3.682916                | 2.422505  | 1.107264  |
| 20               | 1                | 0              | -4.388314               | 0.724454  | -0.289731 |
| 21               | 1                | 0              | 5.169540                | 0.593345  | 0.253094  |
| 22               | 9                | 0              | 4.299894                | -1.640518 | -0.740920 |
| 23               | 9                | 0              | -4.320996               | -1.690046 | 0.239666  |
| 24               | 9                | 0              | -2.758964               | 2.522229  | -0.604299 |

-----  
**1c+\_b\_tropylium\_1.log**

SCF Done: E(RB3LYP) = -799.467441925 A.U. after 1 cycles

Zero-point correction= 0.175098  
(Hartree/Particle)  
Thermal correction to Energy= 0.187512  
Thermal correction to Enthalpy= 0.188456  
Thermal correction to Gibbs Free Energy= 0.135452  
Sum of electronic and zero-point Energies= -799.292344  
Sum of electronic and thermal Energies= -799.279930  
Sum of electronic and thermal Enthalpies= -799.278986  
Sum of electronic and thermal Free Energies= -799.331990

|       | E (Thermal) | CV             | S              |
|-------|-------------|----------------|----------------|
|       | KCal/Mol    | Cal/Mol-Kelvin | Cal/Mol-Kelvin |
| Total | 117.666     | 48.843         | 111.556        |

-----

| Center<br>Number | Atomic<br>Number | Atomic<br>Type | Coordinates (Angstroms) |           |           |
|------------------|------------------|----------------|-------------------------|-----------|-----------|
|                  |                  |                | X                       | Y         | Z         |
| 1                | 6                | 0              | -2.092344               | 1.410975  | -0.290195 |
| 2                | 6                | 0              | -3.273923               | 0.695577  | -0.069977 |
| 3                | 6                | 0              | -3.342611               | -0.652692 | 0.219811  |
| 4                | 6                | 0              | -0.752969               | 1.022543  | -0.291308 |
| 5                | 6                | 0              | -2.310301               | -1.605212 | 0.364110  |
| 6                | 6                | 0              | -0.192875               | -0.240987 | -0.044471 |
| 7                | 6                | 0              | -0.949819               | -1.417717 | 0.252103  |
| 8                | 1                | 0              | -0.071071               | 1.828712  | -0.546177 |
| 9                | 1                | 0              | -2.658195               | -2.605462 | 0.611273  |
| 10               | 1                | 0              | -0.356772               | -2.305678 | 0.448123  |
| 11               | 6                | 0              | 1.276714                | -0.368124 | -0.087971 |
| 12               | 6                | 0              | 1.884255                | -1.537208 | -0.595293 |
| 13               | 6                | 0              | 2.093108                | 0.689176  | 0.366096  |
| 14               | 6                | 0              | 3.273159                | -1.638292 | -0.659759 |
| 15               | 1                | 0              | 1.279823                | -2.346818 | -0.992499 |
| 16               | 6                | 0              | 3.470740                | 0.544306  | 0.311139  |
| 17               | 1                | 0              | 1.683224                | 1.591621  | 0.807906  |
| 18               | 6                | 0              | 4.084117                | -0.598967 | -0.197885 |
| 19               | 1                | 0              | -4.208034               | 1.247309  | -0.136776 |
| 20               | 1                | 0              | 5.167224                | -0.662384 | -0.224172 |
| 21               | 9                | 0              | -4.569414               | -1.139928 | 0.398286  |
| 22               | 9                | 0              | -2.288662               | 2.701914  | -0.567892 |
| 23               | 9                | 0              | 4.239266                | 1.545081  | 0.775082  |

24 1 0 3.729572 -2.531174 -1.075375

1c+\_a\_tropylium\_2.log

SCF Done: E(RB3LYP) = -799.466680405 A.U. after 1 cycles

Zero-point correction= 0.175195  
(Hartree/Particle)  
Thermal correction to Energy= 0.187647  
Thermal correction to Enthalpy= 0.188591  
Thermal correction to Gibbs Free Energy= 0.135484  
Sum of electronic and zero-point Energies= -799.291486  
Sum of electronic and thermal Energies= -799.279033  
Sum of electronic and thermal Enthalpies= -799.278089  
Sum of electronic and thermal Free Energies= -799.331197

|       | E (Thermal)<br>KCal/Mol | CV<br>Cal/Mol-Kelvin | S<br>Cal/Mol-Kelvin |
|-------|-------------------------|----------------------|---------------------|
| Total | 117.750                 | 48.948               | 111.775             |

| Center<br>Number | Atomic<br>Number | Atomic<br>Type | Coordinates (Angstroms) |           |           |
|------------------|------------------|----------------|-------------------------|-----------|-----------|
|                  |                  |                | X                       | Y         | Z         |
| 1                | 6                | 0              | 2.556430                | -1.648455 | -0.733656 |
| 2                | 6                | 0              | 3.716393                | -0.941901 | -0.405505 |
| 3                | 6                | 0              | 3.774891                | 0.323835  | 0.164631  |
| 4                | 6                | 0              | 1.212603                | -1.293792 | -0.589378 |
| 5                | 6                | 0              | 2.733455                | 1.186006  | 0.547117  |
| 6                | 6                | 0              | 0.631137                | -0.124623 | -0.056665 |
| 7                | 6                | 0              | 1.368346                | 0.980420  | 0.451909  |
| 8                | 1                | 0              | 0.510207                | -2.030168 | -0.969302 |
| 9                | 1                | 0              | 0.766325                | 1.790365  | 0.853707  |
| 10               | 6                | 0              | -0.845712               | -0.035938 | -0.020136 |
| 11               | 6                | 0              | -1.489007               | 1.190414  | -0.280488 |
| 12               | 6                | 0              | -1.615624               | -1.179124 | 0.272260  |
| 13               | 6                | 0              | -2.877458               | 1.237190  | -0.255600 |
| 14               | 1                | 0              | -0.944668               | 2.087563  | -0.554955 |
| 15               | 6                | 0              | -2.999798               | -1.063980 | 0.306348  |
| 16               | 1                | 0              | -1.166745               | -2.133364 | 0.525724  |
| 17               | 6                | 0              | -3.665415               | 0.129119  | 0.041006  |
| 18               | 1                | 0              | -4.747848               | 0.192692  | 0.065333  |
| 19               | 1                | 0              | 2.727912                | -2.622869 | -1.185225 |
| 20               | 1                | 0              | 3.064355                | 2.124685  | 0.985823  |
| 21               | 1                | 0              | 4.675291                | -1.410190 | -0.613372 |
| 22               | 9                | 0              | -3.725594               | -2.150719 | 0.613346  |



|    |   |   |           |          |           |
|----|---|---|-----------|----------|-----------|
| 23 | 9 | 0 | -3.484052 | 2.402158 | -0.533021 |
| 24 | 9 | 0 | 5.000060  | 0.798146 | 0.390919  |

---

**1c+\_b\_tropylium\_2.log**

SCF Done: E(RB3LYP) = -799.466932000 A.U. after 1 cycles

Zero-point correction= 0.175156  
(Hartree/Particle)  
Thermal correction to Energy= 0.187621  
Thermal correction to Enthalpy= 0.188565  
Thermal correction to Gibbs Free Energy= 0.135481  
Sum of electronic and zero-point Energies= -799.291776  
Sum of electronic and thermal Energies= -799.279311  
Sum of electronic and thermal Enthalpies= -799.278367  
Sum of electronic and thermal Free Energies= -799.331451

|       | E (Thermal) | CV             | S              |
|-------|-------------|----------------|----------------|
|       | KCal/Mol    | Cal/Mol-Kelvin | Cal/Mol-Kelvin |
| Total | 117.734     | 48.962         | 111.726        |

---

| Center<br>Number | Atomic<br>Number | Atomic<br>Type | Coordinates (Angstroms) |           |           |
|------------------|------------------|----------------|-------------------------|-----------|-----------|
|                  |                  |                | X                       | Y         | Z         |
| 1                | 6                | 0              | 2.917023                | 0.957944  | 0.365934  |
| 2                | 6                | 0              | 3.947940                | 0.055819  | 0.052962  |
| 3                | 6                | 0              | 3.792970                | -1.237928 | -0.409194 |
| 4                | 6                | 0              | 1.532865                | 0.830604  | 0.318274  |
| 5                | 6                | 0              | 2.593022                | -1.935365 | -0.667204 |
| 6                | 6                | 0              | 0.754553                | -0.269639 | -0.086628 |
| 7                | 6                | 0              | 1.279106                | -1.515098 | -0.531339 |
| 8                | 1                | 0              | 1.002260                | 1.710697  | 0.671001  |
| 9                | 1                | 0              | 0.533364                | -2.243561 | -0.836097 |
| 10               | 6                | 0              | -0.717077               | -0.116656 | -0.049012 |
| 11               | 6                | 0              | -1.531210               | -1.201161 | 0.333559  |
| 12               | 6                | 0              | -1.309796               | 1.114359  | -0.393111 |
| 13               | 6                | 0              | -2.908451               | -1.022158 | 0.375186  |
| 14               | 1                | 0              | -1.121990               | -2.154162 | 0.650630  |
| 15               | 6                | 0              | -2.694323               | 1.224326  | -0.356303 |
| 16               | 1                | 0              | -0.729999               | 1.963525  | -0.738400 |
| 17               | 6                | 0              | -3.525140               | 0.176641  | 0.030001  |
| 18               | 1                | 0              | -4.603477               | 0.289096  | 0.059657  |
| 19               | 1                | 0              | 2.719614                | -2.948724 | -1.041135 |
| 20               | 1                | 0              | 4.955492                | 0.436794  | 0.200554  |
| 21               | 9                | 0              | -3.254051               | 2.390739  | -0.713035 |

|    |   |   |           |           |           |
|----|---|---|-----------|-----------|-----------|
| 22 | 9 | 0 | -3.676128 | -2.050626 | 0.768515  |
| 23 | 1 | 0 | 4.711162  | -1.787305 | -0.601911 |
| 24 | 9 | 0 | 3.346255  | 2.144721  | 0.804183  |

---

### 1c\_carbene\_s.log

SCF Done: E(RB3LYP) = -799.038173565 A.U. after 1 cycles

Zero-point correction= 0.159779  
(Hartree/Particle)  
Thermal correction to Energy= 0.172381  
Thermal correction to Enthalpy= 0.173326  
Thermal correction to Gibbs Free Energy= 0.119439  
Sum of electronic and zero-point Energies= -798.878395  
Sum of electronic and thermal Energies= -798.865792  
Sum of electronic and thermal Enthalpies= -798.864848  
Sum of electronic and thermal Free Energies= -798.918735

|       | E (Thermal) | CV             | S              |
|-------|-------------|----------------|----------------|
|       | KCal/Mol    | Cal/Mol-Kelvin | Cal/Mol-Kelvin |
| Total | 108.171     | 49.228         | 113.414        |

---

| Center<br>Number | Atomic<br>Number | Atomic<br>Type | Coordinates (Angstroms) |           |           |
|------------------|------------------|----------------|-------------------------|-----------|-----------|
|                  |                  |                | X                       | Y         | Z         |
| 1                | 6                | 0              | -3.066520               | 0.693809  | -0.714638 |
| 2                | 6                | 0              | -1.773196               | 0.217749  | -0.600213 |
| 3                | 6                | 0              | -1.519015               | -0.898698 | 0.247895  |
| 4                | 6                | 0              | -2.612695               | -1.469310 | 0.955107  |
| 5                | 6                | 0              | -3.885076               | -0.913408 | 0.875021  |
| 6                | 6                | 0              | -4.129321               | 0.167163  | 0.017077  |
| 7                | 1                | 0              | -0.978021               | 0.672748  | -1.181042 |
| 8                | 1                | 0              | -2.419970               | -2.344541 | 1.567320  |
| 9                | 6                | 0              | -0.237513               | -1.526930 | 0.377367  |
| 10               | 6                | 0              | 0.956641                | -0.744690 | 0.227424  |
| 11               | 6                | 0              | 1.090058                | 0.576791  | 0.738725  |
| 12               | 6                | 0              | 2.086041                | -1.360721 | -0.375558 |
| 13               | 6                | 0              | 2.318416                | 1.211091  | 0.648840  |
| 14               | 1                | 0              | 0.261680                | 1.074988  | 1.229692  |
| 15               | 6                | 0              | 3.256637                | -0.637601 | -0.509552 |
| 16               | 1                | 0              | 2.021790                | -2.384542 | -0.726475 |
| 17               | 6                | 0              | 3.419807                | 0.646086  | 0.012161  |
| 18               | 1                | 0              | -5.123243               | 0.586613  | -0.104772 |
| 19               | 9                | 0              | 2.455720                | 2.455279  | 1.172773  |
| 20               | 9                | 0              | 4.320786                | -1.210048 | -1.124703 |

|    |   |   |           |           |           |
|----|---|---|-----------|-----------|-----------|
| 21 | 1 | 0 | 4.365837  | 1.170766  | -0.058242 |
| 22 | 9 | 0 | -3.315098 | 1.732084  | -1.555664 |
| 23 | 1 | 0 | -4.706324 | -1.339876 | 1.443934  |

---

### 1c\_carbene\_t.log

SCF Done: E(UB3LYP) = -799.047350544 A.U. after 1 cycles

Zero-point correction= 0.158994  
(Hartree/Particle)  
Thermal correction to Energy= 0.171768  
Thermal correction to Enthalpy= 0.172712  
Thermal correction to Gibbs Free Energy= 0.116836  
Sum of electronic and zero-point Energies= -798.888357  
Sum of electronic and thermal Energies= -798.875583  
Sum of electronic and thermal Enthalpies= -798.874638  
Sum of electronic and thermal Free Energies= -798.930515

|       | E (Thermal) | CV             | S              |
|-------|-------------|----------------|----------------|
|       | KCal/Mol    | Cal/Mol-Kelvin | Cal/Mol-Kelvin |
| Total | 107.786     | 49.670         | 117.602        |

---

| Center<br>Number | Atomic<br>Number | Atomic<br>Type | Coordinates (Angstroms) |           |           |
|------------------|------------------|----------------|-------------------------|-----------|-----------|
|                  |                  |                | X                       | Y         | Z         |
| 1                | 6                | 0              | -3.423718               | 0.693195  | 0.523622  |
| 2                | 6                | 0              | -2.072089               | 0.406562  | 0.529962  |
| 3                | 6                | 0              | -1.606161               | -0.744599 | -0.174232 |
| 4                | 6                | 0              | -2.566618               | -1.561718 | -0.838706 |
| 5                | 6                | 0              | -3.916695               | -1.234050 | -0.812640 |
| 6                | 6                | 0              | -4.369036               | -0.095746 | -0.130612 |
| 7                | 1                | 0              | -1.385256               | 1.046865  | 1.073127  |
| 8                | 1                | 0              | -2.224047               | -2.444344 | -1.369754 |
| 9                | 6                | 0              | -0.245712               | -1.090968 | -0.176175 |
| 10               | 6                | 0              | 1.045050                | -0.545845 | -0.104067 |
| 11               | 6                | 0              | 1.305388                | 0.789843  | -0.538293 |
| 12               | 6                | 0              | 2.134773                | -1.333832 | 0.367257  |
| 13               | 6                | 0              | 2.597680                | 1.275426  | -0.470348 |
| 14               | 1                | 0              | 0.510704                | 1.416591  | -0.926957 |
| 15               | 6                | 0              | 3.399948                | -0.779124 | 0.400020  |
| 16               | 1                | 0              | 1.976571                | -2.353335 | 0.700269  |
| 17               | 6                | 0              | 3.678700                | 0.525441  | -0.007605 |
| 18               | 1                | 0              | -5.418418               | 0.177754  | -0.098149 |
| 19               | 9                | 0              | 2.838123                | 2.546270  | -0.880958 |
| 20               | 9                | 0              | 4.431194                | -1.534192 | 0.855061  |

|    |   |   |           |           |           |
|----|---|---|-----------|-----------|-----------|
| 21 | 1 | 0 | 4.681828  | 0.933364  | 0.029853  |
| 22 | 9 | 0 | -3.855570 | 1.794751  | 1.193838  |
| 23 | 1 | 0 | -4.634161 | -1.865860 | -1.328953 |

---

**1d+.log**

SCF Done: E(RB3LYP) = -700.233717288 A.U. after 2 cycles

Zero-point correction= 0.182871  
(Hartree/Particle)  
Thermal correction to Energy= 0.194540  
Thermal correction to Enthalpy= 0.195484  
Thermal correction to Gibbs Free Energy= 0.143902  
Sum of electronic and zero-point Energies= -700.050847  
Sum of electronic and thermal Energies= -700.039177  
Sum of electronic and thermal Enthalpies= -700.038233  
Sum of electronic and thermal Free Energies= -700.089815

|       | E (Thermal) | CV             | S              |
|-------|-------------|----------------|----------------|
|       | KCal/Mol    | Cal/Mol-Kelvin | Cal/Mol-Kelvin |
| Total | 122.076     | 46.185         | 108.563        |

---

| Center<br>Number | Atomic<br>Number | Atomic<br>Type | Coordinates (Angstroms) |           |           |
|------------------|------------------|----------------|-------------------------|-----------|-----------|
|                  |                  |                | X                       | Y         | Z         |
| 1                | 6                | 0              | 3.674507                | 1.188208  | 0.449661  |
| 2                | 6                | 0              | 2.378938                | 1.679450  | 0.363064  |
| 3                | 6                | 0              | 1.294927                | 0.818496  | 0.014123  |
| 4                | 6                | 0              | 1.570726                | -0.539778 | -0.316379 |
| 5                | 6                | 0              | 2.873807                | -0.984741 | -0.244583 |
| 6                | 6                | 0              | 3.933161                | -0.152359 | 0.143632  |
| 7                | 1                | 0              | 2.177476                | 2.722491  | 0.589187  |
| 8                | 1                | 0              | 0.805888                | -1.211886 | -0.684465 |
| 9                | 6                | 0              | 0.000000                | 1.398962  | 0.000003  |
| 10               | 6                | 0              | -1.294927               | 0.818496  | -0.014120 |
| 11               | 6                | 0              | -1.570726               | -0.539778 | 0.316380  |
| 12               | 6                | 0              | -2.378937               | 1.679450  | -0.363064 |
| 13               | 6                | 0              | -2.873807               | -0.984741 | 0.244582  |
| 14               | 1                | 0              | -0.805889               | -1.211886 | 0.684467  |
| 15               | 6                | 0              | -3.674506               | 1.188209  | -0.449663 |
| 16               | 1                | 0              | -2.177474               | 2.722491  | -0.589188 |
| 17               | 6                | 0              | -3.933161               | -0.152358 | -0.143634 |
| 18               | 1                | 0              | 0.000000                | 2.488831  | -0.000000 |
| 19               | 1                | 0              | 4.939904                | -0.558414 | 0.176276  |
| 20               | 1                | 0              | -4.939904               | -0.558413 | -0.176279 |

|    |   |   |           |           |           |
|----|---|---|-----------|-----------|-----------|
| 21 | 1 | 0 | 4.490987  | 1.842579  | 0.737159  |
| 22 | 9 | 0 | 3.148178  | -2.254637 | -0.575606 |
| 23 | 1 | 0 | -4.490986 | 1.842579  | -0.737162 |
| 24 | 9 | 0 | -3.148180 | -2.254636 | 0.575606  |

---

### 1dH.log

SCF Done: E(RB3LYP) = -701.118682771 A.U. after 1 cycles

Zero-point correction= 0.193391  
(Hartree/Particle)  
Thermal correction to Energy= 0.205411  
Thermal correction to Enthalpy= 0.206355  
Thermal correction to Gibbs Free Energy= 0.151982  
Sum of electronic and zero-point Energies= -700.925292  
Sum of electronic and thermal Energies= -700.913271  
Sum of electronic and thermal Enthalpies= -700.912327  
Sum of electronic and thermal Free Energies= -700.966701

|       | E (Thermal) | CV             | S              |
|-------|-------------|----------------|----------------|
|       | KCal/Mol    | Cal/Mol-Kelvin | Cal/Mol-Kelvin |
| Total | 128.898     | 47.176         | 114.439        |

---

| Center<br>Number | Atomic<br>Number | Atomic<br>Type | Coordinates (Angstroms) |           |           |
|------------------|------------------|----------------|-------------------------|-----------|-----------|
|                  |                  |                | X                       | Y         | Z         |
| 1                | 6                | 0              | 2.799104                | 1.105371  | 0.191673  |
| 2                | 6                | 0              | 1.568891                | 0.722101  | -0.322107 |
| 3                | 6                | 0              | 1.343874                | -0.631047 | -0.619142 |
| 4                | 6                | 0              | 2.371285                | -1.553986 | -0.381725 |
| 5                | 6                | 0              | 3.602247                | -1.139548 | 0.138624  |
| 6                | 6                | 0              | 3.831578                | 0.205433  | 0.433237  |
| 7                | 6                | 0              | 0.015726                | -1.077524 | -1.212895 |
| 8                | 1                | 0              | -0.083887               | -0.663722 | -2.224879 |
| 9                | 1                | 0              | 0.034708                | -2.168430 | -1.330686 |
| 10               | 6                | 0              | -1.206459               | -0.682629 | -0.399038 |
| 11               | 6                | 0              | -2.187844               | 0.150245  | -0.950534 |
| 12               | 6                | 0              | -1.378205               | -1.153908 | 0.912612  |
| 13               | 6                | 0              | -3.302077               | 0.485562  | -0.188010 |
| 14               | 6                | 0              | -2.506664               | -0.802727 | 1.654578  |
| 15               | 6                | 0              | -3.490464               | 0.029214  | 1.108356  |
| 16               | 9                | 0              | 3.003885                | 2.421399  | 0.472550  |
| 17               | 9                | 0              | -4.244723               | 1.295892  | -0.742759 |
| 18               | 1                | 0              | -4.376401               | 0.317924  | 1.664667  |
| 19               | 1                | 0              | -2.626009               | -1.176438 | 2.668072  |

|    |   |   |           |           |           |
|----|---|---|-----------|-----------|-----------|
| 20 | 1 | 0 | -0.619715 | -1.794731 | 1.355294  |
| 21 | 1 | 0 | -2.100084 | 0.536292  | -1.962235 |
| 22 | 1 | 0 | 0.799386  | 1.472406  | -0.479153 |
| 23 | 1 | 0 | 4.775248  | 0.556085  | 0.838500  |
| 24 | 1 | 0 | 4.387785  | -1.869087 | 0.316909  |
| 25 | 1 | 0 | 2.210556  | -2.605257 | -0.608391 |

-----

**1dH\_tropylium\_1.log**

SCF Done: E(RB3LYP) = -700.231557667 A.U. after 2 cycles

Zero-point correction= 0.183556  
(Hartree/Particle)  
Thermal correction to Energy= 0.195152  
Thermal correction to Enthalpy= 0.196096  
Thermal correction to Gibbs Free Energy= 0.145120  
Sum of electronic and zero-point Energies= -700.048002  
Sum of electronic and thermal Energies= -700.036405  
Sum of electronic and thermal Enthalpies= -700.035461  
Sum of electronic and thermal Free Energies= -700.086438

|       | E (Thermal) | CV             | S              |
|-------|-------------|----------------|----------------|
|       | KCal/Mol    | Cal/Mol-Kelvin | Cal/Mol-Kelvin |
| Total | 122.460     | 45.986         | 107.289        |

-----

| Center<br>Number | Atomic<br>Number | Atomic<br>Type | Coordinates (Angstroms) |           |           |
|------------------|------------------|----------------|-------------------------|-----------|-----------|
|                  |                  |                | X                       | Y         | Z         |
| 1                | 6                | 0              | -2.537696               | 1.121856  | 0.242971  |
| 2                | 6                | 0              | -1.177641               | 0.838321  | 0.260658  |
| 3                | 6                | 0              | -1.169648               | -1.591930 | -0.357589 |
| 4                | 6                | 0              | -2.518012               | -1.874081 | -0.504247 |
| 5                | 6                | 0              | -3.638104               | -1.025839 | -0.359392 |
| 6                | 6                | 0              | -3.657044               | 0.314602  | -0.025474 |
| 7                | 1                | 0              | -0.561320               | 1.684277  | 0.551821  |
| 8                | 1                | 0              | -2.749405               | -2.898063 | -0.788270 |
| 9                | 6                | 0              | -0.515805               | -0.375448 | -0.010405 |
| 10               | 6                | 0              | 0.958837                | -0.384638 | 0.068019  |
| 11               | 6                | 0              | 1.646212                | -1.512705 | 0.565111  |
| 12               | 6                | 0              | 1.697909                | 0.743657  | -0.344865 |
| 13               | 6                | 0              | 3.037207                | -1.505666 | 0.658122  |
| 14               | 1                | 0              | 1.098597                | -2.375526 | 0.931286  |
| 15               | 6                | 0              | 3.081461                | 0.706357  | -0.262743 |
| 16               | 1                | 0              | 1.226794                | 1.621341  | -0.775538 |
| 17               | 6                | 0              | 3.772862                | -0.395838 | 0.235812  |

-----

|    |   |   |           |           |           |
|----|---|---|-----------|-----------|-----------|
| 18 | 1 | 0 | -0.504498 | -2.424454 | -0.566885 |
| 19 | 1 | 0 | -4.617718 | 0.818374  | 0.046587  |
| 20 | 1 | 0 | 4.856766  | -0.374149 | 0.285607  |
| 21 | 9 | 0 | 3.777667  | 1.775304  | -0.688864 |
| 22 | 1 | 0 | 3.554220  | -2.368780 | 1.065646  |
| 23 | 9 | 0 | -2.842079 | 2.385928  | 0.554517  |
| 24 | 1 | 0 | -4.606953 | -1.485991 | -0.536995 |

-----

**1dH\_tropylium\_2.log**

SCF Done: E(RB3LYP) = -700.231630453 A.U. after 1 cycles

Zero-point correction= 0.183567  
(Hartree/Particle)  
Thermal correction to Energy= 0.195159  
Thermal correction to Enthalpy= 0.196103  
Thermal correction to Gibbs Free Energy= 0.145154  
Sum of electronic and zero-point Energies= -700.048064  
Sum of electronic and thermal Energies= -700.036472  
Sum of electronic and thermal Enthalpies= -700.035528  
Sum of electronic and thermal Free Energies= -700.086476

|       | E (Thermal) | CV             | S              |
|-------|-------------|----------------|----------------|
|       | KCal/Mol    | Cal/Mol-Kelvin | Cal/Mol-Kelvin |
| Total | 122.464     | 45.979         | 107.230        |

-----

| Center<br>Number | Atomic<br>Number | Atomic<br>Type | Coordinates (Angstroms) |           |           |
|------------------|------------------|----------------|-------------------------|-----------|-----------|
|                  |                  |                | X                       | Y         | Z         |
| 1                | 6                | 0              | 2.772262                | -0.874357 | 0.279840  |
| 2                | 6                | 0              | 1.384986                | -0.892862 | 0.206203  |
| 3                | 6                | 0              | 0.889660                | 1.488679  | -0.402012 |
| 4                | 6                | 0              | 2.150818                | 2.059754  | -0.453239 |
| 5                | 6                | 0              | 3.416540                | 1.472437  | -0.234054 |
| 6                | 6                | 0              | 3.704410                | 0.161621  | 0.094132  |
| 7                | 1                | 0              | 0.949373                | -1.856961 | 0.452590  |
| 8                | 1                | 0              | 2.171787                | 3.114963  | -0.715630 |
| 9                | 6                | 0              | 0.494347                | 0.153016  | -0.106073 |
| 10               | 6                | 0              | -0.948183               | -0.161954 | -0.131468 |
| 11               | 6                | 0              | -1.890871               | 0.790091  | 0.310136  |
| 12               | 6                | 0              | -1.402966               | -1.412162 | -0.602857 |
| 13               | 6                | 0              | -3.238003               | 0.463039  | 0.281966  |
| 14               | 1                | 0              | -1.599586               | 1.750346  | 0.723033  |
| 15               | 6                | 0              | -2.766789               | -1.697749 | -0.640780 |
| 16               | 1                | 0              | -0.700163               | -2.143175 | -0.990772 |

-----

|    |   |   |           |           |           |
|----|---|---|-----------|-----------|-----------|
| 17 | 6 | 0 | -3.701921 | -0.763100 | -0.189549 |
| 18 | 1 | 0 | 0.075114  | 2.161538  | -0.653255 |
| 19 | 1 | 0 | 4.744642  | -0.123004 | 0.231338  |
| 20 | 1 | 0 | -4.767550 | -0.968395 | -0.198380 |
| 21 | 9 | 0 | 3.323187  | -2.048835 | 0.604563  |
| 22 | 1 | 0 | 4.271489  | 2.135462  | -0.340785 |
| 23 | 1 | 0 | -3.106681 | -2.652977 | -1.028535 |
| 24 | 9 | 0 | -4.125872 | 1.367001  | 0.733985  |

### 1d\_carbene\_s.log

SCF Done: E(RB3LYP) = -699.798303207 A.U. after 1 cycles

Zero-point correction= 0.168151  
(Hartree/Particle)  
Thermal correction to Energy= 0.179878  
Thermal correction to Enthalpy= 0.180822  
Thermal correction to Gibbs Free Energy= 0.129095  
Sum of electronic and zero-point Energies= -699.630152  
Sum of electronic and thermal Energies= -699.618425  
Sum of electronic and thermal Enthalpies= -699.617481  
Sum of electronic and thermal Free Energies= -699.669208

|       | E (Thermal) | CV             | S              |
|-------|-------------|----------------|----------------|
|       | KCal/Mol    | Cal/Mol-Kelvin | Cal/Mol-Kelvin |
| Total | 112.875     | 46.203         | 108.869        |

| Center<br>Number | Atomic<br>Number | Atomic<br>Type | Coordinates (Angstroms) |           |           |
|------------------|------------------|----------------|-------------------------|-----------|-----------|
|                  |                  |                | X                       | Y         | Z         |
| 1                | 6                | 0              | 2.929283                | 0.879279  | -0.414615 |
| 2                | 6                | 0              | 1.607368                | 0.471658  | -0.435763 |
| 3                | 6                | 0              | 1.284277                | -0.853197 | -0.024556 |
| 4                | 6                | 0              | 2.342782                | -1.698653 | 0.406836  |
| 5                | 6                | 0              | 3.647920                | -1.225723 | 0.491178  |
| 6                | 6                | 0              | 3.960008                | 0.070008  | 0.057156  |
| 7                | 6                | 0              | -0.037077               | -1.407318 | -0.096284 |
| 8                | 6                | 0              | -1.172175               | -0.559561 | 0.129636  |
| 9                | 6                | 0              | -2.376814               | -0.866574 | -0.560318 |
| 10               | 6                | 0              | -1.191867               | 0.506078  | 1.074525  |
| 11               | 6                | 0              | -3.494495               | -0.082265 | -0.351498 |
| 12               | 6                | 0              | -2.362351               | 1.221450  | 1.317354  |
| 13               | 6                | 0              | -3.524301               | 0.950016  | 0.586499  |
| 14               | 1                | 0              | -2.405458               | -1.705431 | -1.247543 |
| 15               | 1                | 0              | -4.441762               | 1.509274  | 0.741111  |



|    |   |   |           |           |           |
|----|---|---|-----------|-----------|-----------|
| 16 | 1 | 0 | -0.293060 | 0.729852  | 1.640228  |
| 17 | 1 | 0 | 0.840708  | 1.147702  | -0.799049 |
| 18 | 1 | 0 | 4.978896  | 0.444678  | 0.060029  |
| 19 | 1 | 0 | 2.098731  | -2.720872 | 0.678275  |
| 20 | 9 | 0 | 3.238655  | 2.131392  | -0.848065 |
| 21 | 9 | 0 | -4.630021 | -0.350886 | -1.048458 |
| 22 | 1 | 0 | 4.442052  | -1.873306 | 0.852184  |
| 23 | 1 | 0 | -2.373158 | 2.012362  | 2.062577  |

-----

**1d\_carbene\_t.log**

SCF Done: E(UB3LYP) = -699.807177757 A.U. after 1 cycles

Zero-point correction= 0.167290  
(Hartree/Particle)  
Thermal correction to Energy= 0.179212  
Thermal correction to Enthalpy= 0.180156  
Thermal correction to Gibbs Free Energy= 0.126384  
Sum of electronic and zero-point Energies= -699.639888  
Sum of electronic and thermal Energies= -699.627966  
Sum of electronic and thermal Enthalpies= -699.627022  
Sum of electronic and thermal Free Energies= -699.680794

|       | E (Thermal) | CV             | S              |
|-------|-------------|----------------|----------------|
|       | KCal/Mol    | Cal/Mol-Kelvin | Cal/Mol-Kelvin |
| Total | 112.457     | 46.674         | 113.173        |

-----

| Center<br>Number | Atomic<br>Number | Atomic<br>Type | Coordinates (Angstroms) |           |           |
|------------------|------------------|----------------|-------------------------|-----------|-----------|
|                  |                  |                | X                       | Y         | Z         |
| 1                | 6                | 0              | 3.244112                | 0.754641  | -0.379626 |
| 2                | 6                | 0              | 1.876144                | 0.562052  | -0.384158 |
| 3                | 6                | 0              | 1.349798                | -0.680073 | 0.084932  |
| 4                | 6                | 0              | 2.271073                | -1.677599 | 0.520135  |
| 5                | 6                | 0              | 3.639570                | -1.438271 | 0.500720  |
| 6                | 6                | 0              | 4.151313                | -0.212421 | 0.051566  |
| 7                | 6                | 0              | -0.030697               | -0.931224 | 0.077519  |
| 8                | 6                | 0              | -1.280683               | -0.297701 | 0.155875  |
| 9                | 6                | 0              | -2.430314               | -0.889104 | -0.442947 |
| 10               | 6                | 0              | -1.449990               | 0.928429  | 0.870581  |
| 11               | 6                | 0              | -3.651919               | -0.255643 | -0.324193 |
| 12               | 6                | 0              | -2.699648               | 1.530241  | 0.957821  |
| 13               | 6                | 0              | -3.825714               | 0.946842  | 0.360199  |
| 14               | 1                | 0              | -2.350690               | -1.822713 | -0.989467 |
| 15               | 1                | 0              | -4.809991               | 1.399030  | 0.421185  |

|    |   |   |           |           |           |
|----|---|---|-----------|-----------|-----------|
| 16 | 1 | 0 | -0.589920 | 1.381567  | 1.353622  |
| 17 | 1 | 0 | 1.219883  | 1.344439  | -0.750093 |
| 18 | 1 | 0 | 5.216026  | -0.005302 | 0.028915  |
| 19 | 1 | 0 | 1.883267  | -2.629008 | 0.870732  |
| 20 | 9 | 0 | 3.732746  | 1.944462  | -0.824296 |
| 21 | 9 | 0 | -4.739777 | -0.829347 | -0.905490 |
| 22 | 1 | 0 | 4.325671  | -2.209406 | 0.840262  |
| 23 | 1 | 0 | -2.809241 | 2.464345  | 1.502368  |

1e+.log

SCF Done: E(RB3LYP) = -997.910904594 A.U. after 1 cycles

Zero-point correction= 0.158379  
(Hartree/Particle)  
Thermal correction to Energy= 0.172910  
Thermal correction to Enthalpy= 0.173855  
Thermal correction to Gibbs Free Energy= 0.115848  
Sum of electronic and zero-point Energies= -997.752526  
Sum of electronic and thermal Energies= -997.737994  
Sum of electronic and thermal Enthalpies= -997.737050  
Sum of electronic and thermal Free Energies= -997.795056

|       | E (Thermal) | CV             | S              |
|-------|-------------|----------------|----------------|
|       | KCal/Mol    | Cal/Mol-Kelvin | Cal/Mol-Kelvin |
| Total | 108.503     | 55.139         | 122.084        |

| Center<br>Number | Atomic<br>Number | Atomic<br>Type | Coordinates (Angstroms) |           |           |
|------------------|------------------|----------------|-------------------------|-----------|-----------|
|                  |                  |                | X                       | Y         | Z         |
| 1                | 6                | 0              | 2.686946                | 0.973159  | 0.126815  |
| 2                | 6                | 0              | 1.357415                | 1.348099  | 0.049516  |
| 3                | 6                | 0              | 0.290936                | 0.403277  | -0.080735 |
| 4                | 6                | 0              | 0.683516                | -0.962682 | -0.184199 |
| 5                | 6                | 0              | 2.010405                | -1.352353 | -0.131823 |
| 6                | 6                | 0              | 3.014674                | -0.386119 | 0.035520  |
| 7                | 6                | 0              | -1.025207               | 0.937003  | -0.193378 |
| 8                | 6                | 0              | -2.321614               | 0.403002  | -0.042873 |
| 9                | 6                | 0              | -2.649188               | -0.848049 | 0.569829  |
| 10               | 6                | 0              | -3.394610               | 1.246936  | -0.486036 |
| 11               | 6                | 0              | -3.970142               | -1.233448 | 0.694158  |
| 12               | 1                | 0              | -1.871029               | -1.481287 | 0.973019  |
| 13               | 6                | 0              | -4.710281               | 0.834686  | -0.385009 |
| 14               | 1                | 0              | -3.160217               | 2.213734  | -0.923372 |
| 15               | 6                | 0              | -4.998948               | -0.406575 | 0.204432  |

|    |   |   |           |           |           |
|----|---|---|-----------|-----------|-----------|
| 16 | 1 | 0 | -4.216770 | -2.174414 | 1.175638  |
| 17 | 1 | 0 | -1.018206 | 1.997819  | -0.436616 |
| 18 | 9 | 0 | 3.645082  | 1.876895  | 0.281230  |
| 19 | 9 | 0 | 2.345153  | -2.630360 | -0.256909 |
| 20 | 1 | 0 | -5.513632 | 1.470119  | -0.743626 |
| 21 | 1 | 0 | -6.032837 | -0.727276 | 0.299874  |
| 22 | 9 | 0 | 1.066404  | 2.644222  | 0.136077  |
| 23 | 9 | 0 | -0.222359 | -1.911924 | -0.413469 |
| 24 | 9 | 0 | 4.273417  | -0.761090 | 0.097269  |

## 1eH.log

SCF Done: E(RB3LYP) = -998.808428594 A.U. after 1 cycles

Zero-point correction= 0.169183  
 (Hartree/Particle)  
 Thermal correction to Energy= 0.184013  
 Thermal correction to Enthalpy= 0.184957  
 Thermal correction to Gibbs Free Energy= 0.124906  
 Sum of electronic and zero-point Energies= -998.639246  
 Sum of electronic and thermal Energies= -998.624415  
 Sum of electronic and thermal Enthalpies= -998.623471  
 Sum of electronic and thermal Free Energies= -998.683523

|       | E (Thermal) | CV             | S              |
|-------|-------------|----------------|----------------|
|       | KCal/Mol    | Cal/Mol-Kelvin | Cal/Mol-Kelvin |
| Total | 115.470     | 56.084         | 126.389        |

| Center<br>Number | Atomic<br>Number | Atomic<br>Type | Coordinates (Angstroms) |           |           |
|------------------|------------------|----------------|-------------------------|-----------|-----------|
|                  |                  |                | X                       | Y         | Z         |
| 1                | 6                | 0              | 2.164067                | 1.203823  | 0.153967  |
| 2                | 6                | 0              | 0.929691                | 1.185244  | -0.490508 |
| 3                | 6                | 0              | 0.274716                | -0.000037 | -0.832523 |
| 4                | 6                | 0              | 0.929921                | -1.185202 | -0.490654 |
| 5                | 6                | 0              | 2.164322                | -1.203622 | 0.153834  |
| 6                | 6                | 0              | 2.784249                | 0.000132  | 0.480368  |
| 7                | 6                | 0              | -1.076659               | -0.000109 | -1.527340 |
| 8                | 1                | 0              | -1.133155               | 0.880311  | -2.174536 |
| 9                | 1                | 0              | -1.133098               | -0.880616 | -2.174420 |
| 10               | 6                | 0              | -2.253161               | -0.000098 | -0.557790 |
| 11               | 6                | 0              | -2.802243               | 1.206509  | -0.101473 |
| 12               | 6                | 0              | -2.801558               | -1.206737 | -0.100699 |
| 13               | 6                | 0              | -3.873245               | 1.207663  | 0.795969  |
| 14               | 1                | 0              | -2.390407               | 2.150513  | -0.450584 |

|    |   |   |           |           |           |
|----|---|---|-----------|-----------|-----------|
| 15 | 6 | 0 | -3.872556 | -1.207928 | 0.796739  |
| 16 | 1 | 0 | -2.389195 | -2.150730 | -0.449215 |
| 17 | 6 | 0 | -4.410948 | -0.000138 | 1.249069  |
| 18 | 1 | 0 | -4.288839 | 2.152453  | 1.137260  |
| 19 | 1 | 0 | -4.287610 | -2.152736 | 1.138636  |
| 20 | 1 | 0 | -5.245645 | -0.000152 | 1.945272  |
| 21 | 9 | 0 | 0.364045  | -2.372328 | -0.796450 |
| 22 | 9 | 0 | 2.758265  | -2.366797 | 0.459391  |
| 23 | 9 | 0 | 3.970574  | 0.000252  | 1.101794  |
| 24 | 9 | 0 | 2.757827  | 2.367050  | 0.459677  |
| 25 | 9 | 0 | 0.363552  | 2.372264  | -0.796209 |

-----

### 1e\_tropylium\_1.log

SCF Done: E(RB3LYP) = -997.905275593 A.U. after 2 cycles

Zero-point correction= 0.158606  
(Hartree/Particle)  
Thermal correction to Energy= 0.172774  
Thermal correction to Enthalpy= 0.173718  
Thermal correction to Gibbs Free Energy= 0.116906  
Sum of electronic and zero-point Energies= -997.746669  
Sum of electronic and thermal Energies= -997.732502  
Sum of electronic and thermal Enthalpies= -997.731558  
Sum of electronic and thermal Free Energies= -997.788369

|       | E (Thermal) | CV             | S              |
|-------|-------------|----------------|----------------|
|       | KCal/Mol    | Cal/Mol-Kelvin | Cal/Mol-Kelvin |
| Total | 108.417     | 54.486         | 119.571        |

-----

| Center<br>Number | Atomic<br>Number | Atomic<br>Type | Coordinates (Angstroms) |           |           |
|------------------|------------------|----------------|-------------------------|-----------|-----------|
|                  |                  |                | X                       | Y         | Z         |
| 1                | 6                | 0              | -1.516102               | -1.424064 | -0.122593 |
| 2                | 6                | 0              | -0.148260               | -1.141243 | -0.110961 |
| 3                | 6                | 0              | -0.128333               | 1.338601  | 0.105094  |
| 4                | 6                | 0              | -1.473719               | 1.664417  | 0.127736  |
| 5                | 6                | 0              | -2.612329               | 0.833433  | 0.086134  |
| 6                | 6                | 0              | -2.620903               | -0.551781 | -0.023530 |
| 7                | 6                | 0              | 0.536733                | 0.097459  | 0.008146  |
| 8                | 6                | 0              | 2.010285                | 0.117084  | 0.007740  |
| 9                | 6                | 0              | 2.686088                | 1.133931  | -0.706066 |
| 10               | 6                | 0              | 2.766697                | -0.826911 | 0.738995  |
| 11               | 6                | 0              | 4.075171                | 1.194345  | -0.698761 |
| 12               | 1                | 0              | 2.127903                | 1.845100  | -1.309139 |

|    |   |   |           |           |           |
|----|---|---|-----------|-----------|-----------|
| 13 | 6 | 0 | 4.154646  | -0.736936 | 0.766873  |
| 14 | 1 | 0 | 2.275627  | -1.602002 | 1.316659  |
| 15 | 6 | 0 | 4.812460  | 0.264696  | 0.044148  |
| 16 | 1 | 0 | 0.513001  | 2.208824  | 0.213661  |
| 17 | 1 | 0 | 5.897075  | 0.319501  | 0.057351  |
| 18 | 9 | 0 | -1.841180 | -2.696861 | -0.266741 |
| 19 | 1 | 0 | 4.725128  | -1.450912 | 1.352947  |
| 20 | 1 | 0 | 4.583634  | 1.961499  | -1.274651 |
| 21 | 9 | 0 | -1.759663 | 2.956758  | 0.239340  |
| 22 | 9 | 0 | -3.787013 | 1.427584  | 0.160457  |
| 23 | 9 | 0 | -3.805394 | -1.130945 | -0.050914 |
| 24 | 9 | 0 | 0.595810  | -2.229891 | -0.270425 |

-----

### 1e\_tropylium\_2.log

SCF Done: E(RB3LYP) = -997.908996514 A.U. after 2 cycles

Zero-point correction= 0.158894  
(Hartree/Particle)  
Thermal correction to Energy= 0.173439  
Thermal correction to Enthalpy= 0.174383  
Thermal correction to Gibbs Free Energy= 0.117004  
Sum of electronic and zero-point Energies= -997.750102  
Sum of electronic and thermal Energies= -997.735558  
Sum of electronic and thermal Enthalpies= -997.734614  
Sum of electronic and thermal Free Energies= -997.791993

|       | E (Thermal) | CV             | S              |
|-------|-------------|----------------|----------------|
|       | KCal/Mol    | Cal/Mol-Kelvin | Cal/Mol-Kelvin |
| Total | 108.834     | 55.218         | 120.764        |

-----

| Center<br>Number | Atomic<br>Number | Atomic<br>Type | Coordinates (Angstroms) |           |           |
|------------------|------------------|----------------|-------------------------|-----------|-----------|
|                  |                  |                | X                       | Y         | Z         |
| 1                | 6                | 0              | 3.400167                | 1.249543  | -0.927676 |
| 2                | 6                | 0              | 2.038685                | 1.002812  | -0.753950 |
| 3                | 6                | 0              | 2.038624                | -1.001660 | 0.754917  |
| 4                | 6                | 0              | 3.400032                | -1.249051 | 0.927941  |
| 5                | 6                | 0              | 4.508313                | -0.560444 | 0.413707  |
| 6                | 6                | 0              | 4.508385                | 0.559727  | -0.414955 |
| 7                | 6                | 0              | 1.387348                | 0.000526  | 0.000351  |
| 8                | 6                | 0              | -0.095412               | 0.000336  | 0.000210  |
| 9                | 6                | 0              | -0.836613               | -1.183675 | -0.177686 |
| 10               | 6                | 0              | -0.837270               | 1.183945  | 0.177936  |
| 11               | 6                | 0              | -2.226465               | -1.195252 | -0.189380 |

|    |   |   |           |           |           |
|----|---|---|-----------|-----------|-----------|
| 12 | 6 | 0 | -2.227144 | 1.194822  | 0.189128  |
| 13 | 6 | 0 | -2.925859 | -0.000382 | -0.000274 |
| 14 | 1 | 0 | 1.385234  | -1.678743 | 1.296162  |
| 15 | 1 | 0 | 3.633392  | -2.095738 | 1.569607  |
| 16 | 1 | 0 | 5.483063  | -0.946987 | 0.701884  |
| 17 | 1 | 0 | 5.483196  | 0.945334  | -0.704158 |
| 18 | 1 | 0 | 3.633615  | 2.096471  | -1.568991 |
| 19 | 1 | 0 | 1.385445  | 1.680467  | -1.294529 |
| 20 | 9 | 0 | -0.196488 | -2.345211 | -0.391260 |
| 21 | 9 | 0 | -2.888591 | -2.331508 | -0.387577 |
| 22 | 9 | 0 | -4.249477 | -0.000735 | -0.000487 |
| 23 | 9 | 0 | -2.889890 | 2.330742  | 0.387187  |
| 24 | 9 | 0 | -0.197853 | 2.345792  | 0.391960  |

### 1e\_carbene\_s.log

SCF Done: E(RB3LYP) = -997.483291888 A.U. after 11 cycles

Zero-point correction= 0.143455  
(Hartree/Particle)  
Thermal correction to Energy= 0.158141  
Thermal correction to Enthalpy= 0.159086  
Thermal correction to Gibbs Free Energy= 0.100736  
Sum of electronic and zero-point Energies= -997.339837  
Sum of electronic and thermal Energies= -997.325151  
Sum of electronic and thermal Enthalpies= -997.324206  
Sum of electronic and thermal Free Energies= -997.382556

|       | E (Thermal) | CV             | S              |
|-------|-------------|----------------|----------------|
|       | KCal/Mol    | Cal/Mol-Kelvin | Cal/Mol-Kelvin |
| Total | 99.235      | 55.285         | 122.808        |

| Center<br>Number | Atomic<br>Number | Atomic<br>Type | Coordinates (Angstroms) |           |           |
|------------------|------------------|----------------|-------------------------|-----------|-----------|
|                  |                  |                | X                       | Y         | Z         |
| 1                | 6                | 0              | 1.881144                | 1.347544  | 0.193683  |
| 2                | 6                | 0              | 0.578359                | 0.888523  | 0.349127  |
| 3                | 6                | 0              | 0.240494                | -0.489892 | 0.307799  |
| 4                | 6                | 0              | 1.326234                | -1.367937 | 0.045179  |
| 5                | 6                | 0              | 2.616522                | -0.919392 | -0.187506 |
| 6                | 6                | 0              | 2.902874                | 0.445497  | -0.096761 |
| 7                | 6                | 0              | -1.025513               | -1.031765 | 0.716351  |
| 8                | 6                | 0              | -2.251886               | -0.486566 | 0.236600  |
| 9                | 6                | 0              | -2.399815               | 0.220049  | -0.993008 |
| 10               | 6                | 0              | -3.426053               | -0.754278 | 0.995907  |

|    |   |   |           |           |           |
|----|---|---|-----------|-----------|-----------|
| 11 | 6 | 0 | -3.650740 | 0.631643  | -1.430952 |
| 12 | 6 | 0 | -4.667185 | -0.281277 | 0.587256  |
| 13 | 6 | 0 | -4.781468 | 0.399021  | -0.632585 |
| 14 | 9 | 0 | -0.363770 | 1.805476  | 0.641098  |
| 15 | 9 | 0 | 2.159084  | 2.657437  | 0.288972  |
| 16 | 9 | 0 | 4.151906  | 0.882791  | -0.289929 |
| 17 | 9 | 0 | 3.602411  | -1.783259 | -0.472642 |
| 18 | 9 | 0 | 1.099412  | -2.685941 | -0.022430 |
| 19 | 1 | 0 | -1.520771 | 0.411946  | -1.601940 |
| 20 | 1 | 0 | -3.755432 | 1.149090  | -2.380881 |
| 21 | 1 | 0 | -5.757155 | 0.738861  | -0.971178 |
| 22 | 1 | 0 | -5.550990 | -0.466199 | 1.191515  |
| 23 | 1 | 0 | -3.314839 | -1.329256 | 1.910308  |

### 1e\_carbene\_t.log

SCF Done: E(UB3LYP) = -997.493466167 A.U. after 1 cycles

Zero-point correction= 0.142613  
(Hartree/Particle)  
Thermal correction to Energy= 0.157532  
Thermal correction to Enthalpy= 0.158476  
Thermal correction to Gibbs Free Energy= 0.098009  
Sum of electronic and zero-point Energies= -997.350853  
Sum of electronic and thermal Energies= -997.335935  
Sum of electronic and thermal Enthalpies= -997.334990  
Sum of electronic and thermal Free Energies= -997.395457

|       | E (Thermal) | CV             | S              |
|-------|-------------|----------------|----------------|
|       | KCal/Mol    | Cal/Mol-Kelvin | Cal/Mol-Kelvin |
| Total | 98.853      | 55.797         | 127.262        |

| Center<br>Number | Atomic<br>Number | Atomic<br>Type | Coordinates (Angstroms) |           |           |
|------------------|------------------|----------------|-------------------------|-----------|-----------|
|                  |                  |                | X                       | Y         | Z         |
| 1                | 6                | 0              | 2.076343                | 1.328464  | -0.164995 |
| 2                | 6                | 0              | 0.740332                | 0.972622  | -0.246123 |
| 3                | 6                | 0              | 0.297547                | -0.378484 | -0.130104 |
| 4                | 6                | 0              | 1.329780                | -1.342409 | 0.062345  |
| 5                | 6                | 0              | 2.668288                | -0.996845 | 0.138864  |
| 6                | 6                | 0              | 3.050344                | 0.343677  | 0.025293  |
| 7                | 6                | 0              | -1.035361               | -0.765754 | -0.257667 |
| 8                | 6                | 0              | -2.371640               | -0.384154 | -0.088672 |
| 9                | 6                | 0              | -3.390480               | -0.939700 | -0.916927 |
| 10               | 6                | 0              | -2.766224               | 0.521525  | 0.942672  |

|    |   |   |           |           |           |
|----|---|---|-----------|-----------|-----------|
| 11 | 6 | 0 | -4.722119 | -0.592172 | -0.731719 |
| 12 | 6 | 0 | -4.102578 | 0.858966  | 1.111322  |
| 13 | 6 | 0 | -5.088230 | 0.308099  | 0.279353  |
| 14 | 9 | 0 | -0.169330 | 1.942505  | -0.440281 |
| 15 | 9 | 0 | 2.447977  | 2.613077  | -0.274957 |
| 16 | 9 | 0 | 4.342632  | 0.682744  | 0.100238  |
| 17 | 9 | 0 | 3.606210  | -1.937157 | 0.326865  |
| 18 | 9 | 0 | 0.994373  | -2.636708 | 0.179551  |
| 19 | 1 | 0 | -3.106164 | -1.638930 | -1.697816 |
| 20 | 1 | 0 | -5.483576 | -1.022587 | -1.376898 |
| 21 | 1 | 0 | -6.131773 | 0.575922  | 0.419825  |
| 22 | 1 | 0 | -4.383320 | 1.555185  | 1.897516  |
| 23 | 1 | 0 | -2.007949 | 0.947258  | 1.592769  |

### 1f+.log

SCF Done: E(RB3LYP) = -838.811631723 A.U. after 1 cycles

Zero-point correction= 0.203880  
(Hartree/Particle)  
Thermal correction to Energy= 0.217608  
Thermal correction to Enthalpy= 0.218552  
Thermal correction to Gibbs Free Energy= 0.160056  
Sum of electronic and zero-point Energies= -838.607751  
Sum of electronic and thermal Energies= -838.594024  
Sum of electronic and thermal Enthalpies= -838.593080  
Sum of electronic and thermal Free Energies= -838.651576

|       | E (Thermal)<br>KCal/Mol | CV<br>Cal/Mol-Kelvin | S<br>Cal/Mol-Kelvin |
|-------|-------------------------|----------------------|---------------------|
| Total | 136.551                 | 53.035               | 123.116             |

| Center<br>Number | Atomic<br>Number | Atomic<br>Type | Coordinates (Angstroms) |           |           |
|------------------|------------------|----------------|-------------------------|-----------|-----------|
|                  |                  |                | X                       | Y         | Z         |
| 1                | 6                | 0              | -5.301281               | 0.440086  | -0.298042 |
| 2                | 6                | 0              | -4.084896               | 1.101101  | -0.281041 |
| 3                | 6                | 0              | -2.877177               | 0.400274  | 0.028450  |
| 4                | 6                | 0              | -2.962291               | -0.977326 | 0.398805  |
| 5                | 6                | 0              | -4.186697               | -1.620552 | 0.403721  |
| 6                | 6                | 0              | -5.352285               | -0.920759 | 0.040763  |
| 7                | 1                | 0              | -6.210690               | 0.972576  | -0.557663 |
| 8                | 1                | 0              | -4.034513               | 2.156922  | -0.533630 |
| 9                | 1                | 0              | -2.079343               | -1.504404 | 0.740710  |
| 10               | 1                | 0              | -4.253462               | -2.660801 | 0.706702  |



|    |   |   |           |           |           |
|----|---|---|-----------|-----------|-----------|
| 11 | 6 | 0 | -1.675410 | 1.143049  | -0.020517 |
| 12 | 1 | 0 | -1.814320 | 2.224486  | -0.042167 |
| 13 | 6 | 0 | -0.313124 | 0.729534  | -0.044905 |
| 14 | 6 | 0 | 0.127555  | -0.574854 | -0.411734 |
| 15 | 6 | 0 | 0.665294  | 1.709784  | 0.284006  |
| 16 | 6 | 0 | 1.475126  | -0.885311 | -0.395429 |
| 17 | 1 | 0 | -0.581508 | -1.311866 | -0.769556 |
| 18 | 6 | 0 | 2.013832  | 1.385278  | 0.325621  |
| 19 | 1 | 0 | 0.347790  | 2.718260  | 0.534525  |
| 20 | 6 | 0 | 2.415743  | 0.087379  | -0.010276 |
| 21 | 1 | 0 | 1.811196  | -1.872970 | -0.695287 |
| 22 | 1 | 0 | 2.750458  | 2.131150  | 0.602542  |
| 23 | 6 | 0 | 3.885800  | -0.298782 | -0.002709 |
| 24 | 9 | 0 | 4.087535  | -1.358089 | 0.810193  |
| 25 | 9 | 0 | 4.671646  | 0.707229  | 0.418408  |
| 26 | 9 | 0 | 4.284376  | -0.652519 | -1.243459 |
| 27 | 1 | 0 | -6.308749 | -1.436346 | 0.047262  |

### 1fH.log

SCF Done: E(RB3LYP) = -839.695029863 A.U. after 1 cycles

Zero-point correction= 0.214270  
(Hartree/Particle)  
Thermal correction to Energy= 0.228333  
Thermal correction to Enthalpy= 0.229277  
Thermal correction to Gibbs Free Energy= 0.168044  
Sum of electronic and zero-point Energies= -839.480760  
Sum of electronic and thermal Energies= -839.466697  
Sum of electronic and thermal Enthalpies= -839.465753  
Sum of electronic and thermal Free Energies= -839.526986

|       | E (Thermal) | CV             | S              |
|-------|-------------|----------------|----------------|
|       | KCal/Mol    | Cal/Mol-Kelvin | Cal/Mol-Kelvin |
| Total | 143.281     | 53.969         | 128.876        |

| Center<br>Number | Atomic<br>Number | Atomic<br>Type | Coordinates (Angstroms) |           |           |
|------------------|------------------|----------------|-------------------------|-----------|-----------|
|                  |                  |                | X                       | Y         | Z         |
| 1                | 6                | 0              | -3.985825               | 0.893960  | 1.447575  |
| 2                | 6                | 0              | -2.968361               | -0.017652 | 1.162356  |
| 3                | 6                | 0              | -2.845243               | -0.581190 | -0.117554 |
| 4                | 6                | 0              | -3.766805               | -0.205887 | -1.103409 |
| 5                | 6                | 0              | -4.788002               | 0.708718  | -0.822711 |
| 6                | 6                | 0              | -4.900278               | 1.261663  | 0.454199  |

|    |   |   |           |           |           |
|----|---|---|-----------|-----------|-----------|
| 7  | 1 | 0 | -4.065765 | 1.318414  | 2.445336  |
| 8  | 1 | 0 | -2.258650 | -0.292663 | 1.939951  |
| 9  | 1 | 0 | -3.689585 | -0.635400 | -2.100468 |
| 10 | 1 | 0 | -5.493090 | 0.986050  | -1.602459 |
| 11 | 6 | 0 | -1.742644 | -1.583936 | -0.419712 |
| 12 | 1 | 0 | -1.851824 | -2.457971 | 0.235296  |
| 13 | 1 | 0 | -1.874117 | -1.954867 | -1.445079 |
| 14 | 6 | 0 | -0.330381 | -1.038864 | -0.270228 |
| 15 | 6 | 0 | 0.613675  | -1.698998 | 0.525244  |
| 16 | 6 | 0 | 0.066098  | 0.128563  | -0.943381 |
| 17 | 6 | 0 | 1.920313  | -1.218778 | 0.648057  |
| 18 | 1 | 0 | 0.328551  | -2.602846 | 1.058821  |
| 19 | 6 | 0 | 1.365019  | 0.615696  | -0.829860 |
| 20 | 1 | 0 | -0.653994 | 0.666146  | -1.555072 |
| 21 | 6 | 0 | 2.297399  | -0.058209 | -0.029587 |
| 22 | 1 | 0 | 2.635957  | -1.743228 | 1.272826  |
| 23 | 1 | 0 | 1.654125  | 1.520960  | -1.355685 |
| 24 | 6 | 0 | 3.706892  | 0.459293  | 0.052638  |
| 25 | 9 | 0 | 4.397438  | -0.067625 | 1.093306  |
| 26 | 9 | 0 | 3.748942  | 1.810617  | 0.191075  |
| 27 | 9 | 0 | 4.421362  | 0.172232  | -1.072296 |
| 28 | 1 | 0 | -5.692440 | 1.972131  | 0.676002  |

1f+\_troplium\_1.log

SCF Done: E(RB3LYP) = -838.800542647 A.U. after 1 cycles

Zero-point correction= 0.204529  
(Hartree/Particle)  
Thermal correction to Energy= 0.218140  
Thermal correction to Enthalpy= 0.219084  
Thermal correction to Gibbs Free Energy= 0.162367  
Sum of electronic and zero-point Energies= -838.596013  
Sum of electronic and thermal Energies= -838.582403  
Sum of electronic and thermal Enthalpies= -838.581459  
Sum of electronic and thermal Free Energies= -838.638176

|       | E (Thermal) | CV             | S              |
|-------|-------------|----------------|----------------|
|       | KCal/Mol    | Cal/Mol-Kelvin | Cal/Mol-Kelvin |
| Total | 136.885     | 52.959         | 119.372        |

| Center<br>Number | Atomic<br>Number | Atomic<br>Type | Coordinates (Angstroms) |          |          |
|------------------|------------------|----------------|-------------------------|----------|----------|
|                  |                  |                | X                       | Y        | Z        |
| 1                | 6                | 0              | 0.696611                | 2.092633 | 0.405313 |

|    |   |   |           |           |           |
|----|---|---|-----------|-----------|-----------|
| 2  | 6 | 0 | 1.946619  | 1.452728  | 0.279183  |
| 3  | 6 | 0 | 2.188683  | 0.114489  | 0.018042  |
| 4  | 6 | 0 | -0.588274 | 1.579317  | 0.313138  |
| 5  | 6 | 0 | 1.230346  | -0.903074 | -0.180602 |
| 6  | 6 | 0 | -1.032250 | 0.254887  | 0.050843  |
| 7  | 6 | 0 | -0.154731 | -0.839222 | -0.172519 |
| 8  | 1 | 0 | 0.752026  | 3.156203  | 0.626410  |
| 9  | 1 | 0 | -1.377111 | 2.302421  | 0.498401  |
| 10 | 1 | 0 | 1.638450  | -1.889740 | -0.387991 |
| 11 | 1 | 0 | -0.643787 | -1.781493 | -0.400760 |
| 12 | 6 | 0 | -2.479630 | 0.003334  | 0.008498  |
| 13 | 6 | 0 | -3.012861 | -1.224026 | 0.466909  |
| 14 | 6 | 0 | -3.368891 | 0.983271  | -0.491393 |
| 15 | 6 | 0 | -4.384315 | -1.453535 | 0.438495  |
| 16 | 1 | 0 | -2.362360 | -1.978834 | 0.899140  |
| 17 | 6 | 0 | -4.736543 | 0.735894  | -0.543773 |
| 18 | 1 | 0 | -2.988135 | 1.917845  | -0.893022 |
| 19 | 6 | 0 | -5.248925 | -0.478703 | -0.072971 |
| 20 | 1 | 0 | -4.781410 | -2.389142 | 0.820348  |
| 21 | 1 | 0 | -5.403796 | 1.486256  | -0.956794 |
| 22 | 1 | 0 | 2.816730  | 2.089896  | 0.406793  |
| 23 | 6 | 0 | 3.644201  | -0.355783 | -0.081550 |
| 24 | 9 | 0 | 4.519615  | 0.639388  | 0.125241  |
| 25 | 9 | 0 | 3.878578  | -1.321326 | 0.830622  |
| 26 | 9 | 0 | 3.875992  | -0.876047 | -1.304075 |
| 27 | 1 | 0 | -6.318511 | -0.664818 | -0.104297 |

-----

**1f+\_troplium\_2.log**

SCF Done: E(RB3LYP) = -838.807685407 A.U. after 11 cycles

Zero-point correction= 0.204575  
(Hartree/Particle)  
Thermal correction to Energy= 0.218262  
Thermal correction to Enthalpy= 0.219207  
Thermal correction to Gibbs Free Energy= 0.160992  
Sum of electronic and zero-point Energies= -838.603110  
Sum of electronic and thermal Energies= -838.589423  
Sum of electronic and thermal Enthalpies= -838.588479  
Sum of electronic and thermal Free Energies= -838.646693

|       | E (Thermal) | CV             | S              |
|-------|-------------|----------------|----------------|
|       | KCal/Mol    | Cal/Mol-Kelvin | Cal/Mol-Kelvin |
| Total | 136.962     | 52.936         | 122.523        |

-----

| Center<br>Number | Atomic<br>Number | Atomic<br>Type | Coordinates (Angstroms) |           |           |
|------------------|------------------|----------------|-------------------------|-----------|-----------|
|                  |                  |                | X                       | Y         | Z         |
| 1                | 6                | 0              | 3.978631                | 1.505847  | 0.406619  |
| 2                | 6                | 0              | 5.093525                | 0.677273  | 0.191862  |
| 3                | 6                | 0              | 5.098739                | -0.666160 | -0.165548 |
| 4                | 6                | 0              | 2.621357                | 1.209401  | 0.326216  |
| 5                | 6                | 0              | 3.990303                | -1.499834 | -0.393563 |
| 6                | 6                | 0              | 1.965540                | -0.001647 | -0.005539 |
| 7                | 6                | 0              | 2.630808                | -1.209665 | -0.329336 |
| 8                | 1                | 0              | 4.209479                | 2.529770  | 0.692687  |
| 9                | 1                | 0              | 1.962282                | 2.034618  | 0.581793  |
| 10               | 1                | 0              | 4.229259                | -2.522692 | -0.676776 |
| 11               | 1                | 0              | 1.978706                | -2.037973 | -0.592632 |
| 12               | 6                | 0              | 0.486452                | -0.004763 | -0.013904 |
| 13               | 6                | 0              | -0.232682               | -1.121060 | 0.460864  |
| 14               | 6                | 0              | -0.231480               | 1.107665  | -0.498551 |
| 15               | 6                | 0              | -1.623775               | -1.118937 | 0.463266  |
| 16               | 1                | 0              | 0.290061                | -1.978282 | 0.875187  |
| 17               | 6                | 0              | -1.622851               | 1.099705  | -0.518496 |
| 18               | 1                | 0              | 0.292655                | 1.965234  | -0.910442 |
| 19               | 6                | 0              | -2.319895               | -0.011213 | -0.032557 |
| 20               | 1                | 0              | -2.166008               | -1.975816 | 0.849375  |
| 21               | 1                | 0              | -2.163712               | 1.949811  | -0.920671 |
| 22               | 1                | 0              | 6.074642                | -1.130244 | -0.287649 |
| 23               | 6                | 0              | -3.834798               | 0.001331  | 0.004208  |
| 24               | 9                | 0              | -4.344998               | -1.237856 | -0.157768 |
| 25               | 9                | 0              | -4.350710               | 0.791393  | -0.960239 |
| 26               | 9                | 0              | -4.279001               | 0.470032  | 1.194702  |
| 27               | 1                | 0              | 6.065769                | 1.145806  | 0.325626  |

### 1f\_carbene\_s.log

SCF Done: E(RB3LYP) = -838.375484803 A.U. after 11 cycles

Zero-point correction= 0.189148  
(Hartree/Particle)  
Thermal correction to Energy= 0.202902  
Thermal correction to Enthalpy= 0.203846  
Thermal correction to Gibbs Free Energy= 0.145241  
Sum of electronic and zero-point Energies= -838.186337  
Sum of electronic and thermal Energies= -838.172583  
Sum of electronic and thermal Enthalpies= -838.171639  
Sum of electronic and thermal Free Energies= -838.230244

| E (Thermal) | CV             | S              |
|-------------|----------------|----------------|
| KCal/Mol    | Cal/Mol-Kelvin | Cal/Mol-Kelvin |

Total 127.323 53.005 123.345

| Center Number | Atomic Number | Atomic Type | Coordinates (Angstroms) |           |           |
|---------------|---------------|-------------|-------------------------|-----------|-----------|
|               |               |             | X                       | Y         | Z         |
| 1             | 6             | 0           | 5.194212                | 0.124679  | 0.534311  |
| 2             | 6             | 0           | 4.069858                | 0.939121  | 0.597416  |
| 3             | 6             | 0           | 2.835042                | 0.532641  | 0.019207  |
| 4             | 6             | 0           | 2.807252                | -0.704347 | -0.688874 |
| 5             | 6             | 0           | 3.954168                | -1.482089 | -0.809369 |
| 6             | 6             | 0           | 5.141122                | -1.079727 | -0.181989 |
| 7             | 1             | 0           | 6.122170                | 0.434706  | 1.007318  |
| 8             | 1             | 0           | 4.099376                | 1.900768  | 1.101348  |
| 9             | 1             | 0           | 1.885170                | -1.018337 | -1.169115 |
| 10            | 1             | 0           | 3.928403                | -2.408625 | -1.377364 |
| 11            | 6             | 0           | 1.720577                | 1.424331  | 0.127889  |
| 12            | 6             | 0           | 0.385001                | 0.907255  | 0.067530  |
| 13            | 6             | 0           | -0.028736               | -0.264467 | 0.759407  |
| 14            | 6             | 0           | -0.611075               | 1.651726  | -0.622237 |
| 15            | 6             | 0           | -1.363574               | -0.659730 | 0.767549  |
| 16            | 1             | 0           | 0.702396                | -0.835110 | 1.324122  |
| 17            | 6             | 0           | -1.923898               | 1.209579  | -0.681595 |
| 18            | 1             | 0           | -0.316712               | 2.572984  | -1.115919 |
| 19            | 6             | 0           | -2.308806               | 0.058845  | 0.027331  |
| 20            | 1             | 0           | -1.665754               | -1.542416 | 1.322192  |
| 21            | 1             | 0           | -2.663454               | 1.771360  | -1.244467 |
| 22            | 6             | 0           | -3.756041               | -0.351359 | 0.027747  |
| 23            | 9             | 0           | -3.936235               | -1.628166 | 0.445011  |
| 24            | 9             | 0           | -4.312544               | -0.253972 | -1.207971 |
| 25            | 9             | 0           | -4.508284               | 0.435951  | 0.846408  |
| 26            | 1             | 0           | 6.031361                | -1.698393 | -0.265084 |

### 1f\_carbene\_t.log

SCF Done: E(UB3LYP) = -838.384444837 A.U. after 11 cycles

Zero-point correction= 0.188265  
(Hartree/Particle)  
Thermal correction to Energy= 0.202223  
Thermal correction to Enthalpy= 0.203167  
Thermal correction to Gibbs Free Energy= 0.142491  
Sum of electronic and zero-point Energies= -838.196179  
Sum of electronic and thermal Energies= -838.182222  
Sum of electronic and thermal Enthalpies= -838.181278  
Sum of electronic and thermal Free Energies= -838.241954

|       |             |                |                |
|-------|-------------|----------------|----------------|
|       | E (Thermal) | CV             | S              |
|       | KCal/Mol    | Cal/Mol-Kelvin | Cal/Mol-Kelvin |
| Total | 126.897     | 53.448         | 127.704        |

| Center<br>Number | Atomic<br>Number | Atomic<br>Type | Coordinates (Angstroms) |           |           |
|------------------|------------------|----------------|-------------------------|-----------|-----------|
|                  |                  |                | X                       | Y         | Z         |
| 1                | 6                | 0              | 5.310612                | -0.502483 | -0.608358 |
| 2                | 6                | 0              | 4.036817                | -1.057142 | -0.603702 |
| 3                | 6                | 0              | 2.950673                | -0.383892 | 0.026479  |
| 4                | 6                | 0              | 3.221138                | 0.863817  | 0.666444  |
| 5                | 6                | 0              | 4.500626                | 1.405802  | 0.649570  |
| 6                | 6                | 0              | 5.552523                | 0.730869  | 0.013759  |
| 7                | 1                | 0              | 6.123850                | -1.030561 | -1.099737 |
| 8                | 1                | 0              | 3.850436                | -2.012761 | -1.085466 |
| 9                | 1                | 0              | 2.413663                | 1.382408  | 1.175573  |
| 10               | 1                | 0              | 4.685063                | 2.358683  | 1.139593  |
| 11               | 6                | 0              | 1.668139                | -0.956215 | 0.057981  |
| 12               | 6                | 0              | 0.304223                | -0.642984 | 0.054875  |
| 13               | 6                | 0              | -0.179035               | 0.587584  | -0.490984 |
| 14               | 6                | 0              | -0.661276               | -1.561813 | 0.564400  |
| 15               | 6                | 0              | -1.534364               | 0.878139  | -0.503166 |
| 16               | 1                | 0              | 0.530958                | 1.297365  | -0.904631 |
| 17               | 6                | 0              | -2.014383               | -1.262934 | 0.543224  |
| 18               | 1                | 0              | -0.317893               | -2.505069 | 0.978390  |
| 19               | 6                | 0              | -2.461693               | -0.040145 | 0.015976  |
| 20               | 1                | 0              | -1.879929               | 1.820808  | -0.916573 |
| 21               | 1                | 0              | -2.730725               | -1.973410 | 0.943863  |
| 22               | 6                | 0              | -3.932061               | 0.257257  | -0.052001 |
| 23               | 9                | 0              | -4.193612               | 1.587566  | 0.016051  |
| 24               | 9                | 0              | -4.626502               | -0.337645 | 0.950922  |
| 25               | 9                | 0              | -4.490787               | -0.182349 | -1.216483 |
| 26               | 1                | 0              | 6.551036                | 1.159224  | 0.007602  |

### 1g+.log

SCF Done: E(RB3LYP) = -799.472366278 A.U. after 1 cycles

|                                            |             |
|--------------------------------------------|-------------|
| Zero-point correction=                     | 0.174635    |
| (Hartree/Particle)                         |             |
| Thermal correction to Energy=              | 0.187148    |
| Thermal correction to Enthalpy=            | 0.188093    |
| Thermal correction to Gibbs Free Energy=   | 0.134455    |
| Sum of electronic and zero-point Energies= | -799.297731 |

Sum of electronic and thermal Energies= -799.285218  
 Sum of electronic and thermal Enthalpies= -799.284274  
 Sum of electronic and thermal Free Energies= -799.337911

|       | E (Thermal)<br>KCal/Mol | CV<br>Cal/Mol-Kelvin | S<br>Cal/Mol-Kelvin |
|-------|-------------------------|----------------------|---------------------|
| Total | 117.437                 | 49.081               | 112.889             |

| Center<br>Number | Atomic<br>Number | Atomic<br>Type | Coordinates (Angstroms) |           |           |
|------------------|------------------|----------------|-------------------------|-----------|-----------|
|                  |                  |                | X                       | Y         | Z         |
| 1                | 6                | 0              | -3.505971               | 0.801416  | 0.203538  |
| 2                | 6                | 0              | -2.243707               | 1.361704  | 0.097307  |
| 3                | 6                | 0              | -1.126214               | 0.510907  | -0.126125 |
| 4                | 6                | 0              | -1.332851               | -0.883499 | -0.305423 |
| 5                | 6                | 0              | -2.621274               | -1.378610 | -0.217310 |
| 6                | 6                | 0              | -3.727716               | -0.566629 | 0.048309  |
| 7                | 6                | 0              | 0.153115                | 1.143218  | -0.190584 |
| 8                | 1                | 0              | 0.108661                | 2.217131  | -0.371701 |
| 9                | 6                | 0              | 1.456319                | 0.625949  | -0.058150 |
| 10               | 6                | 0              | 2.538521                | 1.476893  | -0.458729 |
| 11               | 6                | 0              | 1.769847                | -0.663526 | 0.481606  |
| 12               | 6                | 0              | 3.847466                | 1.045378  | -0.403175 |
| 13               | 6                | 0              | 3.076899                | -1.092949 | 0.562377  |
| 14               | 6                | 0              | 4.092998                | -0.238463 | 0.101927  |
| 15               | 1                | 0              | -0.531793               | -1.556520 | -0.582580 |
| 16               | 1                | 0              | -4.727827               | -0.984175 | 0.106843  |
| 17               | 1                | 0              | -2.122682               | 2.433897  | 0.213061  |
| 18               | 1                | 0              | 0.984811                | -1.288691 | 0.889696  |
| 19               | 1                | 0              | 4.677338                | 1.666505  | -0.723352 |
| 20               | 1                | 0              | 2.317619                | 2.469963  | -0.840183 |
| 21               | 1                | 0              | 3.342296                | -2.054817 | 0.988646  |
| 22               | 9                | 0              | -4.554962               | 1.597007  | 0.442840  |
| 23               | 9                | 0              | -2.827614               | -2.688260 | -0.408400 |
| 24               | 9                | 0              | 5.347796                | -0.659193 | 0.177357  |

**1gH.log**

SCF Done: E(RB3LYP) = -799.472366278 A.U. after 1 cycles

Zero-point correction= 0.174635  
 (Hartree/Particle)  
 Thermal correction to Energy= 0.187148  
 Thermal correction to Enthalpy= 0.188093  
 Thermal correction to Gibbs Free Energy= 0.134455

Sum of electronic and zero-point Energies= -799.297731  
 Sum of electronic and thermal Energies= -799.285218  
 Sum of electronic and thermal Enthalpies= -799.284274  
 Sum of electronic and thermal Free Energies= -799.337911

|       | E (Thermal)<br>KCal/Mol | CV<br>Cal/Mol-Kelvin | S<br>Cal/Mol-Kelvin |
|-------|-------------------------|----------------------|---------------------|
| Total | 117.437                 | 49.081               | 112.889             |

| Center<br>Number | Atomic<br>Number | Atomic<br>Type | Coordinates (Angstroms) |           |           |
|------------------|------------------|----------------|-------------------------|-----------|-----------|
|                  |                  |                | X                       | Y         | Z         |
| 1                | 6                | 0              | -3.505971               | 0.801416  | 0.203538  |
| 2                | 6                | 0              | -2.243707               | 1.361704  | 0.097307  |
| 3                | 6                | 0              | -1.126214               | 0.510907  | -0.126125 |
| 4                | 6                | 0              | -1.332851               | -0.883499 | -0.305423 |
| 5                | 6                | 0              | -2.621274               | -1.378610 | -0.217310 |
| 6                | 6                | 0              | -3.727716               | -0.566629 | 0.048309  |
| 7                | 6                | 0              | 0.153115                | 1.143218  | -0.190584 |
| 8                | 1                | 0              | 0.108661                | 2.217131  | -0.371701 |
| 9                | 6                | 0              | 1.456319                | 0.625949  | -0.058150 |
| 10               | 6                | 0              | 2.538521                | 1.476893  | -0.458729 |
| 11               | 6                | 0              | 1.769847                | -0.663526 | 0.481606  |
| 12               | 6                | 0              | 3.847466                | 1.045378  | -0.403175 |
| 13               | 6                | 0              | 3.076899                | -1.092949 | 0.562377  |
| 14               | 6                | 0              | 4.092998                | -0.238463 | 0.101927  |
| 15               | 1                | 0              | -0.531793               | -1.556520 | -0.582580 |
| 16               | 1                | 0              | -4.727827               | -0.984175 | 0.106843  |
| 17               | 1                | 0              | -2.122682               | 2.433897  | 0.213061  |
| 18               | 1                | 0              | 0.984811                | -1.288691 | 0.889696  |
| 19               | 1                | 0              | 4.677338                | 1.666505  | -0.723352 |
| 20               | 1                | 0              | 2.317619                | 2.469963  | -0.840183 |
| 21               | 1                | 0              | 3.342296                | -2.054817 | 0.988646  |
| 22               | 9                | 0              | -4.554962               | 1.597007  | 0.442840  |
| 23               | 9                | 0              | -2.827614               | -2.688260 | -0.408400 |
| 24               | 9                | 0              | 5.347796                | -0.659193 | 0.177357  |

**1g\_tropylium\_1.log**

SCF Done: E(RB3LYP) = -799.466680294 A.U. after 1 cycles

Zero-point correction= 0.175195  
 (Hartree/Particle)  
 Thermal correction to Energy= 0.187647  
 Thermal correction to Enthalpy= 0.188591



Thermal correction to Gibbs Free Energy= 0.135484  
 Sum of electronic and zero-point Energies= -799.291486  
 Sum of electronic and thermal Energies= -799.279033  
 Sum of electronic and thermal Enthalpies= -799.278089  
 Sum of electronic and thermal Free Energies= -799.331196

|       | E (Thermal)<br>KCal/Mol | CV<br>Cal/Mol-Kelvin | S<br>Cal/Mol-Kelvin |
|-------|-------------------------|----------------------|---------------------|
| Total | 117.750                 | 48.949               | 111.773             |

| Center<br>Number | Atomic<br>Number | Atomic<br>Type | Coordinates (Angstroms) |           |           |
|------------------|------------------|----------------|-------------------------|-----------|-----------|
|                  |                  |                | X                       | Y         | Z         |
| 1                | 6                | 0              | 2.733378                | 1.186549  | -0.545777 |
| 2                | 6                | 0              | 1.368282                | 0.981200  | -0.450170 |
| 3                | 6                | 0              | 1.212739                | -1.293543 | 0.589850  |
| 4                | 6                | 0              | 2.556553                | -1.648208 | 0.733779  |
| 5                | 6                | 0              | 3.716624                | -0.942124 | 0.404969  |
| 6                | 6                | 0              | 3.775004                | 0.323680  | -0.165040 |
| 7                | 1                | 0              | 0.766232                | 1.791648  | -0.850957 |
| 8                | 1                | 0              | 2.728028                | -2.622581 | 1.185527  |
| 9                | 6                | 0              | 0.631016                | -0.124388 | 0.057169  |
| 10               | 6                | 0              | -0.845778               | -0.035832 | 0.020475  |
| 11               | 6                | 0              | -1.615379               | -1.179167 | -0.272138 |
| 12               | 6                | 0              | -1.489259               | 1.190450  | 0.280632  |
| 13               | 6                | 0              | -2.999589               | -1.064207 | -0.306485 |
| 14               | 1                | 0              | -1.166351               | -2.133225 | -0.525838 |
| 15               | 6                | 0              | -2.877737               | 1.237010  | 0.255259  |
| 16               | 1                | 0              | -0.945240               | 2.087643  | 0.555417  |
| 17               | 6                | 0              | -3.665526               | 0.128806  | -0.041417 |
| 18               | 1                | 0              | -4.747925               | 0.192168  | -0.066054 |
| 19               | 1                | 0              | 0.510466                | -2.029720 | 0.970343  |
| 20               | 9                | 0              | -3.725132               | -2.151090 | -0.613539 |
| 21               | 9                | 0              | -3.484535               | 2.401947  | 0.532268  |
| 22               | 9                | 0              | 4.999989                | 0.797782  | -0.392420 |
| 23               | 1                | 0              | 4.675621                | -1.410547 | 0.611957  |
| 24               | 1                | 0              | 3.064305                | 2.125511  | -0.983814 |

**1g\_tropylium\_2.log**

SCF Done: E(RB3LYP) = -799.469612397 A.U. after 1 cycles

Zero-point correction= 0.175215  
 (Hartree/Particle)  
 Thermal correction to Energy= 0.187615

Thermal correction to Enthalpy= 0.188559  
 Thermal correction to Gibbs Free Energy= 0.135588  
 Sum of electronic and zero-point Energies= -799.294397  
 Sum of electronic and thermal Energies= -799.281998  
 Sum of electronic and thermal Enthalpies= -799.281053  
 Sum of electronic and thermal Free Energies= -799.334024

|       | E (Thermal)<br>KCal/Mol | CV<br>Cal/Mol-Kelvin | S<br>Cal/Mol-Kelvin |
|-------|-------------------------|----------------------|---------------------|
| Total | 117.730                 | 48.800               | 111.486             |

| Center<br>Number | Atomic<br>Number | Atomic<br>Type | Coordinates (Angstroms) |           |           |
|------------------|------------------|----------------|-------------------------|-----------|-----------|
|                  |                  |                | X                       | Y         | Z         |
| 1                | 6                | 0              | 2.303963                | 1.375325  | -0.188176 |
| 2                | 6                | 0              | 0.936447                | 1.114606  | -0.168556 |
| 3                | 6                | 0              | 0.917430                | -1.368094 | 0.184715  |
| 4                | 6                | 0              | 2.255905                | -1.687331 | 0.228003  |
| 5                | 6                | 0              | 3.370882                | -0.825978 | 0.115322  |
| 6                | 6                | 0              | 3.421366                | 0.539736  | -0.068191 |
| 7                | 1                | 0              | 0.329865                | 1.998174  | -0.343216 |
| 8                | 1                | 0              | 2.515078                | -2.731410 | 0.387063  |
| 9                | 6                | 0              | 0.261705                | -0.107273 | 0.006664  |
| 10               | 6                | 0              | -1.208036               | -0.093305 | 0.013349  |
| 11               | 6                | 0              | -1.946849               | -1.177027 | -0.518455 |
| 12               | 6                | 0              | -1.917754               | 1.009063  | 0.546219  |
| 13               | 6                | 0              | -3.334969               | -1.157748 | -0.534943 |
| 14               | 1                | 0              | -1.438742               | -2.020828 | -0.975478 |
| 15               | 6                | 0              | -3.305595               | 1.029007  | 0.559203  |
| 16               | 1                | 0              | -1.384778               | 1.836680  | 1.004638  |
| 17               | 6                | 0              | -3.991968               | -0.054935 | 0.010948  |
| 18               | 1                | 0              | 0.252716                | -2.211904 | 0.340963  |
| 19               | 9                | 0              | 4.550166                | -1.439849 | 0.208668  |
| 20               | 9                | 0              | 2.614666                | 2.661159  | -0.377751 |
| 21               | 9                | 0              | -5.329207               | -0.036962 | 0.010756  |
| 22               | 1                | 0              | 4.400203                | 1.007839  | -0.130626 |
| 23               | 1                | 0              | -3.910728               | -1.969870 | -0.966163 |
| 24               | 1                | 0              | -3.859399               | 1.855904  | 0.991151  |

**1g\_carbene\_s.log**

SCF Done: E(RB3LYP) = -799.040798958 A.U. after 11 cycles

Zero-point correction= 0.159958  
(Hartree/Particle)

Thermal correction to Energy= 0.172532  
 Thermal correction to Enthalpy= 0.173476  
 Thermal correction to Gibbs Free Energy= 0.119643  
 Sum of electronic and zero-point Energies= -798.880841  
 Sum of electronic and thermal Energies= -798.868267  
 Sum of electronic and thermal Enthalpies= -798.867323  
 Sum of electronic and thermal Free Energies= -798.921156

|       | E (Thermal)<br>KCal/Mol | CV<br>Cal/Mol-Kelvin | S<br>Cal/Mol-Kelvin |
|-------|-------------------------|----------------------|---------------------|
| Total | 108.265                 | 49.143               | 113.302             |

| Center<br>Number | Atomic<br>Number | Atomic<br>Type | Coordinates (Angstroms) |           |           |
|------------------|------------------|----------------|-------------------------|-----------|-----------|
|                  |                  |                | X                       | Y         | Z         |
| 1                | 6                | 0              | -2.503338               | 1.335673  | 0.363294  |
| 2                | 6                | 0              | -1.255151               | 0.770460  | 0.571781  |
| 3                | 6                | 0              | -1.079699               | -0.622145 | 0.339576  |
| 4                | 6                | 0              | -2.190438               | -1.380621 | -0.116924 |
| 5                | 6                | 0              | -3.382628               | -0.734804 | -0.386312 |
| 6                | 6                | 0              | -3.588156               | 0.622677  | -0.137085 |
| 7                | 6                | 0              | 0.139718                | -1.315863 | 0.650084  |
| 8                | 6                | 0              | 1.396409                | -0.728818 | 0.302686  |
| 9                | 6                | 0              | 2.548439                | -1.171290 | 1.013718  |
| 10               | 6                | 0              | 1.590649                | 0.213737  | -0.751097 |
| 11               | 6                | 0              | 3.809917                | -0.658623 | 0.746284  |
| 12               | 6                | 0              | 2.856605                | 0.684868  | -1.073355 |
| 13               | 6                | 0              | 3.936218                | 0.252561  | -0.302803 |
| 14               | 1                | 0              | 2.406447                | -1.918665 | 1.788292  |
| 15               | 1                | 0              | 0.735596                | 0.539993  | -1.334841 |
| 16               | 1                | 0              | -0.444455               | 1.383564  | 0.949479  |
| 17               | 1                | 0              | -2.098772               | -2.452510 | -0.252015 |
| 18               | 9                | 0              | -2.675092               | 2.657519  | 0.623992  |
| 19               | 9                | 0              | -4.428532               | -1.454722 | -0.864796 |
| 20               | 9                | 0              | 5.166374                | 0.723582  | -0.600642 |
| 21               | 1                | 0              | 4.690911                | -0.968455 | 1.299136  |
| 22               | 1                | 0              | 3.024561                | 1.379236  | -1.890791 |
| 23               | 1                | 0              | -4.550305               | 1.092546  | -0.305324 |

### 1g\_carbene\_t.log

SCF Done: E(UB3LYP) = -799.047639336 A.U. after 1 cycles

Zero-point correction= 0.159017  
 (Hartree/Particle)

Thermal correction to Energy= 0.171810  
 Thermal correction to Enthalpy= 0.172754  
 Thermal correction to Gibbs Free Energy= 0.116842  
 Sum of electronic and zero-point Energies= -798.888622  
 Sum of electronic and thermal Energies= -798.875829  
 Sum of electronic and thermal Enthalpies= -798.874885  
 Sum of electronic and thermal Free Energies= -798.930797

|       | E (Thermal)<br>KCal/Mol | CV<br>Cal/Mol-Kelvin | S<br>Cal/Mol-Kelvin |
|-------|-------------------------|----------------------|---------------------|
| Total | 107.812                 | 49.666               | 117.677             |

| Center<br>Number | Atomic<br>Number | Atomic<br>Type | Coordinates (Angstroms) |           |           |
|------------------|------------------|----------------|-------------------------|-----------|-----------|
|                  |                  |                | X                       | Y         | Z         |
| 1                | 6                | 0              | -2.755650               | 1.331829  | 0.277756  |
| 2                | 6                | 0              | -1.444730               | 0.901018  | 0.350534  |
| 3                | 6                | 0              | -1.153347               | -0.476640 | 0.105169  |
| 4                | 6                | 0              | -2.234873               | -1.357732 | -0.189165 |
| 5                | 6                | 0              | -3.519863               | -0.852438 | -0.237504 |
| 6                | 6                | 0              | -3.828707               | 0.489471  | -0.013364 |
| 7                | 6                | 0              | 0.158429                | -0.964562 | 0.187200  |
| 8                | 6                | 0              | 1.502419                | -0.565771 | 0.095820  |
| 9                | 6                | 0              | 2.511718                | -1.220914 | 0.859865  |
| 10               | 6                | 0              | 1.912980                | 0.468882  | -0.799308 |
| 11               | 6                | 0              | 3.847035                | -0.855138 | 0.752144  |
| 12               | 6                | 0              | 3.248021                | 0.838595  | -0.903825 |
| 13               | 6                | 0              | 4.192217                | 0.171094  | -0.125767 |
| 14               | 1                | 0              | 2.221507                | -2.017530 | 1.538238  |
| 15               | 1                | 0              | 1.167541                | 0.967147  | -1.411791 |
| 16               | 1                | 0              | -0.657258               | 1.602168  | 0.602976  |
| 17               | 1                | 0              | -2.054624               | -2.410202 | -0.376740 |
| 18               | 9                | 0              | -3.024200               | 2.642617  | 0.508272  |
| 19               | 9                | 0              | -4.542515               | -1.697844 | -0.522723 |
| 20               | 9                | 0              | 5.496708                | 0.530384  | -0.230703 |
| 21               | 1                | 0              | 4.619233                | -1.347384 | 1.334963  |
| 22               | 1                | 0              | 3.566786                | 1.626388  | -1.579424 |
| 23               | 1                | 0              | -4.847015               | 0.856834  | -0.059153 |

## 2.log

SCF Done: E(RB3LYP) = -601.611218284 A.U. after 1 cycles

Zero-point correction= 0.173577  
 (Hartree/Particle)

Thermal correction to Energy= 0.184011  
 Thermal correction to Enthalpy= 0.184956  
 Thermal correction to Gibbs Free Energy= 0.136678  
 Sum of electronic and zero-point Energies= -601.437641  
 Sum of electronic and thermal Energies= -601.427207  
 Sum of electronic and thermal Enthalpies= -601.426263  
 Sum of electronic and thermal Free Energies= -601.474541

|       | E (Thermal)<br>KCal/Mol | CV<br>Cal/Mol-Kelvin | S<br>Cal/Mol-Kelvin |
|-------|-------------------------|----------------------|---------------------|
| Total | 115.469                 | 38.699               | 101.610             |

| Center<br>Number | Atomic<br>Number | Atomic<br>Type | Coordinates (Angstroms) |           |           |
|------------------|------------------|----------------|-------------------------|-----------|-----------|
|                  |                  |                | X                       | Y         | Z         |
| 1                | 14               | 0              | 1.644193                | -0.437706 | -0.000072 |
| 2                | 1                | 0              | 1.861985                | -1.914371 | -0.000306 |
| 3                | 6                | 0              | 2.433536                | 0.305546  | 1.551764  |
| 4                | 1                | 0              | 2.007995                | -0.134375 | 2.461581  |
| 5                | 1                | 0              | 3.516309                | 0.127396  | 1.566046  |
| 6                | 1                | 0              | 2.274481                | 1.390274  | 1.602014  |
| 7                | 6                | 0              | 2.433758                | 0.306072  | -1.551536 |
| 8                | 1                | 0              | 3.516508                | 0.127791  | -1.565794 |
| 9                | 1                | 0              | 2.008245                | -0.133435 | -2.461568 |
| 10               | 1                | 0              | 2.274855                | 1.390842  | -1.601378 |
| 11               | 6                | 0              | -0.226990               | -0.168630 | -0.000091 |
| 12               | 6                | 0              | -1.117884               | -1.258269 | -0.000197 |
| 13               | 6                | 0              | -0.783665               | 1.125752  | 0.000079  |
| 14               | 6                | 0              | -2.503639               | -1.067674 | -0.000134 |
| 15               | 1                | 0              | -0.726152               | -2.273668 | -0.000347 |
| 16               | 6                | 0              | -2.166479               | 1.325157  | 0.000145  |
| 17               | 1                | 0              | -0.132273               | 1.998776  | 0.000147  |
| 18               | 6                | 0              | -3.031008               | 0.225921  | 0.000046  |
| 19               | 1                | 0              | -3.169201               | -1.927823 | -0.000224 |
| 20               | 1                | 0              | -2.569535               | 2.335302  | 0.000273  |
| 21               | 1                | 0              | -4.107691               | 0.377924  | 0.000114  |

## 2+.log

SCF Done: E(RB3LYP) = -600.742980759 A.U. after 1 cycles

Zero-point correction= 0.165212  
 (Hartree/Particle)  
 Thermal correction to Energy= 0.175724  
 Thermal correction to Enthalpy= 0.176668

Thermal correction to Gibbs Free Energy= 0.127834  
 Sum of electronic and zero-point Energies= -600.577768  
 Sum of electronic and thermal Energies= -600.567257  
 Sum of electronic and thermal Enthalpies= -600.566312  
 Sum of electronic and thermal Free Energies= -600.615147

|       | E (Thermal)<br>KCal/Mol | CV<br>Cal/Mol-Kelvin | S<br>Cal/Mol-Kelvin |
|-------|-------------------------|----------------------|---------------------|
| Total | 110.269                 | 37.398               | 102.780             |

| Center<br>Number | Atomic<br>Number | Atomic<br>Type | Coordinates (Angstroms) |           |           |
|------------------|------------------|----------------|-------------------------|-----------|-----------|
|                  |                  |                | X                       | Y         | Z         |
| 1                | 6                | 0              | 2.548857                | 1.583051  | -0.001013 |
| 2                | 1                | 0              | 3.408471                | 1.503894  | -0.678251 |
| 3                | 1                | 0              | 1.952121                | 2.453281  | -0.287777 |
| 4                | 1                | 0              | 2.956259                | 1.767279  | 1.004157  |
| 5                | 6                | 0              | 2.548812                | -1.583070 | 0.000999  |
| 6                | 1                | 0              | 3.408582                | -1.503874 | 0.678032  |
| 7                | 1                | 0              | 1.952095                | -2.453236 | 0.288001  |
| 8                | 1                | 0              | 2.955971                | -1.767451 | -1.004242 |
| 9                | 14               | 0              | 1.587431                | 0.000005  | 0.000005  |
| 10               | 6                | 0              | -0.218019               | 0.000003  | 0.000015  |
| 11               | 6                | 0              | -0.942053               | -1.223217 | 0.002492  |
| 12               | 6                | 0              | -0.942054               | 1.223223  | -0.002471 |
| 13               | 6                | 0              | -2.331703               | -1.218359 | 0.001006  |
| 14               | 1                | 0              | -0.418132               | -2.174880 | 0.004582  |
| 15               | 6                | 0              | -2.331704               | 1.218368  | -0.001013 |
| 16               | 1                | 0              | -0.418129               | 2.174885  | -0.004549 |
| 17               | 6                | 0              | -3.024353               | 0.000004  | -0.000011 |
| 18               | 1                | 0              | -2.878567               | -2.156271 | 0.001660  |
| 19               | 1                | 0              | -2.878568               | 2.156279  | -0.001680 |
| 20               | 1                | 0              | -4.110829               | 0.000004  | -0.000023 |

### 3.log

SCF Done: E(RB3LYP) = -645.735360586 A.U. after 1 cycles

Zero-point correction= 0.291469  
 (Hartree/Particle)  
 Thermal correction to Energy= 0.306832  
 Thermal correction to Enthalpy= 0.307776  
 Thermal correction to Gibbs Free Energy= 0.249795  
 Sum of electronic and zero-point Energies= -645.443891  
 Sum of electronic and thermal Energies= -645.428529

Sum of electronic and thermal Enthalpies= -645.427584  
 Sum of electronic and thermal Free Energies= -645.485566

|       | E (Thermal)<br>KCal/Mol | CV<br>Cal/Mol-Kelvin | S<br>Cal/Mol-Kelvin |
|-------|-------------------------|----------------------|---------------------|
| Total | 192.540                 | 55.877               | 122.032             |

| Center<br>Number | Atomic<br>Number | Atomic<br>Type | Coordinates (Angstroms) |           |           |
|------------------|------------------|----------------|-------------------------|-----------|-----------|
|                  |                  |                | X                       | Y         | Z         |
| 1                | 14               | 0              | -0.037414               | -0.056934 | -0.509909 |
| 2                | 1                | 0              | 0.155178                | -0.110606 | -1.994604 |
| 3                | 6                | 0              | -1.876135               | -0.498145 | -0.190158 |
| 4                | 1                | 0              | -1.995551               | -1.517020 | -0.591349 |
| 5                | 6                | 0              | -2.835924               | 0.414396  | -0.979883 |
| 6                | 1                | 0              | -2.610683               | 0.415972  | -2.053444 |
| 7                | 1                | 0              | -3.877739               | 0.084040  | -0.860664 |
| 8                | 1                | 0              | -2.787263               | 1.453793  | -0.629118 |
| 9                | 6                | 0              | 0.360812                | 1.734272  | 0.065715  |
| 10               | 1                | 0              | -0.589286               | 2.281823  | -0.041944 |
| 11               | 6                | 0              | 0.778238                | 1.832809  | 1.547964  |
| 12               | 1                | 0              | 0.907491                | 2.882910  | 1.846514  |
| 13               | 1                | 0              | 0.036010                | 1.390148  | 2.222868  |
| 14               | 1                | 0              | 1.733784                | 1.325722  | 1.732376  |
| 15               | 6                | 0              | 1.128718                | -1.369291 | 0.260258  |
| 16               | 1                | 0              | 1.056799                | -1.263810 | 1.354435  |
| 17               | 6                | 0              | 0.696362                | -2.805496 | -0.099906 |
| 18               | 1                | 0              | 1.382723                | -3.541386 | 0.343019  |
| 19               | 1                | 0              | -0.311741               | -3.041161 | 0.260601  |
| 20               | 1                | 0              | 0.706620                | -2.966520 | -1.186426 |
| 21               | 6                | 0              | 1.390347                | 2.443112  | -0.838760 |
| 22               | 1                | 0              | 1.075776                | 2.449820  | -1.888880 |
| 23               | 1                | 0              | 1.530138                | 3.487875  | -0.525590 |
| 24               | 1                | 0              | 2.373795                | 1.958310  | -0.794166 |
| 25               | 6                | 0              | 2.602726                | -1.143627 | -0.135059 |
| 26               | 1                | 0              | 2.738936                | -1.213143 | -1.222357 |
| 27               | 1                | 0              | 2.975608                | -0.163129 | 0.182364  |
| 28               | 1                | 0              | 3.250753                | -1.904152 | 0.323886  |
| 29               | 6                | 0              | -2.263238               | -0.537492 | 1.301598  |
| 30               | 1                | 0              | -2.193530               | 0.457130  | 1.761069  |
| 31               | 1                | 0              | -3.301135               | -0.877106 | 1.428446  |
| 32               | 1                | 0              | -1.624327               | -1.215656 | 1.881077  |

3+.log

SCF Done: E(RB3LYP) = -644.864248664 A.U. after 7 cycles

Zero-point correction= 0.282892  
 (Hartree/Particle)  
 Thermal correction to Energy= 0.298783  
 Thermal correction to Enthalpy= 0.299727  
 Thermal correction to Gibbs Free Energy= 0.238646  
 Sum of electronic and zero-point Energies= -644.581357  
 Sum of electronic and thermal Energies= -644.565466  
 Sum of electronic and thermal Enthalpies= -644.564522  
 Sum of electronic and thermal Free Energies= -644.625603

|       | E (Thermal) | CV             | S              |
|-------|-------------|----------------|----------------|
|       | KCal/Mol    | Cal/Mol-Kelvin | Cal/Mol-Kelvin |
| Total | 187.489     | 55.195         | 128.556        |

| Center<br>Number | Atomic<br>Number | Atomic<br>Type | Coordinates (Angstroms) |           |           |
|------------------|------------------|----------------|-------------------------|-----------|-----------|
|                  |                  |                | X                       | Y         | Z         |
| 1                | 14               | 0              | 0.142729                | -0.140448 | 0.027332  |
| 2                | 6                | 0              | -0.264417               | 1.672700  | -0.224984 |
| 3                | 1                | 0              | 0.686687                | 2.155260  | -0.488400 |
| 4                | 6                | 0              | -1.257372               | 1.884335  | -1.397698 |
| 5                | 1                | 0              | -2.233354               | 1.429831  | -1.197480 |
| 6                | 1                | 0              | -1.420144               | 2.960274  | -1.531301 |
| 7                | 1                | 0              | -0.881627               | 1.493907  | -2.350354 |
| 8                | 6                | 0              | -1.154007               | -1.457294 | 0.320901  |
| 9                | 1                | 0              | -0.651128               | -2.228657 | 0.923763  |
| 10               | 6                | 0              | -1.432180               | -2.084022 | -1.084187 |
| 11               | 1                | 0              | -2.088753               | -2.951881 | -0.950652 |
| 12               | 1                | 0              | -1.949623               | -1.385365 | -1.751079 |
| 13               | 1                | 0              | -0.527377               | -2.445440 | -1.588566 |
| 14               | 6                | 0              | 1.925916                | -0.704280 | -0.014082 |
| 15               | 1                | 0              | 1.911292                | -1.796987 | -0.129461 |
| 16               | 6                | 0              | 2.783077                | -0.083541 | -1.137310 |
| 17               | 1                | 0              | 3.807456                | -0.466903 | -1.063970 |
| 18               | 1                | 0              | 2.411096                | -0.335409 | -2.136435 |
| 19               | 1                | 0              | 2.838771                | 1.007739  | -1.056224 |
| 20               | 6                | 0              | -2.456190               | -1.033613 | 1.025919  |
| 21               | 1                | 0              | -3.004117               | -0.275450 | 0.456675  |
| 22               | 1                | 0              | -3.114239               | -1.904842 | 1.123352  |
| 23               | 1                | 0              | -2.276989               | -0.645019 | 2.033607  |
| 24               | 6                | 0              | -0.786955               | 2.317428  | 1.088084  |
| 25               | 1                | 0              | -0.080567               | 2.225015  | 1.921226  |
| 26               | 1                | 0              | -0.940831               | 3.388964  | 0.913909  |
| 27               | 1                | 0              | -1.747233               | 1.894536  | 1.399492  |
| 28               | 6                | 0              | 2.510312                | -0.382693 | 1.397103  |
| 29               | 1                | 0              | 1.955406                | -0.856150 | 2.216704  |
| 30               | 1                | 0              | 3.536206                | -0.767298 | 1.444063  |
| 31               | 1                | 0              | 2.561749                | 0.696021  | 1.586014  |



-----  
**4.log**

SCF Done: E(RB3LYP) = -527.802081838 A.U. after 1 cycles

Zero-point correction= 0.205945  
(Hartree/Particle)  
Thermal correction to Energy= 0.217545  
Thermal correction to Enthalpy= 0.218489  
Thermal correction to Gibbs Free Energy= 0.167796  
Sum of electronic and zero-point Energies= -527.596136  
Sum of electronic and thermal Energies= -527.584537  
Sum of electronic and thermal Enthalpies= -527.583593  
Sum of electronic and thermal Free Energies= -527.634286

|       | E (Thermal) | CV             | S              |
|-------|-------------|----------------|----------------|
|       | KCal/Mol    | Cal/Mol-Kelvin | Cal/Mol-Kelvin |
| Total | 136.511     | 40.012         | 106.693        |

-----

| Center<br>Number | Atomic<br>Number | Atomic<br>Type | Coordinates (Angstroms) |           |           |
|------------------|------------------|----------------|-------------------------|-----------|-----------|
|                  |                  |                | X                       | Y         | Z         |
| 1                | 6                | 0              | -0.193489               | 2.904878  | 0.163630  |
| 2                | 1                | 0              | 0.845411                | 3.005766  | -0.173492 |
| 3                | 1                | 0              | -0.187148               | 2.941786  | 1.260175  |
| 4                | 1                | 0              | -0.737420               | 3.789867  | -0.191222 |
| 5                | 6                | 0              | -0.835779               | 1.602456  | -0.350751 |
| 6                | 14               | 0              | -0.000140               | 0.000060  | 0.244669  |
| 7                | 1                | 0              | 0.000145                | 0.001454  | 1.742938  |
| 8                | 6                | 0              | -0.969422               | -1.526432 | -0.348127 |
| 9                | 6                | 0              | -2.420151               | -1.619203 | 0.162201  |
| 10               | 1                | 0              | -2.458622               | -1.629127 | 1.258627  |
| 11               | 1                | 0              | -3.025520               | -0.770690 | -0.179463 |
| 12               | 1                | 0              | -2.913859               | -2.533529 | -0.191507 |
| 13               | 6                | 0              | 1.805499                | -0.077466 | -0.350740 |
| 14               | 6                | 0              | 2.613387                | -1.284550 | 0.163270  |
| 15               | 1                | 0              | 2.645617                | -1.307099 | 1.259770  |
| 16               | 1                | 0              | 2.179951                | -2.234977 | -0.171449 |
| 17               | 1                | 0              | 3.650617                | -1.256695 | -0.194855 |
| 18               | 1                | 0              | -0.961863               | -1.539248 | -1.448681 |
| 19               | 1                | 0              | -0.845262               | 1.603159  | -1.451422 |
| 20               | 1                | 0              | 1.810471                | -0.069484 | -1.451524 |
| 21               | 1                | 0              | -0.415783               | -2.424425 | -0.038180 |
| 22               | 1                | 0              | 2.306723                | 0.852647  | -0.046170 |
| 23               | 1                | 0              | -1.891770               | 1.571654  | -0.045815 |

-----  
**4+.log**

SCF Done: E(RB3LYP) = -526.924621413 A.U. after 7 cycles

Zero-point correction= 0.197197  
(Hartree/Particle)  
Thermal correction to Energy= 0.208891  
Thermal correction to Enthalpy= 0.209835  
Thermal correction to Gibbs Free Energy= 0.158121  
Sum of electronic and zero-point Energies= -526.727424  
Sum of electronic and thermal Energies= -526.715731  
Sum of electronic and thermal Enthalpies= -526.714786  
Sum of electronic and thermal Free Energies= -526.766500

|       | E (Thermal) | CV             | S              |
|-------|-------------|----------------|----------------|
|       | KCal/Mol    | Cal/Mol-Kelvin | Cal/Mol-Kelvin |
| Total | 131.081     | 39.043         | 108.841        |

-----

| Center<br>Number | Atomic<br>Number | Atomic<br>Type | Coordinates (Angstroms) |           |           |
|------------------|------------------|----------------|-------------------------|-----------|-----------|
|                  |                  |                | X                       | Y         | Z         |
| 1                | 14               | 0              | 0.117551                | -0.105899 | 0.264115  |
| 2                | 6                | 0              | -0.168877               | 1.679304  | -0.160959 |
| 3                | 1                | 0              | 0.561108                | 2.261774  | 0.425072  |
| 4                | 1                | 0              | 0.180620                | 1.801126  | -1.201586 |
| 5                | 6                | 0              | -1.595732               | 2.236960  | 0.011486  |
| 6                | 1                | 0              | -1.928696               | 2.190169  | 1.053112  |
| 7                | 1                | 0              | -1.619154               | 3.287579  | -0.292974 |
| 8                | 1                | 0              | -2.323407               | 1.700489  | -0.605394 |
| 9                | 6                | 0              | -1.301665               | -1.246128 | 0.626149  |
| 10               | 1                | 0              | -0.960525               | -2.073136 | 1.260538  |
| 11               | 1                | 0              | -2.081281               | -0.704188 | 1.175469  |
| 12               | 6                | 0              | -1.895611               | -1.810627 | -0.704372 |
| 13               | 1                | 0              | -2.732190               | -2.472182 | -0.459345 |
| 14               | 1                | 0              | -2.283652               | -1.020960 | -1.356081 |
| 15               | 1                | 0              | -1.166124               | -2.401863 | -1.267689 |
| 16               | 6                | 0              | 1.842055                | -0.796656 | 0.243712  |
| 17               | 1                | 0              | 2.063091                | -1.057599 | 1.294847  |
| 18               | 1                | 0              | 1.788699                | -1.774675 | -0.261197 |
| 19               | 6                | 0              | 2.964774                | 0.080577  | -0.345895 |
| 20               | 1                | 0              | 3.921645                | -0.443647 | -0.264831 |
| 21               | 1                | 0              | 2.798498                | 0.298058  | -1.405676 |
| 22               | 1                | 0              | 3.065990                | 1.031063  | 0.187399  |

-----

## 5.log

SCF Done: E(RB3LYP) = -854.545562310 A.U. after 1 cycles

Zero-point correction= 0.198879  
(Hartree/Particle)  
Thermal correction to Energy= 0.213717  
Thermal correction to Enthalpy= 0.214662  
Thermal correction to Gibbs Free Energy= 0.154358  
Sum of electronic and zero-point Energies= -854.346683  
Sum of electronic and thermal Energies= -854.331845  
Sum of electronic and thermal Enthalpies= -854.330901  
Sum of electronic and thermal Free Energies= -854.391204

|       | E (Thermal) | CV             | S              |
|-------|-------------|----------------|----------------|
|       | KCal/Mol    | Cal/Mol-Kelvin | Cal/Mol-Kelvin |
| Total | 134.110     | 50.882         | 126.919        |

| Center<br>Number | Atomic<br>Number | Atomic<br>Type | Coordinates (Angstroms) |           |           |
|------------------|------------------|----------------|-------------------------|-----------|-----------|
|                  |                  |                | X                       | Y         | Z         |
| 1                | 14               | 0              | 0.356711                | -1.410016 | 0.000000  |
| 2                | 8                | 0              | -0.141401               | 0.171511  | 0.000000  |
| 3                | 14               | 0              | -0.826441               | 1.672399  | -0.000000 |
| 4                | 6                | 0              | 2.243514                | -1.431651 | -0.000000 |
| 5                | 1                | 0              | 2.645890                | -0.924217 | 0.885865  |
| 6                | 1                | 0              | 2.631399                | -2.458927 | -0.000000 |
| 7                | 1                | 0              | 2.645890                | -0.924217 | -0.885865 |
| 8                | 6                | 0              | -0.310048               | -2.258147 | 1.548871  |
| 9                | 1                | 0              | 0.056173                | -1.767199 | 2.459426  |
| 10               | 1                | 0              | -1.406844               | -2.232238 | 1.574634  |
| 11               | 1                | 0              | -0.001443               | -3.311098 | 1.592025  |
| 12               | 6                | 0              | -0.310048               | -2.258147 | -1.548871 |
| 13               | 1                | 0              | 0.056173                | -1.767199 | -2.459426 |
| 14               | 1                | 0              | -0.001443               | -3.311098 | -1.592025 |
| 15               | 1                | 0              | -1.406844               | -2.232238 | -1.574634 |
| 16               | 6                | 0              | -0.310048               | 2.604196  | -1.553685 |
| 17               | 1                | 0              | 0.777404                | 2.747437  | -1.589412 |
| 18               | 1                | 0              | -0.606899               | 2.059738  | -2.458442 |
| 19               | 1                | 0              | -0.780458               | 3.595674  | -1.591782 |
| 20               | 6                | 0              | -0.310048               | 2.604196  | 1.553685  |
| 21               | 1                | 0              | -0.606899               | 2.059738  | 2.458442  |
| 22               | 1                | 0              | 0.777404                | 2.747437  | 1.589412  |
| 23               | 1                | 0              | -0.780458               | 3.595674  | 1.591782  |
| 24               | 1                | 0              | -2.311558               | 1.514608  | 0.000000  |

5+.log

SCF Done: E(RB3LYP) = -853.679387268 A.U. after 8 cycles

Zero-point correction= 0.190571  
 (Hartree/Particle)  
 Thermal correction to Energy= 0.205478  
 Thermal correction to Enthalpy= 0.206422  
 Thermal correction to Gibbs Free Energy= 0.146244  
 Sum of electronic and zero-point Energies= -853.488816  
 Sum of electronic and thermal Energies= -853.473909  
 Sum of electronic and thermal Enthalpies= -853.472965  
 Sum of electronic and thermal Free Energies= -853.533144

|       | E (Thermal) | CV             | S              |
|-------|-------------|----------------|----------------|
|       | KCal/Mol    | Cal/Mol-Kelvin | Cal/Mol-Kelvin |
| Total | 128.939     | 49.491         | 126.656        |

| Center<br>Number | Atomic<br>Number | Atomic<br>Type | Coordinates (Angstroms) |           |           |
|------------------|------------------|----------------|-------------------------|-----------|-----------|
|                  |                  |                | X                       | Y         | Z         |
| 1                | 14               | 0              | 1.532606                | -0.002314 | -0.000116 |
| 2                | 8                | 0              | -0.229322               | -0.020648 | 0.002338  |
| 3                | 14               | 0              | -1.799214               | 0.001076  | 0.000115  |
| 4                | 6                | 0              | 2.008933                | -1.093532 | -1.442881 |
| 5                | 1                | 0              | 1.629628                | -0.703554 | -2.394955 |
| 6                | 1                | 0              | 3.102060                | -1.146537 | -1.527682 |
| 7                | 1                | 0              | 1.642324                | -2.119376 | -1.319537 |
| 8                | 6                | 0              | 2.010502                | 1.791986  | -0.226040 |
| 9                | 1                | 0              | 1.640632                | 2.199382  | -1.174567 |
| 10               | 1                | 0              | 1.636724                | 2.422400  | 0.589583  |
| 11               | 1                | 0              | 3.103688                | 1.891267  | -0.236544 |
| 12               | 6                | 0              | 2.002570                | -0.700879 | 1.670546  |
| 13               | 1                | 0              | 1.636231                | -1.725454 | 1.804762  |
| 14               | 1                | 0              | 3.095386                | -0.730799 | 1.769449  |
| 15               | 1                | 0              | 1.620116                | -0.086526 | 2.494331  |
| 16               | 6                | 0              | -2.712600               | -1.601849 | 0.004314  |
| 17               | 1                | 0              | -2.126668               | -2.392449 | 0.483751  |
| 18               | 1                | 0              | -3.682577               | -1.502946 | 0.504863  |
| 19               | 1                | 0              | -2.908867               | -1.913041 | -1.032521 |
| 20               | 6                | 0              | -2.678255               | 1.623206  | -0.007314 |
| 21               | 1                | 0              | -2.973308               | 1.884470  | 1.019835  |
| 22               | 1                | 0              | -2.037526               | 2.423954  | -0.388829 |
| 23               | 1                | 0              | -3.597650               | 1.568128  | -0.602379 |

-----  
**TMS.log**

SCF Done: E(RB3LYP) = -409.871433213 A.U. after 1 cycles

Zero-point correction= 0.119326  
(Hartree/Particle)  
Thermal correction to Energy= 0.126836  
Thermal correction to Enthalpy= 0.127780  
Thermal correction to Gibbs Free Energy= 0.089999  
Sum of electronic and zero-point Energies= -409.752107  
Sum of electronic and thermal Energies= -409.744598  
Sum of electronic and thermal Enthalpies= -409.743653  
Sum of electronic and thermal Free Energies= -409.781434

|       | E (Thermal)<br>KCal/Mol | CV<br>Cal/Mol-Kelvin | S<br>Cal/Mol-Kelvin |
|-------|-------------------------|----------------------|---------------------|
| Total | 79.591                  | 26.012               | 79.517              |

-----

| Center<br>Number | Atomic<br>Number | Atomic<br>Type | Coordinates (Angstroms) |           |           |
|------------------|------------------|----------------|-------------------------|-----------|-----------|
|                  |                  |                | X                       | Y         | Z         |
| 1                | 14               | 0              | -0.000000               | -0.000000 | 0.377131  |
| 2                | 1                | 0              | -0.000000               | -0.000000 | 1.872092  |
| 3                | 6                | 0              | -0.000000               | 1.796272  | -0.222767 |
| 4                | 1                | 0              | -0.885135               | 2.336381  | 0.135923  |
| 5                | 1                | 0              | 0.885135                | 2.336381  | 0.135923  |
| 6                | 1                | 0              | -0.000000               | 1.850016  | -1.319219 |
| 7                | 6                | 0              | -1.555617               | -0.898136 | -0.222767 |
| 8                | 1                | 0              | -2.465933               | -0.401641 | 0.135923  |
| 9                | 1                | 0              | -1.602161               | -0.925008 | -1.319219 |
| 10               | 1                | 0              | -1.580797               | -1.934740 | 0.135923  |
| 11               | 6                | 0              | 1.555617                | -0.898136 | -0.222767 |
| 12               | 1                | 0              | 2.465933                | -0.401641 | 0.135923  |
| 13               | 1                | 0              | 1.580797                | -1.934740 | 0.135923  |
| 14               | 1                | 0              | 1.602161                | -0.925008 | -1.319219 |

-----

**TMS+.log**

SCF Done: E(RB3LYP) = -408.985707873 A.U. after 6 cycles

```

Zero-point correction=                0.109742
(Hartree/Particle)
Thermal correction to Energy=         0.117608
Thermal correction to Enthalpy=       0.118552
Thermal correction to Gibbs Free Energy= 0.077038
Sum of electronic and zero-point Energies= -408.875966
Sum of electronic and thermal Energies= -408.868100
Sum of electronic and thermal Enthalpies= -408.867156
Sum of electronic and thermal Free Energies= -408.908670

```

|       | E (Thermal) | CV             | S              |
|-------|-------------|----------------|----------------|
|       | KCal/Mol    | Cal/Mol-Kelvin | Cal/Mol-Kelvin |
| Total | 73.800      | 24.847         | 87.373         |

```

-----
Center      Atomic      Atomic      Coordinates (Angstroms)
Number      Number      Type        X           Y           Z
-----
   1         14         0         -0.000018    0.000001    0.000000
   2          6         0          0.881365    1.619608    0.000000
   3          1         0          1.969886    1.511843    0.000005
   4          1         0          0.581463    2.210864   -0.878113
   5          1         0          0.581454    2.210870    0.878106
   6          6         0         -1.843323   -0.046539    0.000000
   7          1         0         -2.294288    0.950016    0.000013
   8          1         0         -2.205393   -0.601902   -0.878113
   9          1         0         -2.205394   -0.601926    0.878098
  10          6         0          0.961973   -1.573071   -0.000000
  11          1         0          0.324479   -2.461942   -0.000012
  12          1         0          1.623988   -1.608905   -0.878100
  13          1         0          1.623968   -1.608916    0.878115
-----

```

## H-.log

SCF Done: E(RB3LYP) = -0.461816668117 A.U. after 1 cycles

```

Zero-point correction=                0.000000
(Hartree/Particle)
Thermal correction to Energy=         0.001416
Thermal correction to Enthalpy=       0.002360
Thermal correction to Gibbs Free Energy= -0.010000
Sum of electronic and zero-point Energies= -0.461817
Sum of electronic and thermal Energies= -0.460400
Sum of electronic and thermal Enthalpies= -0.459456
Sum of electronic and thermal Free Energies= -0.471816

```

|       | E (Thermal)<br>KCal/Mol | CV<br>Cal/Mol-Kelvin | S<br>Cal/Mol-Kelvin |
|-------|-------------------------|----------------------|---------------------|
| Total | 0.889                   | 2.981                | 26.014              |

## H2.log

SCF Done: E(RB3LYP) = -1.17548240892 A.U. after 1 cycles

|                                              |           |
|----------------------------------------------|-----------|
| Zero-point correction=                       | 0.010145  |
| (Hartree/Particle)                           |           |
| Thermal correction to Energy=                | 0.012505  |
| Thermal correction to Enthalpy=              | 0.013450  |
| Thermal correction to Gibbs Free Energy=     | -0.001342 |
| Sum of electronic and zero-point Energies=   | -1.165337 |
| Sum of electronic and thermal Energies=      | -1.162977 |
| Sum of electronic and thermal Enthalpies=    | -1.162033 |
| Sum of electronic and thermal Free Energies= | -1.176825 |

|       | E (Thermal)<br>KCal/Mol | CV<br>Cal/Mol-Kelvin | S<br>Cal/Mol-Kelvin |
|-------|-------------------------|----------------------|---------------------|
| Total | 7.847                   | 4.968                | 31.132              |

| Center<br>Number | Atomic<br>Number | Atomic<br>Type | Coordinates (Angstroms) |          |           |
|------------------|------------------|----------------|-------------------------|----------|-----------|
|                  |                  |                | X                       | Y        | Z         |
| 1                | 1                | 0              | 0.000000                | 0.000000 | 0.371394  |
| 2                | 1                | 0              | 0.000000                | 0.000000 | -0.371394 |

## toluene.log

SCF Done: E(RB3LYP) = -271.577271836 A.U. after 1 cycles

|                                              |             |
|----------------------------------------------|-------------|
| Zero-point correction=                       | 0.127991    |
| (Hartree/Particle)                           |             |
| Thermal correction to Energy=                | 0.134225    |
| Thermal correction to Enthalpy=              | 0.135169    |
| Thermal correction to Gibbs Free Energy=     | 0.097145    |
| Sum of electronic and zero-point Energies=   | -271.449281 |
| Sum of electronic and thermal Energies=      | -271.443047 |
| Sum of electronic and thermal Enthalpies=    | -271.442102 |
| Sum of electronic and thermal Free Energies= | -271.480127 |

|       |             |                |                |
|-------|-------------|----------------|----------------|
|       | E (Thermal) | CV             | S              |
|       | KCal/Mol    | Cal/Mol-Kelvin | Cal/Mol-Kelvin |
| Total | 84.228      | 23.222         | 80.029         |

```

-----
Center   Atomic   Atomic   Coordinates (Angstroms)
Number   Number   Type      X           Y           Z
-----
  1         6         0         1.202687   -1.206749   0.002100
  2         6         0        -0.194899   -1.203491  -0.009423
  3         6         0        -0.915815   0.000000   -0.011992
  4         6         0        -0.194899   1.203491   -0.009423
  5         6         0         1.202687   1.206749   0.002100
  6         6         0         1.907831   0.000000   0.008939
  7         1         0         1.740189   -2.152168   0.001925
  8         1         0        -0.734196   -2.149012  -0.018569
  9         1         0        -0.734196   2.149012   -0.018569
 10        1         0         1.740189   2.152168   0.001925
 11        1         0         2.994993   0.000000   0.015011
 12        6         0        -2.428193   0.000000   0.009999
 13        1         0        -2.809163   0.000000   1.040642
 14        1         0        -2.837110   0.886387   -0.488087
 15        1         0        -2.837110  -0.886387   -0.488087
-----

```

**benzyl-cation.log**

SCF Done: E(RB3LYP) = -270.666649192 A.U. after 1 cycles

```

Zero-point correction= 0.117421
(Hartree/Particle)
Thermal correction to Energy= 0.123067
Thermal correction to Enthalpy= 0.124011
Thermal correction to Gibbs Free Energy= 0.088272
Sum of electronic and zero-point Energies= -270.549228
Sum of electronic and thermal Energies= -270.543583
Sum of electronic and thermal Enthalpies= -270.542638
Sum of electronic and thermal Free Energies= -270.578378

```

|       |             |                |                |
|-------|-------------|----------------|----------------|
|       | E (Thermal) | CV             | S              |
|       | KCal/Mol    | Cal/Mol-Kelvin | Cal/Mol-Kelvin |
| Total | 77.226      | 22.070         | 75.220         |

```

-----
Center   Atomic   Atomic   Coordinates (Angstroms)
Number   Number   Type      X           Y           Z
-----

```



|    |   |   |           |           |           |
|----|---|---|-----------|-----------|-----------|
| 1  | 6 | 0 | 0.000040  | -1.122467 | 1.236221  |
| 2  | 6 | 0 | -0.000041 | -1.804513 | -0.000000 |
| 3  | 6 | 0 | 0.000040  | -1.122467 | -1.236221 |
| 4  | 6 | 0 | 0.000040  | 0.254593  | -1.246704 |
| 5  | 6 | 0 | 0.000032  | 0.983959  | 0.000000  |
| 6  | 6 | 0 | 0.000040  | 0.254593  | 1.246704  |
| 7  | 1 | 0 | 0.000066  | -1.684936 | 2.164267  |
| 8  | 1 | 0 | -0.000215 | -2.891872 | -0.000000 |
| 9  | 1 | 0 | 0.000007  | 0.807271  | -2.182219 |
| 10 | 1 | 0 | 0.000007  | 0.807271  | 2.182219  |
| 11 | 1 | 0 | 0.000066  | -1.684936 | -2.164267 |
| 12 | 6 | 0 | -0.000090 | 2.355744  | 0.000000  |
| 13 | 1 | 0 | -0.000153 | 2.925277  | -0.926996 |
| 14 | 1 | 0 | -0.000153 | 2.925277  | 0.926996  |

## benzene.log

SCF Done: E(RB3LYP) = -232.258922022 A.U. after 1 cycles

Zero-point correction= 0.100550  
(Hartree/Particle)  
Thermal correction to Energy= 0.104947  
Thermal correction to Enthalpy= 0.105891  
Thermal correction to Gibbs Free Energy= 0.073079  
Sum of electronic and zero-point Energies= -232.158372  
Sum of electronic and thermal Energies= -232.153975  
Sum of electronic and thermal Enthalpies= -232.153031  
Sum of electronic and thermal Free Energies= -232.185843

|       | E (Thermal) | CV             | S              |
|-------|-------------|----------------|----------------|
|       | KCal/Mol    | Cal/Mol-Kelvin | Cal/Mol-Kelvin |
| Total | 65.855      | 17.168         | 69.059         |

| Center<br>Number | Atomic<br>Number | Atomic<br>Type | Coordinates (Angstroms) |           |           |
|------------------|------------------|----------------|-------------------------|-----------|-----------|
|                  |                  |                | X                       | Y         | Z         |
| 1                | 6                | 0              | -1.255077               | 0.617277  | 0.000000  |
| 2                | 6                | 0              | -1.162116               | -0.778283 | 0.000000  |
| 3                | 6                | 0              | 0.092957                | -1.395552 | -0.000000 |
| 4                | 6                | 0              | 1.255077                | -0.617277 | -0.000000 |
| 5                | 6                | 0              | 1.162116                | 0.778283  | -0.000000 |
| 6                | 6                | 0              | -0.092957               | 1.395552  | 0.000000  |
| 7                | 1                | 0              | -2.230858               | 1.097193  | -0.000001 |
| 8                | 1                | 0              | -2.065622               | -1.383384 | -0.000000 |

|    |   |   |           |           |           |
|----|---|---|-----------|-----------|-----------|
| 9  | 1 | 0 | 2.230858  | -1.097193 | 0.000000  |
| 10 | 1 | 0 | 2.065622  | 1.383384  | 0.000000  |
| 11 | 1 | 0 | -0.165229 | 2.480561  | -0.000000 |
| 12 | 1 | 0 | 0.165229  | -2.480561 | -0.000000 |

**o-tolCH2+.log**

SCF Done: E(RB3LYP) = -309.990897173 A.U. after 1 cycles

Zero-point correction= 0.145086  
(Hartree/Particle)  
Thermal correction to Energy= 0.152399  
Thermal correction to Enthalpy= 0.153343  
Thermal correction to Gibbs Free Energy= 0.113677  
Sum of electronic and zero-point Energies= -309.845811  
Sum of electronic and thermal Energies= -309.838498  
Sum of electronic and thermal Enthalpies= -309.837554  
Sum of electronic and thermal Free Energies= -309.877221

|       | E (Thermal) | CV             | S              |
|-------|-------------|----------------|----------------|
|       | KCal/Mol    | Cal/Mol-Kelvin | Cal/Mol-Kelvin |
| Total | 95.632      | 28.046         | 83.485         |

| Center<br>Number | Atomic<br>Number | Atomic<br>Type | Coordinates (Angstroms) |           |           |
|------------------|------------------|----------------|-------------------------|-----------|-----------|
|                  |                  |                | X                       | Y         | Z         |
| 1                | 6                | 0              | 1.715761                | -1.010720 | -0.000191 |
| 2                | 6                | 0              | 0.389335                | -1.474083 | -0.000307 |
| 3                | 6                | 0              | -0.681934               | -0.592116 | 0.000012  |
| 4                | 6                | 0              | -0.371017               | 0.837336  | 0.000139  |
| 5                | 6                | 0              | 1.010419                | 1.276891  | 0.000312  |
| 6                | 6                | 0              | 2.035837                | 0.365681  | 0.000136  |
| 7                | 1                | 0              | 2.522680                | -1.739727 | -0.000310 |
| 8                | 1                | 0              | 0.204244                | -2.543878 | -0.000540 |
| 9                | 1                | 0              | 1.212869                | 2.344469  | 0.000536  |
| 10               | 1                | 0              | 3.072363                | 0.686183  | 0.000229  |
| 11               | 6                | 0              | -2.094267               | -1.098911 | 0.000330  |
| 12               | 1                | 0              | -2.644913               | -0.755928 | 0.885101  |
| 13               | 1                | 0              | -2.645337               | -0.756347 | -0.884361 |
| 14               | 1                | 0              | -2.112338               | -2.190823 | 0.000504  |
| 15               | 6                | 0              | -1.353075               | 1.790258  | -0.000398 |
| 16               | 1                | 0              | -1.105655               | 2.849290  | -0.000531 |
| 17               | 1                | 0              | -2.410270               | 1.540747  | -0.000833 |

**m-tolCH2+.log**

SCF Done: E(RB3LYP) = -309.990257688 A.U. after 1 cycles

Zero-point correction= 0.144934  
(Hartree/Particle)  
Thermal correction to Energy= 0.152338  
Thermal correction to Enthalpy= 0.153282  
Thermal correction to Gibbs Free Energy= 0.113330  
Sum of electronic and zero-point Energies= -309.845324  
Sum of electronic and thermal Energies= -309.837920  
Sum of electronic and thermal Enthalpies= -309.836975  
Sum of electronic and thermal Free Energies= -309.876928

|       | E (Thermal) | CV             | S              |
|-------|-------------|----------------|----------------|
|       | KCal/Mol    | Cal/Mol-Kelvin | Cal/Mol-Kelvin |
| Total | 95.594      | 28.163         | 84.086         |

| Center<br>Number | Atomic<br>Number | Atomic<br>Type | Coordinates (Angstroms) |           |           |
|------------------|------------------|----------------|-------------------------|-----------|-----------|
|                  |                  |                | X                       | Y         | Z         |
| 1                | 6                | 0              | 1.258948                | -0.410608 | -0.000041 |
| 2                | 6                | 0              | -0.053389               | -1.012099 | -0.000032 |
| 3                | 6                | 0              | -1.196707               | -0.235415 | -0.000022 |
| 4                | 6                | 0              | -1.018900               | 1.173936  | 0.000052  |
| 5                | 6                | 0              | 0.244026                | 1.800520  | 0.000025  |
| 6                | 6                | 0              | 1.382835                | 1.026753  | -0.000068 |
| 7                | 1                | 0              | -0.125644               | -2.096836 | 0.000009  |
| 8                | 1                | 0              | -1.906707               | 1.803700  | 0.000125  |
| 9                | 1                | 0              | 0.307073                | 2.883986  | 0.000081  |
| 10               | 1                | 0              | 2.371402                | 1.477124  | -0.000193 |
| 11               | 6                | 0              | -2.582533               | -0.827589 | -0.000011 |
| 12               | 1                | 0              | -3.144768               | -0.503935 | 0.883655  |
| 13               | 1                | 0              | -3.145253               | -0.502820 | -0.882959 |
| 14               | 1                | 0              | -2.551500               | -1.920108 | -0.000718 |
| 15               | 6                | 0              | 2.382111                | -1.197613 | 0.000074  |
| 16               | 1                | 0              | 2.316893                | -2.283549 | 0.000101  |
| 17               | 1                | 0              | 3.380162                | -0.764885 | 0.000036  |

**p-tolCH2+.log**

SCF Done: E(RB3LYP) = -309.996515845 A.U. after 8 cycles

Zero-point correction= 0.144644  
 (Hartree/Particle)  
 Thermal correction to Energy= 0.152141  
 Thermal correction to Enthalpy= 0.153085  
 Thermal correction to Gibbs Free Energy= 0.112247  
 Sum of electronic and zero-point Energies= -309.851872  
 Sum of electronic and thermal Energies= -309.844375  
 Sum of electronic and thermal Enthalpies= -309.843430  
 Sum of electronic and thermal Free Energies= -309.884269

|       | E (Thermal)<br>KCal/Mol | CV<br>Cal/Mol-Kelvin | S<br>Cal/Mol-Kelvin |
|-------|-------------------------|----------------------|---------------------|
| Total | 95.470                  | 28.118               | 85.951              |

| Center<br>Number | Atomic<br>Number | Atomic<br>Type | Coordinates (Angstroms) |           |           |
|------------------|------------------|----------------|-------------------------|-----------|-----------|
|                  |                  |                | X                       | Y         | Z         |
| 1                | 6                | 0              | -1.487529               | -0.000001 | 0.001684  |
| 2                | 6                | 0              | -0.748857               | -1.242062 | -0.002274 |
| 3                | 6                | 0              | 0.622569                | -1.230905 | -0.010977 |
| 4                | 6                | 0              | 1.337804                | 0.000002  | -0.013971 |
| 5                | 6                | 0              | 0.622567                | 1.230907  | -0.010976 |
| 6                | 6                | 0              | -0.748859               | 1.242062  | -0.002274 |
| 7                | 1                | 0              | -1.296371               | -2.180721 | -0.000793 |
| 8                | 1                | 0              | 1.177739                | 2.164186  | -0.017470 |
| 9                | 1                | 0              | -1.296375               | 2.180720  | -0.000794 |
| 10               | 6                | 0              | -2.856056               | -0.000002 | 0.009861  |
| 11               | 1                | 0              | -3.425344               | -0.926753 | 0.013682  |
| 12               | 1                | 0              | -3.425345               | 0.926750  | 0.013681  |
| 13               | 6                | 0              | 2.829159                | 0.000000  | 0.008342  |
| 14               | 1                | 0              | 3.169439                | -0.000067 | 1.057074  |
| 15               | 1                | 0              | 3.246866                | -0.894731 | -0.462252 |
| 16               | 1                | 0              | 3.246871                | 0.894783  | -0.462146 |
| 17               | 1                | 0              | 1.177743                | -2.164182 | -0.017470 |

**o-CH3Ph2CH+.log**

SCF Done: E(RB3LYP) = -541.083946233 A.U. after 1 cycles

Zero-point correction= 0.227436  
 (Hartree/Particle)  
 Thermal correction to Energy= 0.239069  
 Thermal correction to Enthalpy= 0.240013  
 Thermal correction to Gibbs Free Energy= 0.189196

Sum of electronic and zero-point Energies= -540.856511  
 Sum of electronic and thermal Energies= -540.844877  
 Sum of electronic and thermal Enthalpies= -540.843933  
 Sum of electronic and thermal Free Energies= -540.894751

|       | E (Thermal)<br>KCal/Mol | CV<br>Cal/Mol-Kelvin | S<br>Cal/Mol-Kelvin |
|-------|-------------------------|----------------------|---------------------|
| Total | 150.018                 | 46.176               | 106.955             |

| Center<br>Number | Atomic<br>Number | Atomic<br>Type | Coordinates (Angstroms) |           |           |
|------------------|------------------|----------------|-------------------------|-----------|-----------|
|                  |                  |                | X                       | Y         | Z         |
| 1                | 6                | 0              | 2.411544                | -1.943053 | 0.391149  |
| 2                | 6                | 0              | 1.199617                | -1.281891 | 0.398762  |
| 3                | 6                | 0              | 1.121709                | 0.119190  | 0.118854  |
| 4                | 6                | 0              | 2.336806                | 0.858119  | -0.133159 |
| 5                | 6                | 0              | 3.537523                | 0.151166  | -0.155848 |
| 6                | 6                | 0              | 3.582314                | -1.224427 | 0.097213  |
| 7                | 1                | 0              | 2.462967                | -2.999953 | 0.632704  |
| 8                | 1                | 0              | 0.303116                | -1.813451 | 0.696090  |
| 9                | 1                | 0              | 4.461008                | 0.681800  | -0.367968 |
| 10               | 1                | 0              | 4.540607                | -1.736745 | 0.087569  |
| 11               | 6                | 0              | -0.111274               | 0.811095  | 0.147669  |
| 12               | 1                | 0              | -0.039456               | 1.888514  | 0.286532  |
| 13               | 6                | 0              | -1.444914               | 0.333001  | 0.030314  |
| 14               | 6                | 0              | -2.488059               | 1.193847  | 0.484577  |
| 15               | 6                | 0              | -1.800078               | -0.919405 | -0.551903 |
| 16               | 6                | 0              | -3.812102               | 0.787434  | 0.438052  |
| 17               | 1                | 0              | -2.231254               | 2.165477  | 0.898508  |
| 18               | 6                | 0              | -3.129010               | -1.304051 | -0.619626 |
| 19               | 1                | 0              | -1.037288               | -1.543468 | -1.003554 |
| 20               | 6                | 0              | -4.133121               | -0.462768 | -0.110920 |
| 21               | 1                | 0              | -4.597249               | 1.438349  | 0.809624  |
| 22               | 1                | 0              | -3.397948               | -2.247605 | -1.084372 |
| 23               | 1                | 0              | -5.172621               | -0.773700 | -0.168053 |
| 24               | 6                | 0              | 2.339771                | 2.339007  | -0.419399 |
| 25               | 1                | 0              | 1.780189                | 2.582819  | -1.330046 |
| 26               | 1                | 0              | 1.901106                | 2.916299  | 0.404682  |
| 27               | 1                | 0              | 3.362476                | 2.698081  | -0.556128 |

**m-CH3Ph2CH+ .log**

SCF Done: E(RB3LYP) = -541.086037911 A.U. after 1 cycles

Zero-point correction= 0.227118  
 (Hartree/Particle)  
 Thermal correction to Energy= 0.238967  
 Thermal correction to Enthalpy= 0.239912  
 Thermal correction to Gibbs Free Energy= 0.188147  
 Sum of electronic and zero-point Energies= -540.858920  
 Sum of electronic and thermal Energies= -540.847071  
 Sum of electronic and thermal Enthalpies= -540.846126  
 Sum of electronic and thermal Free Energies= -540.897891

|       | E (Thermal) | CV             | S              |
|-------|-------------|----------------|----------------|
|       | KCal/Mol    | Cal/Mol-Kelvin | Cal/Mol-Kelvin |
| Total | 149.954     | 46.365         | 108.947        |

| Center<br>Number | Atomic<br>Number | Atomic<br>Type | Coordinates (Angstroms) |           |           |
|------------------|------------------|----------------|-------------------------|-----------|-----------|
|                  |                  |                | X                       | Y         | Z         |
| 1                | 6                | 0              | 2.273260                | -1.800078 | 0.427559  |
| 2                | 6                | 0              | 1.019427                | -1.213628 | 0.424208  |
| 3                | 6                | 0              | 0.894821                | 0.176413  | 0.134719  |
| 4                | 6                | 0              | 2.080734                | 0.939023  | -0.095749 |
| 5                | 6                | 0              | 3.339765                | 0.351158  | -0.121278 |
| 6                | 6                | 0              | 3.413541                | -1.032505 | 0.142992  |
| 7                | 1                | 0              | 2.381066                | -2.852856 | 0.670025  |
| 8                | 1                | 0              | 0.150871                | -1.795310 | 0.708857  |
| 9                | 1                | 0              | 4.388356                | -1.515101 | 0.151749  |
| 10               | 6                | 0              | -0.335698               | 0.877429  | 0.097398  |
| 11               | 1                | 0              | -0.236811               | 1.961653  | 0.161651  |
| 12               | 6                | 0              | -1.675543               | 0.420225  | -0.008370 |
| 13               | 6                | 0              | -2.705019               | 1.346500  | 0.336793  |
| 14               | 6                | 0              | -2.051736               | -0.876171 | -0.468803 |
| 15               | 6                | 0              | -4.038053               | 0.969468  | 0.301698  |
| 16               | 1                | 0              | -2.430894               | 2.347868  | 0.658259  |
| 17               | 6                | 0              | -3.388120               | -1.234056 | -0.525135 |
| 18               | 1                | 0              | -1.298054               | -1.561486 | -0.838531 |
| 19               | 6                | 0              | -4.380150               | -0.321588 | -0.125903 |
| 20               | 1                | 0              | -4.813094               | 1.672871  | 0.589254  |
| 21               | 1                | 0              | -3.672604               | -2.213551 | -0.896916 |
| 22               | 1                | 0              | -5.425907               | -0.612529 | -0.173546 |
| 23               | 6                | 0              | 4.588580                | 1.148902  | -0.404540 |
| 24               | 1                | 0              | 4.368917                | 2.214594  | -0.513328 |
| 25               | 1                | 0              | 5.320035                | 1.034003  | 0.403506  |
| 26               | 1                | 0              | 5.068387                | 0.807623  | -1.329573 |
| 27               | 1                | 0              | 1.984882                | 2.005666  | -0.284949 |

**p-CH3Ph2CH+.log**

SCF Done: E(RB3LYP) = -541.089569583 A.U. after 1 cycles

Zero-point correction= 0.226915  
 (Hartree/Particle)  
 Thermal correction to Energy= 0.238868  
 Thermal correction to Enthalpy= 0.239813  
 Thermal correction to Gibbs Free Energy= 0.186578  
 Sum of electronic and zero-point Energies= -540.862654  
 Sum of electronic and thermal Energies= -540.850701  
 Sum of electronic and thermal Enthalpies= -540.849757  
 Sum of electronic and thermal Free Energies= -540.902992

|       | E (Thermal)<br>KCal/Mol | CV<br>Cal/Mol-Kelvin | S<br>Cal/Mol-Kelvin |
|-------|-------------------------|----------------------|---------------------|
| Total | 149.892                 | 46.343               | 112.042             |

| Center<br>Number | Atomic<br>Number | Atomic<br>Type | Coordinates (Angstroms) |           |           |
|------------------|------------------|----------------|-------------------------|-----------|-----------|
|                  |                  |                | X                       | Y         | Z         |
| 1                | 6                | 0              | -2.479399               | 1.166690  | 0.370840  |
| 2                | 6                | 0              | -1.157458               | 0.775467  | 0.368871  |
| 3                | 6                | 0              | -0.799482               | -0.563981 | 0.020467  |
| 4                | 6                | 0              | -1.855626               | -1.481724 | -0.268957 |
| 5                | 6                | 0              | -3.174308               | -1.068542 | -0.287814 |
| 6                | 6                | 0              | -3.515809               | 0.263082  | 0.027058  |
| 7                | 1                | 0              | -2.738222               | 2.181661  | 0.660433  |
| 8                | 1                | 0              | -0.396296               | 1.473967  | 0.695930  |
| 9                | 6                | 0              | 0.520497                | -1.063541 | -0.023864 |
| 10               | 1                | 0              | 0.586689                | -2.151947 | -0.041301 |
| 11               | 6                | 0              | 1.781422                | -0.405128 | -0.045951 |
| 12               | 6                | 0              | 2.926415                | -1.191555 | 0.276466  |
| 13               | 6                | 0              | 1.973626                | 0.960918  | -0.403188 |
| 14               | 6                | 0              | 4.189756                | -0.621990 | 0.317378  |
| 15               | 1                | 0              | 2.796104                | -2.242843 | 0.519545  |
| 16               | 6                | 0              | 3.243352                | 1.514212  | -0.384915 |
| 17               | 1                | 0              | 1.138014                | 1.554806  | -0.754440 |
| 18               | 6                | 0              | 4.348831                | 0.731817  | -0.009852 |
| 19               | 1                | 0              | 5.051877                | -1.223853 | 0.587055  |
| 20               | 1                | 0              | 3.388234                | 2.549126  | -0.679203 |
| 21               | 1                | 0              | 5.340466                | 1.175587  | 0.002428  |
| 22               | 1                | 0              | -1.609115               | -2.513361 | -0.506536 |
| 23               | 1                | 0              | -3.959103               | -1.777358 | -0.535027 |
| 24               | 6                | 0              | -4.944230               | 0.719385  | 0.032530  |
| 25               | 1                | 0              | -5.632325               | -0.079751 | -0.252995 |
| 26               | 1                | 0              | -5.229416               | 1.082490  | 1.028646  |
| 27               | 1                | 0              | -5.082426               | 1.560815  | -0.658954 |

## C6F5H.log

SCF Done: E(RB3LYP) = -728.432149873 A.U. after 1 cycles

Zero-point correction= 0.059666  
(Hartree/Particle)  
Thermal correction to Energy= 0.068339  
Thermal correction to Enthalpy= 0.069283  
Thermal correction to Gibbs Free Energy= 0.025755  
Sum of electronic and zero-point Energies= -728.372484  
Sum of electronic and thermal Energies= -728.363811  
Sum of electronic and thermal Enthalpies= -728.362866  
Sum of electronic and thermal Free Energies= -728.406395

|       | E (Thermal) | CV             | S              |
|-------|-------------|----------------|----------------|
|       | KCal/Mol    | Cal/Mol-Kelvin | Cal/Mol-Kelvin |
| Total | 42.883      | 32.079         | 91.613         |

| Center<br>Number | Atomic<br>Number | Atomic<br>Type | Coordinates (Angstroms) |           |           |
|------------------|------------------|----------------|-------------------------|-----------|-----------|
|                  |                  |                | X                       | Y         | Z         |
| 1                | 6                | 0              | -1.209735               | 0.425213  | 0.000024  |
| 2                | 6                | 0              | -1.194163               | -0.968250 | 0.000050  |
| 3                | 6                | 0              | -0.000020               | -1.679282 | 0.000003  |
| 4                | 6                | 0              | 1.194166                | -0.968255 | 0.000020  |
| 5                | 6                | 0              | 1.209751                | 0.425170  | 0.000036  |
| 6                | 6                | 0              | -0.000001               | 1.119302  | 0.000003  |
| 7                | 1                | 0              | 0.000008                | -2.763280 | -0.000030 |
| 8                | 9                | 0              | 2.366941                | -1.626734 | -0.000026 |
| 9                | 9                | 0              | 2.367449                | 1.100325  | -0.000005 |
| 10               | 9                | 0              | 0.000054                | 2.457178  | -0.000020 |
| 11               | 9                | 0              | -2.367461               | 1.100312  | -0.000011 |
| 12               | 9                | 0              | -2.366983               | -1.626649 | -0.000026 |

## o-CH3Ph2CHF5+.log

SCF Done: E(RB3LYP) = -1037.23124015 A.U. after 1 cycles

Zero-point correction= 0.186002  
(Hartree/Particle)  
Thermal correction to Energy= 0.202191  
Thermal correction to Enthalpy= 0.203135



Thermal correction to Gibbs Free Energy= 0.141734  
 Sum of electronic and zero-point Energies= -1037.045238  
 Sum of electronic and thermal Energies= -1037.029050  
 Sum of electronic and thermal Enthalpies= -1037.028105  
 Sum of electronic and thermal Free Energies= -1037.089506

|       | E (Thermal)<br>KCal/Mol | CV<br>Cal/Mol-Kelvin | S<br>Cal/Mol-Kelvin |
|-------|-------------------------|----------------------|---------------------|
| Total | 126.876                 | 61.111               | 129.228             |

| Center<br>Number | Atomic<br>Number | Atomic<br>Type | Coordinates (Angstroms) |           |           |
|------------------|------------------|----------------|-------------------------|-----------|-----------|
|                  |                  |                | X                       | Y         | Z         |
| 1                | 6                | 0              | -2.256674               | 1.314191  | 0.284840  |
| 2                | 6                | 0              | -0.909108               | 0.993847  | 0.290354  |
| 3                | 6                | 0              | -0.447437               | -0.326085 | 0.023719  |
| 4                | 6                | 0              | -1.458635               | -1.304334 | -0.215033 |
| 5                | 6                | 0              | -2.807359               | -0.995908 | -0.249974 |
| 6                | 6                | 0              | -3.207826               | 0.322853  | 0.001529  |
| 7                | 6                | 0              | 0.902672                | -0.789528 | 0.093701  |
| 8                | 1                | 0              | 0.964912                | -1.855198 | 0.297563  |
| 9                | 6                | 0              | 2.135490                | -0.139302 | -0.073737 |
| 10               | 6                | 0              | 3.341091                | -0.826756 | 0.354558  |
| 11               | 6                | 0              | 2.249130                | 1.122921  | -0.746945 |
| 12               | 6                | 0              | 4.562150                | -0.197327 | 0.132362  |
| 13               | 6                | 0              | 3.479719                | 1.697210  | -0.973418 |
| 14               | 1                | 0              | 1.359502                | 1.604150  | -1.132174 |
| 15               | 6                | 0              | 4.638357                | 1.040679  | -0.517227 |
| 16               | 1                | 0              | 5.476692                | -0.678966 | 0.464739  |
| 17               | 1                | 0              | 3.557709                | 2.639327  | -1.506190 |
| 18               | 1                | 0              | 5.612096                | 1.494011  | -0.683204 |
| 19               | 9                | 0              | -1.093460               | -2.563878 | -0.453147 |
| 20               | 9                | 0              | -3.715902               | -1.926550 | -0.512452 |
| 21               | 9                | 0              | -4.486821               | 0.633638  | -0.016790 |
| 22               | 9                | 0              | -2.658888               | 2.547985  | 0.565672  |
| 23               | 9                | 0              | -0.053284               | 1.953613  | 0.642271  |
| 24               | 6                | 0              | 3.308673                | -2.157512 | 1.060367  |
| 25               | 1                | 0              | 2.761222                | -2.106113 | 2.008739  |
| 26               | 1                | 0              | 2.838018                | -2.936356 | 0.446150  |
| 27               | 1                | 0              | 4.323588                | -2.493820 | 1.283827  |

**m-CH3Ph2CHF5+.log**

SCF Done: E(RB3LYP) = -1037.23314125 A.U. after 9 cycles

```

Zero-point correction=                0.185814
(Hartree/Particle)
Thermal correction to Energy=         0.202187
Thermal correction to Enthalpy=       0.203132
Thermal correction to Gibbs Free Energy= 0.140815
Sum of electronic and zero-point Energies= -1037.047327
Sum of electronic and thermal Energies= -1037.030954
Sum of electronic and thermal Enthalpies= -1037.030010
Sum of electronic and thermal Free Energies= -1037.092326

```

```

                                E (Thermal)                CV                S
                                KCal/Mol                Cal/Mol-Kelvin        Cal/Mol-Kelvin
Total                            126.875                61.247                131.156

```

| Center<br>Number | Atomic<br>Number | Atomic<br>Type | Coordinates (Angstroms) |           |           |
|------------------|------------------|----------------|-------------------------|-----------|-----------|
|                  |                  |                | X                       | Y         | Z         |
| 1                | 6                | 0              | -2.463945               | 1.265920  | 0.201544  |
| 2                | 6                | 0              | -1.109343               | 0.980502  | 0.205416  |
| 3                | 6                | 0              | -0.614847               | -0.344705 | 0.039811  |
| 4                | 6                | 0              | -1.606876               | -1.364669 | -0.099024 |
| 5                | 6                | 0              | -2.963543               | -1.093539 | -0.128643 |
| 6                | 6                | 0              | -3.394138               | 0.230850  | 0.022822  |
| 7                | 6                | 0              | 0.743507                | -0.776293 | 0.099854  |
| 8                | 1                | 0              | 0.827415                | -1.839732 | 0.315694  |
| 9                | 6                | 0              | 1.985579                | -0.136313 | -0.076827 |
| 10               | 6                | 0              | 3.138462                | -0.901969 | 0.305899  |
| 11               | 6                | 0              | 2.184517                | 1.150726  | -0.666593 |
| 12               | 6                | 0              | 4.427750                | -0.406987 | 0.179470  |
| 13               | 6                | 0              | 3.468840                | 1.633638  | -0.825964 |
| 14               | 1                | 0              | 1.345390                | 1.730902  | -1.024450 |
| 15               | 6                | 0              | 4.571185                | 0.875288  | -0.395051 |
| 16               | 1                | 0              | 3.631526                | 2.601089  | -1.290579 |
| 17               | 1                | 0              | 5.571311                | 1.283439  | -0.524308 |
| 18               | 9                | 0              | -1.218068               | -2.630514 | -0.242226 |
| 19               | 9                | 0              | -3.851956               | -2.064826 | -0.293611 |
| 20               | 9                | 0              | -4.680347               | 0.507275  | 0.006723  |
| 21               | 9                | 0              | -2.893088               | 2.508814  | 0.384174  |
| 22               | 9                | 0              | -0.274471               | 1.990149  | 0.448505  |
| 23               | 6                | 0              | 5.637258                | -1.194863 | 0.616512  |
| 24               | 1                | 0              | 6.169324                | -0.676208 | 1.422798  |
| 25               | 1                | 0              | 5.360179                | -2.187987 | 0.980360  |
| 26               | 1                | 0              | 6.343498                | -1.321407 | -0.211950 |
| 27               | 1                | 0              | 2.986288                | -1.893689 | 0.725008  |

**p-CH3Ph2CHF5+.log**

SCF Done: E(RB3LYP) = -1037.23774487 A.U. after 1 cycles

Zero-point correction= 0.185562  
 (Hartree/Particle)  
 Thermal correction to Energy= 0.202037  
 Thermal correction to Enthalpy= 0.202982  
 Thermal correction to Gibbs Free Energy= 0.139366  
 Sum of electronic and zero-point Energies= -1037.052183  
 Sum of electronic and thermal Energies= -1037.035707  
 Sum of electronic and thermal Enthalpies= -1037.034763  
 Sum of electronic and thermal Free Energies= -1037.098379

|       | E (Thermal)<br>KCal/Mol | CV<br>Cal/Mol-Kelvin | S<br>Cal/Mol-Kelvin |
|-------|-------------------------|----------------------|---------------------|
| Total | 126.780                 | 61.232               | 133.890             |

| Center<br>Number | Atomic<br>Number | Atomic<br>Type | Coordinates (Angstroms) |           |           |
|------------------|------------------|----------------|-------------------------|-----------|-----------|
|                  |                  |                | X                       | Y         | Z         |
| 1                | 6                | 0              | -2.346553               | 1.390130  | 0.133596  |
| 2                | 6                | 0              | -1.037847               | 0.944659  | 0.214904  |
| 3                | 6                | 0              | -0.699506               | -0.432712 | 0.109128  |
| 4                | 6                | 0              | -1.797803               | -1.330141 | -0.053920 |
| 5                | 6                | 0              | -3.109599               | -0.900596 | -0.159669 |
| 6                | 6                | 0              | -3.385150               | 0.469074  | -0.065423 |
| 7                | 6                | 0              | 0.596478                | -1.020130 | 0.248731  |
| 8                | 1                | 0              | 0.543468                | -2.075395 | 0.509490  |
| 9                | 6                | 0              | 1.906859                | -0.539457 | 0.101525  |
| 10               | 6                | 0              | 2.952939                | -1.421747 | 0.538072  |
| 11               | 6                | 0              | 2.293016                | 0.701348  | -0.504638 |
| 12               | 6                | 0              | 4.279536                | -1.061871 | 0.437114  |
| 13               | 6                | 0              | 3.622934                | 1.031437  | -0.625534 |
| 14               | 1                | 0              | 1.543974                | 1.370738  | -0.904959 |
| 15               | 6                | 0              | 4.646225                | 0.173014  | -0.143787 |
| 16               | 1                | 0              | 3.901084                | 1.965926  | -1.104917 |
| 17               | 9                | 0              | -1.557692               | -2.638060 | -0.144400 |
| 18               | 9                | 0              | -4.099083               | -1.765374 | -0.344862 |
| 19               | 9                | 0              | -4.627518               | 0.896230  | -0.154864 |
| 20               | 9                | 0              | -2.629386               | 2.681513  | 0.261261  |
| 21               | 9                | 0              | -0.098473               | 1.855415  | 0.474918  |
| 22               | 1                | 0              | 2.685507                | -2.381741 | 0.971740  |
| 23               | 1                | 0              | 5.052738                | -1.736112 | 0.792952  |
| 24               | 6                | 0              | 6.081961                | 0.576938  | -0.264249 |
| 25               | 1                | 0              | 6.280023                | 1.453375  | 0.369308  |
| 26               | 1                | 0              | 6.763540                | -0.222391 | 0.035269  |
| 27               | 1                | 0              | 6.318089                | 0.878407  | -1.292462 |

3+\_smd(CH2Cl2).log

SCF Done: E(RB3LYP) = -644.945666885 A.U. after 7 cycles

Zero-point correction= 0.283235  
 (Hartree/Particle)  
 Thermal correction to Energy= 0.298598  
 Thermal correction to Enthalpy= 0.299543  
 Thermal correction to Gibbs Free Energy= 0.241488  
 Sum of electronic and zero-point Energies= -644.662432  
 Sum of electronic and thermal Energies= -644.647068  
 Sum of electronic and thermal Enthalpies= -644.646124  
 Sum of electronic and thermal Free Energies= -644.704179

|       | E (Thermal) | CV             | S              |
|-------|-------------|----------------|----------------|
|       | KCal/Mol    | Cal/Mol-Kelvin | Cal/Mol-Kelvin |
| Total | 187.373     | 54.777         | 122.186        |

| Center<br>Number | Atomic<br>Number | Atomic<br>Type | Coordinates (Angstroms) |           |           |
|------------------|------------------|----------------|-------------------------|-----------|-----------|
|                  |                  |                | X                       | Y         | Z         |
| 1                | 14               | 0              | -0.138590               | -0.134962 | -0.068909 |
| 2                | 6                | 0              | 0.269293                | 1.666279  | 0.247279  |
| 3                | 1                | 0              | -0.686313               | 2.139684  | 0.509959  |
| 4                | 6                | 0              | 1.236798                | 1.805371  | 1.448685  |
| 5                | 1                | 0              | 2.214095                | 1.359243  | 1.234267  |
| 6                | 1                | 0              | 1.394052                | 2.872778  | 1.650307  |
| 7                | 1                | 0              | 0.842258                | 1.352181  | 2.365907  |
| 8                | 6                | 0              | 1.156829                | -1.447961 | -0.374698 |
| 9                | 1                | 0              | 0.679837                | -2.158766 | -1.066364 |
| 10               | 6                | 0              | 1.356688                | -2.189142 | 0.982381  |
| 11               | 1                | 0              | 2.014864                | -3.049761 | 0.808961  |
| 12               | 1                | 0              | 1.838702                | -1.548803 | 1.730140  |
| 13               | 1                | 0              | 0.420918                | -2.575001 | 1.405321  |
| 14               | 6                | 0              | -1.924295               | -0.690176 | -0.031583 |
| 15               | 1                | 0              | -1.909905               | -1.787144 | 0.017680  |
| 16               | 6                | 0              | -2.721408               | -0.135401 | 1.166274  |
| 17               | 1                | 0              | -3.753416               | -0.504729 | 1.110818  |
| 18               | 1                | 0              | -2.305003               | -0.455086 | 2.128415  |
| 19               | 1                | 0              | -2.760808               | 0.960135  | 1.156432  |
| 20               | 6                | 0              | 2.493441                | -0.976815 | -0.971000 |
| 21               | 1                | 0              | 3.000642                | -0.259885 | -0.316329 |
| 22               | 1                | 0              | 3.157432                | -1.841984 | -1.093805 |
| 23               | 1                | 0              | 2.364326                | -0.514047 | -1.955287 |
| 24               | 6                | 0              | 0.829395                | 2.368536  | -1.014216 |
| 25               | 1                | 0              | 0.140783                | 2.319650  | -1.865740 |
| 26               | 1                | 0              | 0.988255                | 3.428930  | -0.779562 |

|    |   |   |           |           |           |
|----|---|---|-----------|-----------|-----------|
| 27 | 1 | 0 | 1.791996  | 1.948064  | -1.322950 |
| 28 | 6 | 0 | -2.568804 | -0.276695 | -1.384912 |
| 29 | 1 | 0 | -2.051410 | -0.704820 | -2.252276 |
| 30 | 1 | 0 | -3.601616 | -0.647473 | -1.404933 |
| 31 | 1 | 0 | -2.607047 | 0.812313  | -1.505491 |

-----

**4+\_smd(CH2Cl2) .log**

SCF Done: E(RB3LYP) = -527.008943516 A.U. after 8 cycles

Zero-point correction= 0.197574  
(Hartree/Particle)  
Thermal correction to Energy= 0.208940  
Thermal correction to Enthalpy= 0.209884  
Thermal correction to Gibbs Free Energy= 0.159851  
Sum of electronic and zero-point Energies= -526.811369  
Sum of electronic and thermal Energies= -526.800004  
Sum of electronic and thermal Enthalpies= -526.799060  
Sum of electronic and thermal Free Energies= -526.849092

|       | E (Thermal) | CV             | S              |
|-------|-------------|----------------|----------------|
|       | KCal/Mol    | Cal/Mol-Kelvin | Cal/Mol-Kelvin |
| Total | 131.112     | 38.743         | 105.302        |

-----

| Center<br>Number | Atomic<br>Number | Atomic<br>Type | Coordinates (Angstroms) |           |           |
|------------------|------------------|----------------|-------------------------|-----------|-----------|
|                  |                  |                | X                       | Y         | Z         |
| 1                | 14               | 0              | -0.095507               | -0.077701 | -0.271742 |
| 2                | 6                | 0              | 0.150224                | 1.716208  | 0.124710  |
| 3                | 1                | 0              | -0.527958               | 2.271329  | -0.544413 |
| 4                | 1                | 0              | -0.283205               | 1.862421  | 1.128825  |
| 5                | 6                | 0              | 1.581989                | 2.271614  | 0.051570  |
| 6                | 1                | 0              | 1.998364                | 2.184372  | -0.957527 |
| 7                | 1                | 0              | 1.578660                | 3.333964  | 0.319739  |
| 8                | 1                | 0              | 2.253873                | 1.755429  | 0.745265  |
| 9                | 6                | 0              | 1.325898                | -1.220485 | -0.609227 |
| 10               | 1                | 0              | 0.997587                | -1.973127 | -1.337641 |
| 11               | 1                | 0              | 2.152332                | -0.655964 | -1.056332 |
| 12               | 6                | 0              | 1.805709                | -1.926217 | 0.691607  |
| 13               | 1                | 0              | 2.630008                | -2.602087 | 0.439128  |
| 14               | 1                | 0              | 2.176560                | -1.212505 | 1.434814  |
| 15               | 1                | 0              | 1.012555                | -2.525650 | 1.151436  |
| 16               | 6                | 0              | -1.810535               | -0.780279 | -0.289968 |
| 17               | 1                | 0              | -2.034237               | -0.942226 | -1.360386 |
| 18               | 1                | 0              | -1.749825               | -1.794547 | 0.132656  |
| 19               | 6                | 0              | -2.923511               | 0.045930  | 0.376863  |

|    |   |   |           |           |           |
|----|---|---|-----------|-----------|-----------|
| 20 | 1 | 0 | -3.885563 | -0.463493 | 0.252957  |
| 21 | 1 | 0 | -2.745900 | 0.167064  | 1.451043  |
| 22 | 1 | 0 | -3.014796 | 1.042204  | -0.068498 |

---

Spectra example for reaction:  $C_6D_5CD_2^+$  and toluene

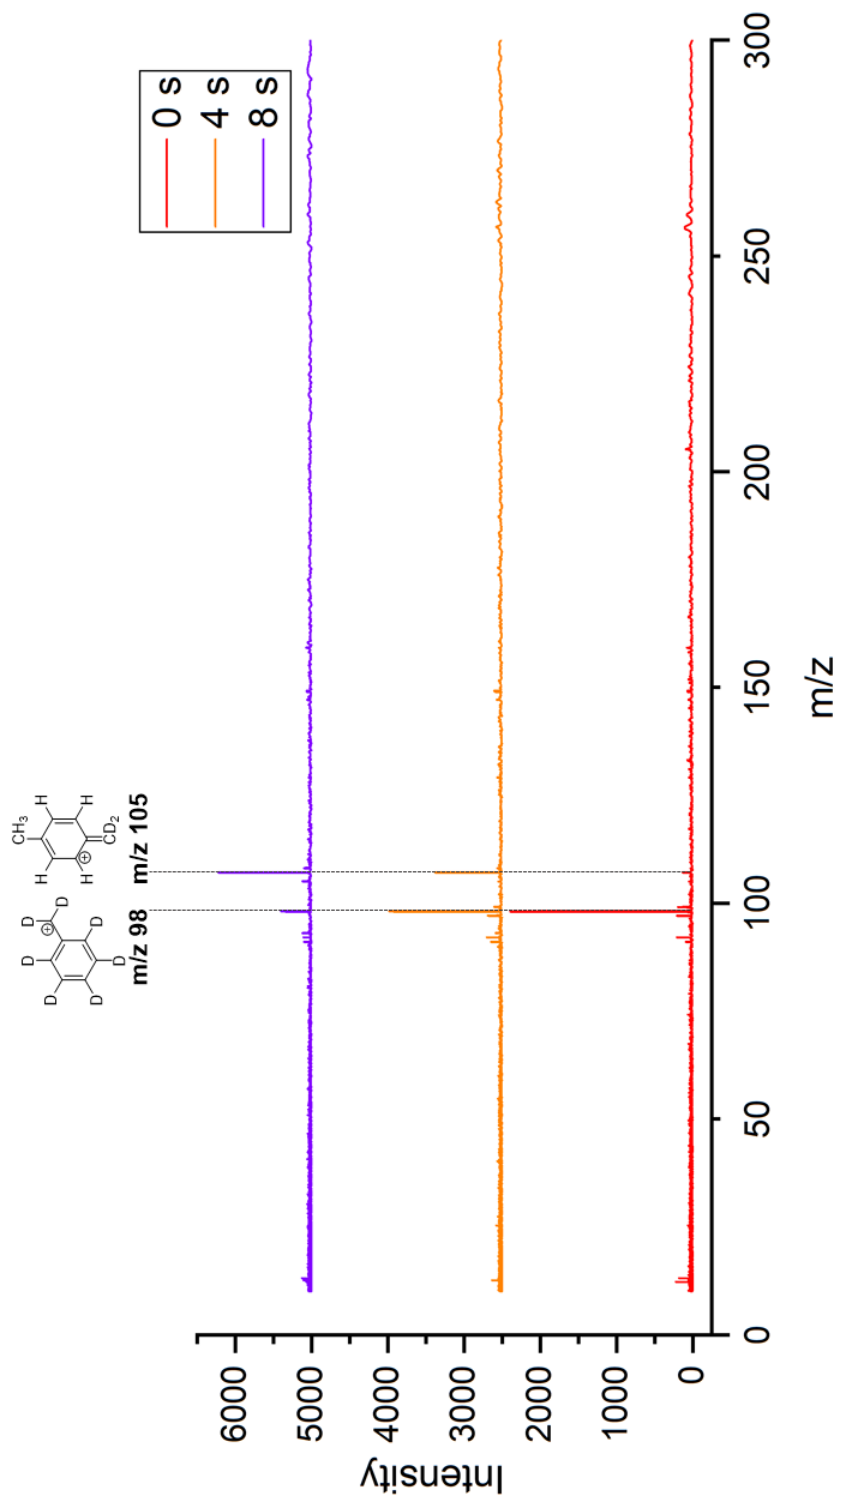

Spectra example #1: reaction between 3 and 1a-D:

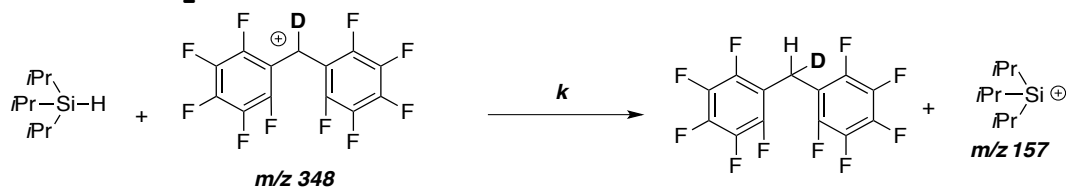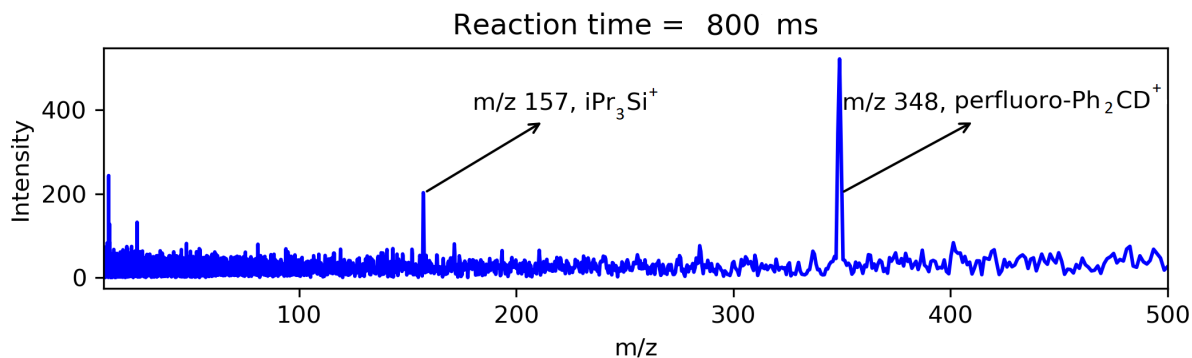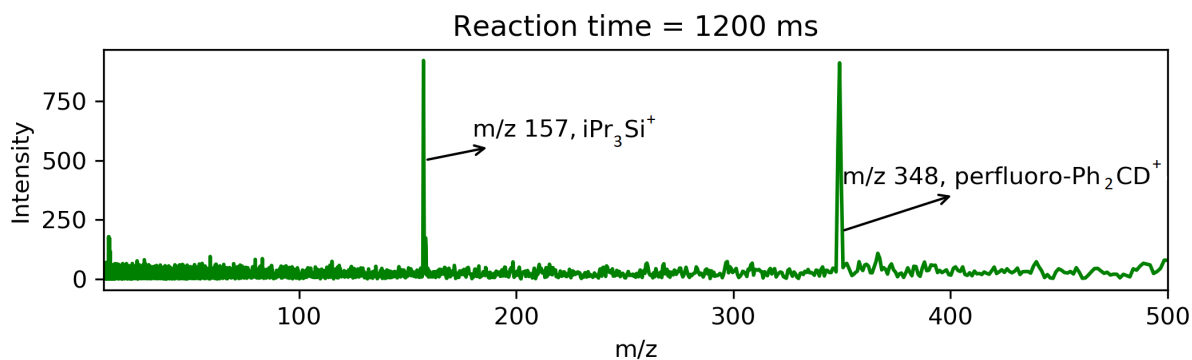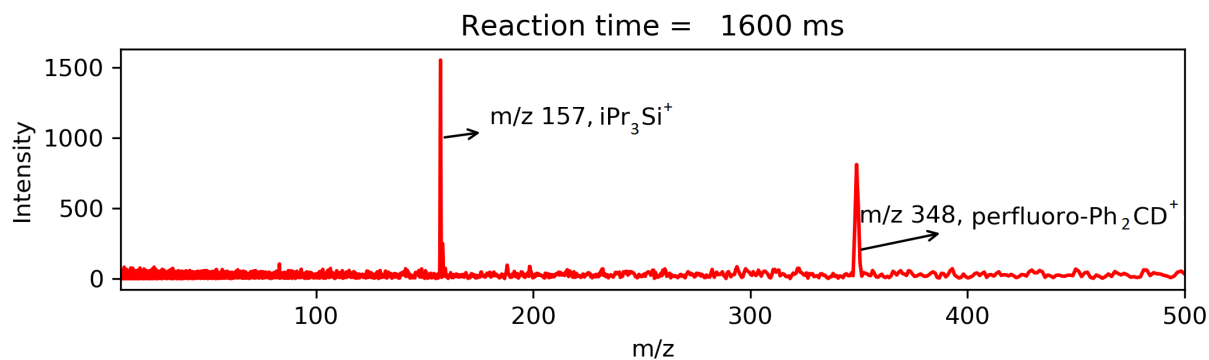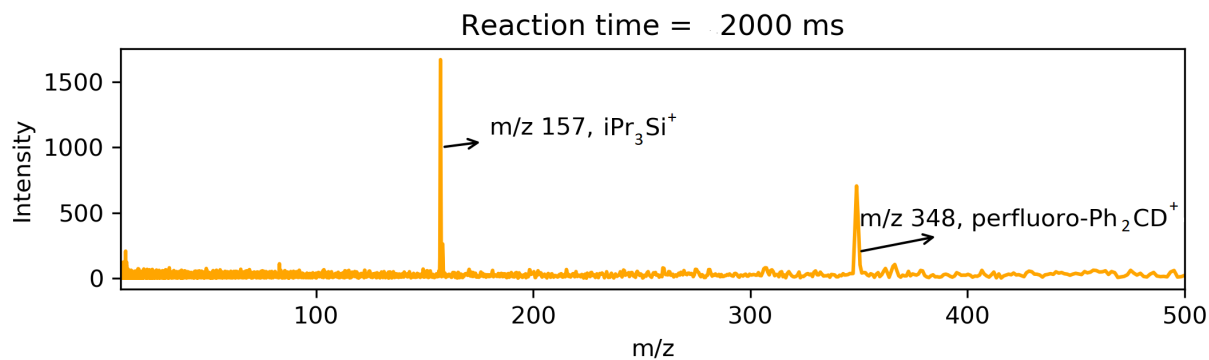



Plot of the kinetics #1: reaction between 3 and 1a-D:

The pressure of 3 is the average of pre-pressure and post-pressure.

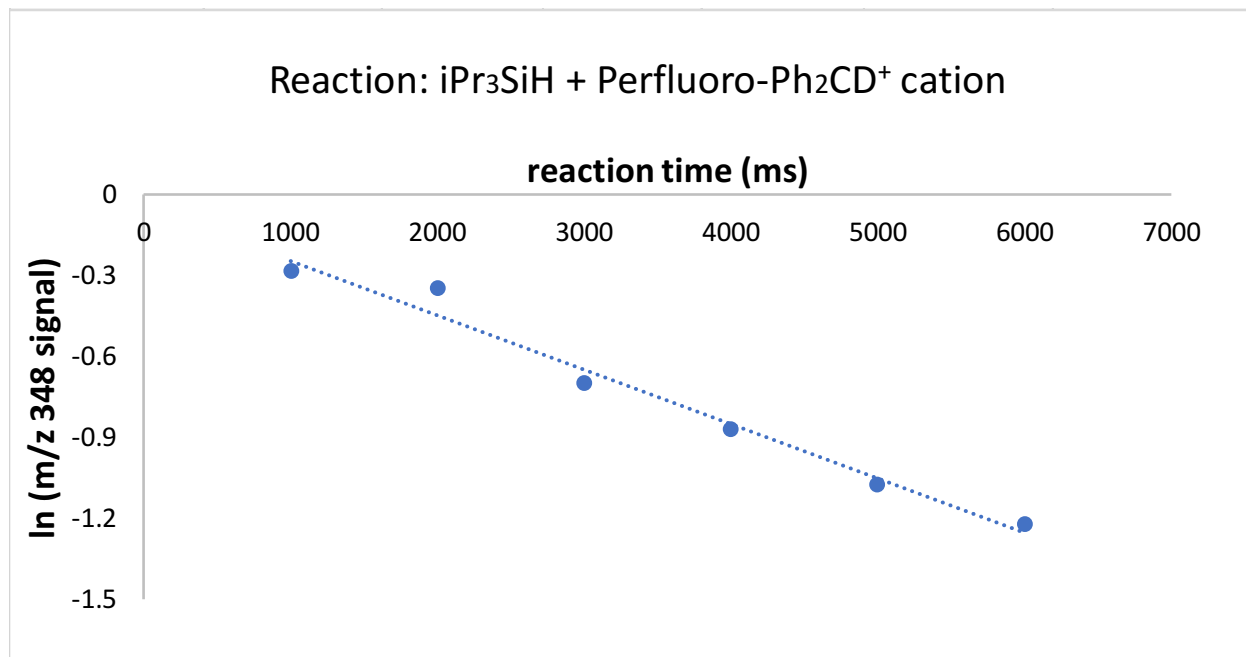

## Spectra example #2: reaction between 4 and 1c:

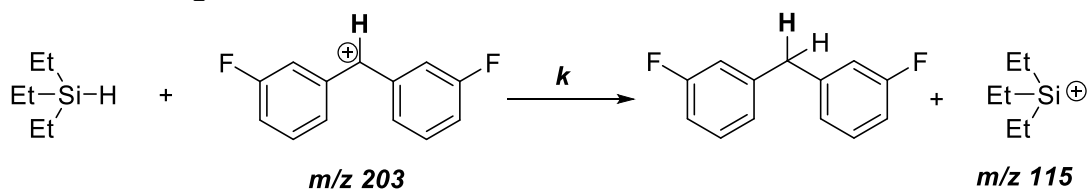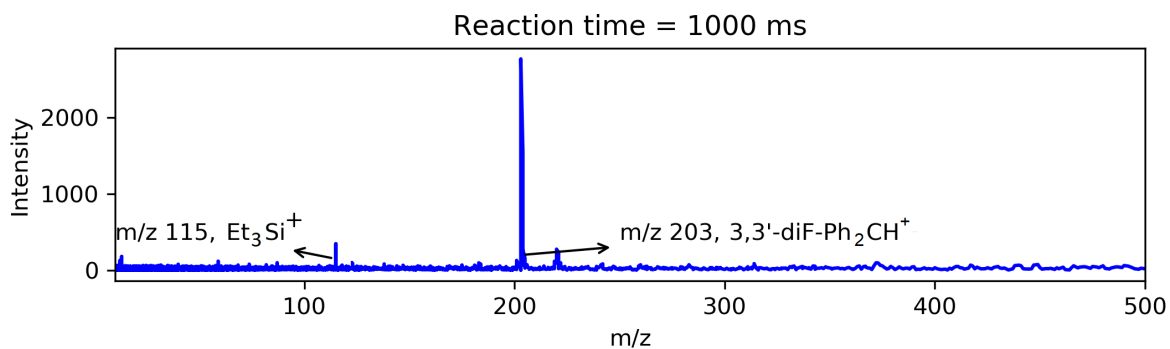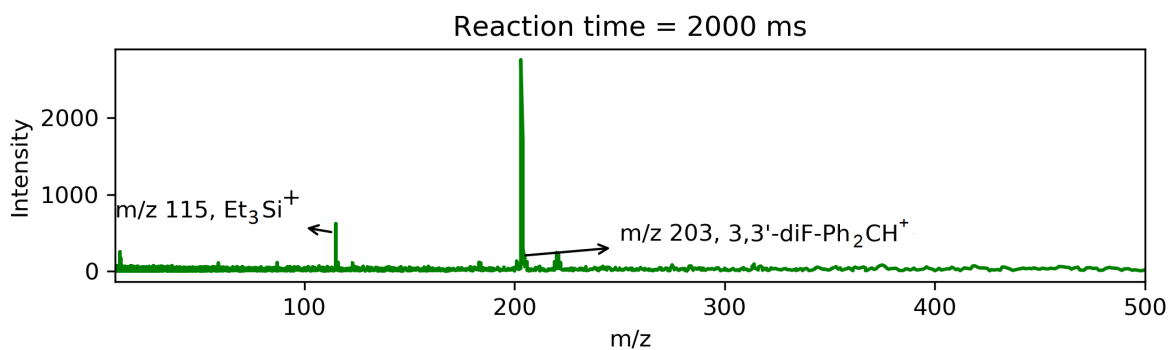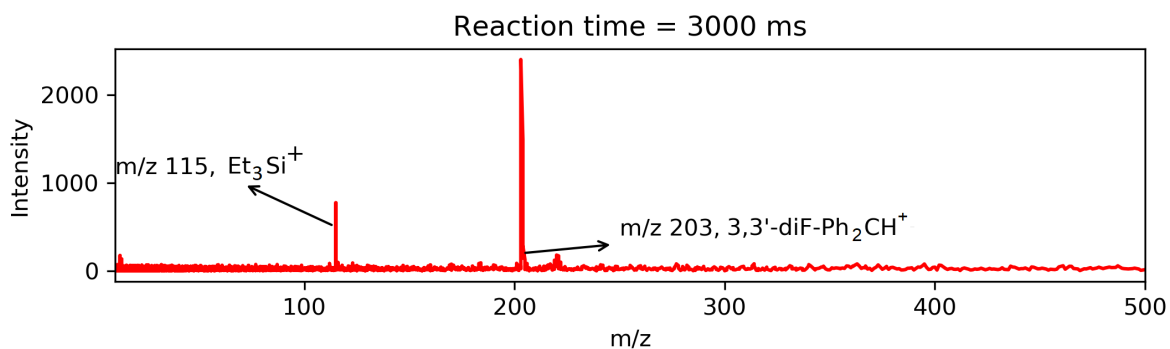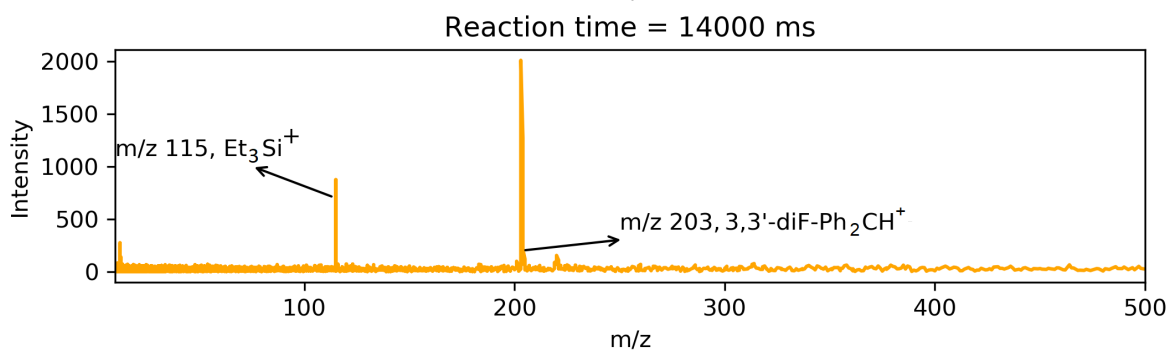

Plot of the kinetics #2: reaction between 4 and 1c:

The pressure of 4 is the average of pre-pressure and post-pressure.

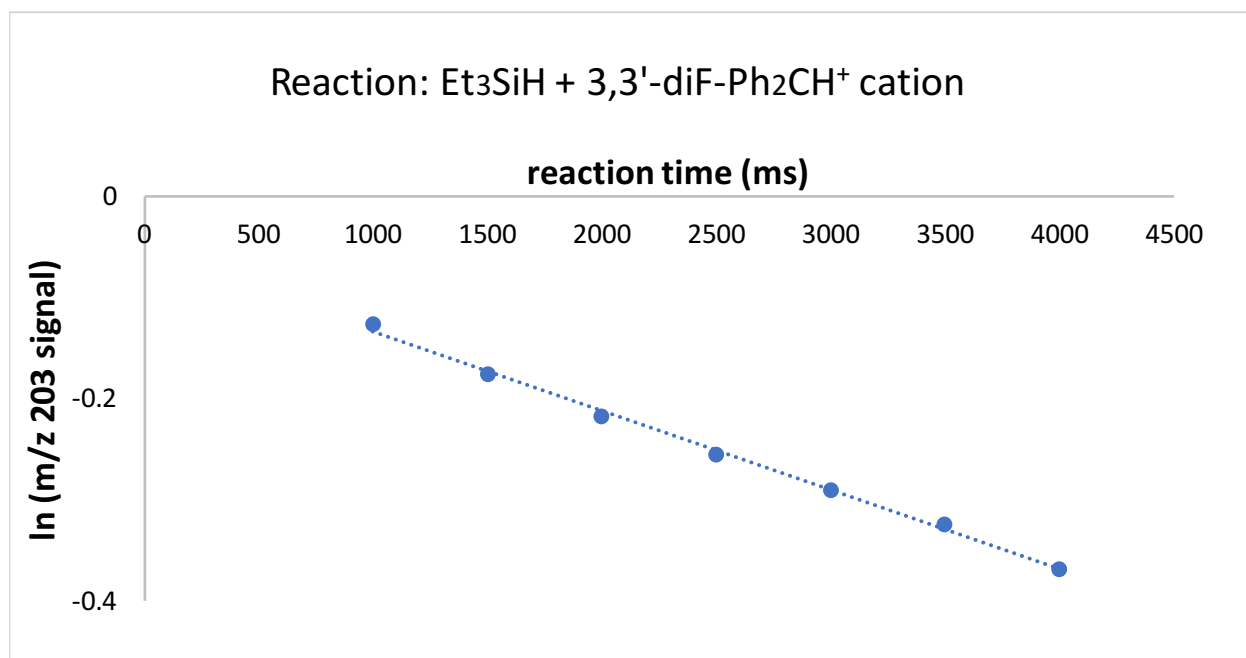

Supplement: c9sc02118c1.pdf [file c9sc02118c1.pdf]
